# Supplementary material for: Canonical WNT signaling-driven DKC1 dysregulates sphingolipid biosynthesis and drives colorectal cancer.
Source: Research Square preprint supplement (doi:10.21203/rs.3.rs-3180701/v1), 2023-12-04
Supplement: Supplementary file 1 [file 4a2a6804d3618b85c6fb6398.xlsx]

## Sheet: Volcano
Supplementary table 5a: Dysregulated lipids obtained after differential profile analysis from UHPC-MS/MS for SW620 shDKC1 vs shSCRM cells.
	FC	log2(FC)	raw.pval	[-LOG10(p)]
DG(36:1).1	0.63436	-0.65662	8.8922e-05	4.051
DG(36:1)	0.6396	-0.64475	0.0001309	3.8831
Gb3(d18:1/16:0)	0.2803	-1.835	0.00071779	3.144
PE(40:6)	1.8658	0.89978	0.0022095	2.6557
PE(P-18:0/18:2)	1.51	0.59455	0.0038349	2.4162
Hex2Cer(d18:1/24:1)	0.2519	-1.9891	0.0044031	2.3562
HexCer(d18:1/16:0)	0.53796	-0.89442	0.0050439	2.2972
PC(38:6)	1.7944	0.84348	0.0073131	2.1359
PE(P-18:0/20:4)	1.6236	0.69923	0.008429	2.0742
PC(38:4)	1.7626	0.81767	0.0088933	2.0509
PE(P-18:0/20:5)	1.6547	0.72658	0.011617	1.9349
PE(38:4)	1.5215	0.60548	0.014083	1.8513
LPC(18:3)	1.78	0.83184	0.015539	1.8086
HexCer(d18:1/24:1)	0.40582	-1.3011	0.017103	1.7669
Hex2Cer(d18:1/22:0)	0.31871	-1.6497	0.02075	1.683
PC(P-36:3)	1.7477	0.80546	0.020753	1.6829
PC(P-36:4)	1.6752	0.74433	0.021719	1.6632
LPC(18:0)	1.5967	0.67509	0.023066	1.637
DG(36:2).1	0.63673	-0.65124	0.024002	1.6198
Gb3(d18:1/22:0)	0.25153	-1.9912	0.027804	1.5559
LPC(20:5)	1.6313	0.70602	0.036873	1.4333
Cer(d19:1/24:1)	0.47502	-1.0739	0.039376	1.4048
Sphingosine	0.62868	-0.6696	0.04297	1.3668
PC(P-38:6)	1.5212	0.60519	0.044917	1.3476
SM(34:0)	1.5218	0.60574	0.045979	1.3374
Hex2Cer(d18:1/24:0)	0.20404	-2.2931	0.048095	1.3179

## Sheet: VIP
Supplementary table 5b: Variable Importance of Projection (VIP) scores of lipids from UHPC-MS/MS analysis of SW620 shDKC1 vs shSCRM cells.
	V1	V2
PC(36:1)	2.12796	0.0208464
DG(36:1).1	2.09458	0.254148
DG(36:1)	2.08206	0.268644
Gb3(d18:1/16:0)	2.03601	0.115606
PE(40:6)	1.99066	0.556685
PE(P-18:0/18:2)	1.96181	0.456438
HexCer(d18:1/16:0)	1.88761	0.584052
PC(38:6)	1.85249	0.713771
Hex2Cer(d18:1/24:1)	1.84938	0.573662
PE(P-18:0/20:4)	1.82041	0.571632
PC(38:4)	1.80901	0.639701
PE(P-18:0/20:5)	1.79743	0.739811
PE(38:4)	1.77282	0.751903
PC(P-36:3)	1.72765	0.674317
PE(P-18:0/22:6)	1.70191	0.677337
PC(P-36:4)	1.69831	0.771511
LPC(18:3)	1.69178	0.793717
HexCer(d18:1/24:1)	1.65544	0.82757
LPC(18:0)	1.65124	0.806793
Hex2Cer(d18:1/22:0)	1.63111	0.702004
DG(36:2).1	1.60636	0.744313
Gb3(d18:1/22:0)	1.58469	0.665914
DG(34:1).1	1.58037	0.910332
PC(P-38:6)	1.55345	0.921474
LPC(20:5)	1.51389	0.879302
DG(34:1)	1.51125	0.954447
Sphingosine	1.51119	0.917825
SM(34:0)	1.50758	0.777806
Cer(d19:1/24:1)	1.48477	0.918713
PE(36:1)	1.45821	0.332791
Hex2Cer(d18:1/24:0)	1.45499	0.779005
PI(38:4)	1.44653	0.950051
PE(P-16:0/20:5)	1.43405	0.882442
PC(36:4)	1.43265	0.906867
PE(38:6)	1.42228	0.943921
PE(P-18:0/18:1)	1.41888	0.0597387
LPC(18:2)	1.40059	0.942238
Gb3(d18:1/24:0)	1.38218	0.746656
PE(P-16:0/18:2)	1.37555	0.723251
HexCer(d18:1/22:0)	1.36566	0.957132
LPC(17:0)	1.36124	0.912515
Cer(d19:1/24:0)	1.3491	1.02793
DG(32:0)	1.33758	0.837987
LPC(20:3)	1.3193	1.06011
Cer(d19:1/22:0)	1.29229	0.947
PC(36:3)	1.24483	0.955461
Cer(d18:1/16:0)	1.24482	1.02989
DG(34:2).1	1.23006	0.945988
PE(P-16:0/18:1)	1.22839	0.820638
HexCer(d18:2/24:0)	1.22304	1.07185
CAR(18:2)	1.22168	0.0418302
GM3(d18:1/24:0)	1.21962	0.264372
Cer(m18:1/24:1)	1.21025	1.02998
DG(34:2).2	1.20119	0.927866
Cer(d18:1/18:0)	1.19464	0.679413
SM(32:0)	1.19058	0.959665
LPC(P-16:0)	1.18804	1.0746
LPC(20:4)	1.18557	0.913644
Cer(d19:1/23:0)	1.18175	0.663164
Cer(d18:2/24:1)	1.17715	1.06663
HexCer(d18:1/24:0)	1.16973	0.976688
PE(P-16:0/22:6)	1.15519	1.07969
LPE(P-18:0)	1.1505	0.692859
PI(36:1)	1.10302	1.07317
LPC(16:0)	1.07051	1.0731
GM3(d18:1/16:0)	1.06413	0.63595
TG(54:6).1	1.05883	0.761234
Cer(d18:1/24:1)	1.05738	1.0847
PG(34:1)	1.03358	1.03994
TG(56:7)	1.03084	0.996224
CAR(18:0)	1.012	0.903959
SM(38:1)	1.01066	0.409622
PG(34:0)	1.00679	1.02187
LPE(P-16:0)	0.993993	1.01081
CAR(16:0)	0.980251	0.427546
PC(40:8)	0.971752	1.03465
PC(38:5)	0.967915	1.17057
Cer(d18:2/22:0)	0.961158	1.14978
LPE(18:0)	0.956345	0.832293
PC(P-34:2)	0.933884	1.10275
PI(36:4)	0.928996	0.911877
LPC(O-22:6)	0.876626	0.848714
CAR(14:0)	0.87511	0.584426
TG(58:9)	0.864951	0.983059
Cer(d18:1/22:0)	0.860665	1.00999
PE(P-18:1/20:4)	0.85629	1.12916
SM(36:1)	0.849697	1.15479
PI(38:5)	0.843152	1.04232
PC(40:7)	0.843007	1.20682
PC(P-32:0)	0.841943	0.974019
GM3(d18:1/22:0)	0.811847	0.118069
PE(36:4)	0.811608	1.20027
TG(50:2).1	0.809712	1.16519
Cer(d16:1/22:0)	0.790094	1.05174
SM(42:3)	0.785221	0.899384
TG(54:2)	0.784127	1.01804
GM3(d18:1/18:0)	0.783851	0.7115
CAR(18:1)	0.782694	0.173067
LPC(O-16:0)	0.774366	1.23434
DG(36:3).1	0.76467	1.20806
TG(54:6)	0.757667	1.19478
LPC(22:6)	0.751765	1.16897
DG(38:4)	0.741607	0.947928
DG(36:2).2	0.735574	1.01955
TG(56:6)	0.722333	1.10024
LPC(15:0)	0.720231	1.06878
TG(52:2)	0.713027	1.15094
LPC(16:1)	0.708066	1.15901
LPC(22:5)	0.69554	1.06595
TG(50:3).2	0.690036	1.05154
TG(48:1)	0.688016	1.23439
TG(52:3).1	0.685984	1.15644
PC(O-32:0)	0.67784	1.19917
DG(36:3)	0.666364	1.22933
Sphinganine	0.6622	1.24098
LPE(20:4)	0.661228	1.17839
TG(52:2).3	0.655893	1.19882
SM(36:0)	0.637566	1.25778
PI(38:6)	0.63719	1.21122
DG(36:2)	0.630016	1.01008
TG(48:1).1	0.607439	1.25751
DG(32:1).1	0.591428	1.16599
Cer(d18:1/23:0)	0.586245	1.01519
TG(50:3).3	0.573103	1.20424
LPC(18:1)	0.559837	1.26961
SM(32:1)	0.558585	1.146
PC(O-38:6)	0.548216	0.883778
Cer(m18:1/22:0)	0.53832	1.10094
DG(32:1)	0.538127	1.09114
TG(48:2)	0.517767	1.26037
Cer(d18:1/24:0)	0.510249	1.02506
TG(52:2).2	0.503032	1.1223
PI(36:3)	0.502671	1.12101
SM(40:2)	0.483249	0.0215979
TG(52:2).1	0.481031	1.21164
LPC(20:1)	0.474538	1.11151
SM(32:2)	0.467489	1.26415
TG(50:3)	0.456123	1.21063
CAR(12:0)	0.434257	0.906935
TG(56:5)	0.432002	1.10793
LPE(18:1)	0.426763	1.241
PI(40:5)	0.40507	0.980319
SM(41:1)	0.400749	0.955422
TG(52:4)	0.397891	1.23348
PE(36:3)	0.396632	1.13526
PE(34:2)	0.392965	1.05655
TG(48:2).2	0.386466	1.21243
PI(34:2)	0.366417	0.971094
TG(50:2)	0.346612	1.24917
Cer(d18:0/24:1)	0.320112	1.23721
SM(36:2)	0.310055	1.09701
SM(40:1)	0.307373	1.06452
DG(36:4)	0.303991	1.11262
TG(50:3).1	0.294717	1.09887
LPE(18:2)	0.29468	1.23322
Cer(m18:0/24:0)	0.280317	1.03858
Cer(d18:0/22:0)	0.271121	0.945327
Cer(d18:0/24:0)	0.262725	0.947326
TG(52:4).1	0.262673	1.18382
LPE(22:6)	0.261528	1.2813
SM(42:1)	0.259243	1.07711
Cer(d18:2/23:0)	0.247138	1.20802
PI(40:6)	0.238094	1.08908
DG(38:6)	0.228603	1.2941
Cer(d17:1/24:0)	0.224669	1.05996
PE(36:2)	0.22223	1.12575
Cer(m18:0/24:1)	0.215535	0.911545
TG(54:3)	0.208827	1.2267
Cer(d16:1/23:0)	0.204899	1.00812
TG(48:2).1	0.204485	1.23199
SM(34:2)	0.200132	1.16741
TG(52:3)	0.196274	1.199
Cer(m18:1/23:0)	0.176889	1.02363
SM(33:1)	0.172537	0.901476
PE(34:0)	0.16196	0.244033
Cer(d18:2/24:0)	0.159961	1.29348
TG(50:3).4	0.159333	1.24014
PC(36:0)	0.154482	1.15498
PS(34:0)	0.139688	0.783263
PE(P-18:1/22:6)	0.123482	1.2964
DG(34:2)	0.121955	1.32551
LPC(O-18:1)	0.117634	1.15378
SM(42:2)	0.0983874	1.11048
LPE(16:0)	0.0857429	1.13961
PI(34:1)	0.0729125	1.26079
LPC(14:0)	0.0718326	1.12673
PI(36:2)	0.0717732	0.993907
PE(38:5)	0.0658358	1.31312
Cer(d18:0/23:0)	0.0658039	1.02358
Cer(d16:1/24:0)	0.0552691	1.0204
DG(34:2).3	0.0381343	1.31902
PE(34:1)	0.0354541	1.26575
Cer(m18:0/23:0)	0.0331866	0.896445
DG(38:5)	0.0291823	1.01684
Cer(m18:0/22:0)	0.015843	1.03961
Cer(m18:1/24:0)	0.0102075	1.21957

## Sheet: LION
Supplementary table 5c: Differential lipid ontologies for SW620 shDKC1 vs shSCRM cells.
Term ID	Description	Annotated	p-value	FDR q-value	ES	Regulated
LION:0000003	glycerophospholipids [GP]	79	1.8e-15	1.71e-13	0.586461	UP
LION:0080947	d18:1 (sphingosine)	20	1.6e-14	7.6e-13	-0.850575	DOWN
LION:0000095	headgroup with positive charge / zwitter-ion	81	3.6e-14	1.14e-12	0.559816	UP
LION:0000453	simple glc series [SP0501]	8	1.1e-09	2.61e-08	-0.951613	DOWN
LION:0012010	membrane component	123	3.9e-09	7.41e-08	0.45975	UP
LION:0000010	glycerophosphocholines [GP01]	35	1e-08	1.58e-07	0.554717	UP
LION:0000094	headgroup with neutral charge	56	2.6e-08	3.53e-07	-0.464027	DOWN
LION:0000004	sphingolipids [SP]	58	4.2e-08	4.99e-07	-0.453093	DOWN
LION:0012441	N-acylsphingosines (ceramides) [SP0201]	30	1.3e-07	1.37e-06	-0.549187	DOWN
LION:0002950	fatty acid with 22-24 carbons	46	1.6e-07	1.52e-06	-0.467979	DOWN
LION:0002967	polyunsaturated fatty acid	21	1.9e-06	1.64e-05	0.579686	UP
LION:0012017	hexosylceramides	5	5.7e-06	4.51e-05	-0.936508	DOWN
LION:0000466	positive intrinsic curvature	35	7.7e-06	5.63e-05	0.451752	UP
LION:0001734	contains vinyl ether bond (plasmalogen)	16	1e-05	6.79e-05	0.610253	UP
LION:0002963	fatty acid with 24 carbons	21	1.2e-05	7.12e-05	-0.541976	DOWN
LION:0012082	plasma membrane	47	1.2e-05	7.12e-05	-0.399624	DOWN
LION:0012268	d19:1	4	2.5e-05	0.00014	-0.952632	DOWN
LION:0002976	fatty acid with more than 3 double bonds	16	3.1e-05	0.000164	0.582865	UP
LION:0012018	dihexosylceramides	3	3.3e-05	0.000165	-0.984293	DOWN
LION:0000002	glycerolipids [GL]	48	3.8e-05	0.00018	-0.379281	DOWN
LION:0002977	fatty acid with 3-5 double bonds	10	4.6e-05	0.000208	0.695652	UP
LION:0012081	mitochondrion	32	9.4e-05	0.000405	0.41821	UP
LION:0012080	endoplasmic reticulum (ER)	106	9.8e-05	0.000405	0.314966	UP
LION:0080982	above average lateral diffusion	11	0.00012	0.000475	0.641331	UP
LION:0000465	neutral intrinsic curvature	18	0.00015	0.00057	0.516414	UP
LION:0002945	fatty acid with more than 18 carbons	55	0.00019	0.000694	-0.33499	DOWN
LION:0000011	glycerophosphoethanolamines [GP02]	30	0.00032	0.00108	0.403252	UP
LION:0000599	lysoglycerophospholipids	21	0.00032	0.00108	0.465456	UP
LION:0002938	C24:0	13	0.00033	0.00108	-0.569061	DOWN
LION:0002930	C20:5	3	0.00037	0.00116	0.95288	UP
LION:0000034	monoacylglycerophosphocholines [GP0105]	15	0.00038	0.00116	0.531471	UP
LION:0000464	negative intrinsic curvature	74	0.00044	0.0013	-0.297523	DOWN
LION:0000040	1-(1z-alkenyl),2-acylglycerophosphoethanolamines [GP0203]	11	0.00045	0.0013	0.599603	UP
LION:0002931	C22:0	11	0.00048	0.0013	-0.597615	DOWN
LION:0080973	below average bilayer thickness	7	0.00048	0.0013	0.721925	UP
LION:0012009	lipid-mediated signalling	71	0.00054	0.00143	-0.296118	DOWN
LION:0000030	diacylglycerophosphocholines [GP0101]	9	0.0013	0.00334	0.613213	UP
LION:0001740	above average transition temperature	17	0.00145	0.00362	0.463277	UP
LION:0080979	high lateral diffusion	8	0.00226	0.00549	0.622312	UP
LION:0000607	diacylglycerols [GL0201]	20	0.00231	0.00549	-0.418966	DOWN
LION:0000087	gangliosides [SP0601]	4	0.00288	0.00667	-0.815789	DOWN
LION:0002959	fatty acid with 20 carbons	9	0.00315	0.00713	0.577778	UP
LION:0002948	fatty acid with 16-18 carbons	45	0.00375	0.00828	0.294258	UP
LION:0000100	fatty acid with 18 carbons or less	49	0.00521	0.011	0.278958	UP
LION:0080969	low bilayer thickness	5	0.00521	0.011	0.714286	UP
LION:0002923	C18:2	5	0.00656	0.0133	0.699471	UP
LION:0002970	fatty acid with 2 double bonds	5	0.00656	0.0133	0.699471	UP
LION:0000093	headgroup with negative charge	14	0.00741	0.0147	0.445238	UP
LION:0001741	below average transition temperature	14	0.0079	0.0153	0.442063	UP
LION:0002939	C24:1	8	0.00846	0.0161	-0.561828	DOWN
LION:0001739	very high transition temperature	10	0.00919	0.0171	0.505435	UP
LION:0002966	fatty acid with less than 2 double bonds	77	0.00979	0.0172	-0.234321	DOWN
LION:0000622	triacylglycerols [GL0301]	28	0.00993	0.0172	-0.32315	DOWN
LION:0012011	lipid storage	28	0.00993	0.0172	-0.32315	DOWN
LION:0012084	lipid droplet	28	0.00993	0.0172	-0.32315	DOWN
LION:0002973	fatty acid with 5 double bonds	4	0.01408	0.0239	0.721053	UP
LION:0002929	C20:4	4	0.02824	0.0471	0.673684	UP
LION:0012216	d18:2	5	0.03522	0.0577	-0.597884	DOWN
LION:0022266	C23:0	7	0.03599	0.058	-0.513369	DOWN
LION:0001735	very low transition temperature	3	0.03689	0.0584	0.743455	UP
LION:0000047	diacylglycerophosphoinositols [GP0601]	11	0.03789	0.059	0.417288	UP
LION:0000032	1-(1z-alkenyl),2-acylglycerophosphocholines [GP0103]	5	0.04211	0.0645	0.583069	UP
LION:0002957	fatty acid with 18 carbons	31	0.04417	0.0666	0.263012	UP
LION:0002968	saturated fatty acid	62	0.05175	0.0763	-0.203079	DOWN
LION:0002955	fatty acid with 16 carbons	15	0.0522	0.0763	0.348231	UP
LION:0000084	ceramide phosphocholines (sphingomyelins) [SP0301]	16	0.05425	0.077	0.337079	UP
LION:0080980	very high lateral diffusion	3	0.05427	0.077	0.706806	UP
LION:0144175	Cer(41:1)	3	0.06629	0.0921	-0.685864	DOWN
LION:0080981	below average lateral diffusion	9	0.06693	0.0921	0.421622	UP
LION:0002882	C16:0	14	0.07107	0.0965	0.343651	UP
LION:0080971	high bilayer thickness	8	0.09812	0.131	0.419355	UP
LION:0000744	TG(48:2)	3	0.10383	0.137	-0.638743	DOWN
LION:0001738	high transition temperature	7	0.1072	0.14	0.438503	UP
LION:0000647	DG(36:2)	3	0.11542	0.148	-0.628272	DOWN
LION:0001736	low transition temperature	11	0.11695	0.148	0.352211	UP
LION:0000640	DG(34:2)	4	0.12808	0.16	-0.547368	DOWN
LION:0002937	C22:6	6	0.14205	0.175	0.446809	UP
LION:0002921	C18:0	15	0.14797	0.18	0.29311	UP
LION:0000038	diacylglycerophosphoethanolamines [GP0201]	11	0.16553	0.198	0.329856	UP
LION:0080970	average bilayer thickness	8	0.1664	0.198	0.380376	UP
LION:0000761	TG(52:2)	4	0.17538	0.206	-0.513158	DOWN
LION:0012125	d16:1	3	0.19045	0.221	-0.575916	DOWN
LION:0002961	fatty acid with 22 carbons	18	0.23498	0.269	-0.245581	DOWN
LION:0002947	fatty acid with 13-15 carbons	3	0.28034	0.317	0.528796	UP
LION:0080977	low lateral diffusion	5	0.29134	0.326	0.412698	UP
LION:0000753	TG(50:3)	5	0.29984	0.331	-0.408466	DOWN
LION:0002922	C18:1	12	0.30799	0.336	0.27381	UP
LION:0000042	monoacylglycerophosphoethanolamines [GP0205]	6	0.3153	0.34	0.37234	UP
LION:0001737	average transition temperature	8	0.32842	0.351	0.322581	UP
LION:0080976	very low lateral diffusion	4	0.35722	0.377	0.431579	UP
LION:0002969	monounsaturated fatty acid	21	0.37167	0.388	-0.202587	DOWN
LION:0001704	Cer(42:1)	3	0.38152	0.394	-0.483421	DOWN
LION:0080948	d18:0 (dihydrosphingosine)	4	0.4038	0.412	-0.415789	DOWN
LION:0000035	monoalkylglycerophosphocholines [GP0106]	3	0.45541	0.46	0.455497	UP
LION:0080978	average lateral diffusion	3	0.86858	0.869	0.308901	UP
