# Supplementary material for: Canonical WNT signaling-driven DKC1 dysregulates sphingolipid biosynthesis and drives colorectal cancer.
Source: Research Square preprint supplement (doi:10.21203/rs.3.rs-3180701/v1), 2023-12-04
Supplement: Supplementary file 2 [file 676945df0b621746768099f1.xlsx]

## Sheet: Volcano
Supplementary table 6a: Dysregulated lipids obtained after differential profile analysis from UHPC-MS/MS for DKC1-High vs DKC1-Low tumor tissues.
	FC	log2(FC)	raw.pval	[-LOG10(p)]
SM(42:2)	0.50145	-0.99583	0.0065639	2.1828
CAR(12:0)	0.17131	-2.5453	0.0075575	2.1216
PC(40:6)	0.63694	-0.65076	0.012282	1.9107
CAR(14:0)	0.31275	-1.6769	0.015872	1.7994
DG(38:4)	0.30876	-1.6954	0.031341	1.5039
Cer(d18:1/24:0)	2.393	1.2588	0.040303	1.3947
Cer(d18:2/23:0)	2.2604	1.1766	0.043218	1.3643
PE(P-16:0/18:1)	2.2752	1.186	0.044548	1.3512
SM(38:2)	0.56314	-0.82845	0.045089	1.3459
SM(38:1)	0.57618	-0.79541	0.047492	1.3234
PE(P-18:0/18:1)	2.3694	1.2445	0.047566	1.3227
HexCer(d18:1/24:1)	0.52737	-0.92311	0.04817	1.3172

## Sheet: VIP scores
Supplementary table 6b: Variable Importance of Projection (VIP) scores of lipids from UHPC-MS/MS analysis of DKC1-High vs DKC1-Low tumor tissues.
	V1	V2
SM(42:2)	2.09454	0.55506
CAR(12:0)	2.05297	0.624851
PC(40:6)	2.02062	0.485547
CAR(14:0)	1.93422	0.728175
SM(34:1)	1.85983	0.735629
DG(38:4)	1.77576	0.755771
Cer(d18:1/24:0)	1.72142	0.770476
Cer(d18:2/23:0)	1.71242	0.685777
SM(38:2)	1.67276	0.503289
SM(38:1)	1.66867	0.685499
PE(P-18:0/18:1)	1.66544	0.743166
HexCer(d18:1/24:1)	1.61993	0.777362
PE(P-16:0/18:1)	1.61256	0.541043
PC(38:4)	1.58986	0.700368
PE(P-18:0/18:2)	1.58914	0.762402
PC(P-34:2)	1.5633	0.843401
SM(36:1)	1.56034	0.701555
CAR(16:0)	1.51671	0.891931
Cer(d18:1/22:0)	1.50708	0.786398
PC(32:0)	1.49464	0.811143
PC(P-36:3)	1.48706	0.823459
SM(36:2)	1.47515	0.508453
LPC(20:4)	1.47424	0.740841
CAR(18:2)	1.46187	0.900143
CAR(18:1)	1.45943	0.924524
PE(34:1)	1.45917	0.889668
PC(38:5)	1.43644	0.772662
PS(38:4)	1.42903	0.836378
SM(42:3)	1.40006	0.733157
Cer(m18:1/24:0)	1.38947	0.794998
SM(32:1)	1.38902	0.905982
SM(33:1)	1.38734	0.961403
Cer(m18:1/24:1)	1.38694	1.01202
DG(34:2).2	1.34258	0.996083
DG(34:2).1	1.32874	1.01193
PE(36:3)	1.31346	1.01212
DG(36:4).1	1.30486	0.864432
LPC(22:6)	1.28929	0.912476
PE(P-16:0/18:2)	1.286	0.817653
Cer(d18:0/24:0)	1.28403	0.58062
PC(38:6)	1.2791	0.76316
DG(32:1).1	1.2773	1.01918
SM(40:2)	1.27715	0.52648
Cer(d18:1/16:0)	1.26975	0.832864
Cer(m18:1/22:0)	1.2549	1.03724
PI(36:2)	1.25443	1.04097
SM(34:2)	1.25261	0.77282
GM3(d18:1/18:0)	1.25121	0.979904
Cer(d18:0/24:1)	1.23698	0.665124
PC(P-38:6)	1.22794	0.83476
GM3(d18:1/16:0)	1.22642	1.05585
HexCer(d18:1/16:0)	1.22569	0.337391
DG(32:1)	1.22068	1.01606
GM3(d18:1/22:0)	1.21596	1.06217
PE(36:2)	1.21363	0.999412
PE(34:2)	1.20695	1.04163
PI(34:2)	1.20642	0.935916
PC(36:4)	1.20568	0.767032
DG(36:2).1	1.1974	1.06059
SM(40:1)	1.16606	0.568716
PS(34:0)	1.15058	0.774323
Cer(d18:0/23:0)	1.14717	0.578002
Cer(d18:0/22:0)	1.12026	0.675109
LPC(O-18:1)	1.11692	0.977038
PE(36:1)	1.11303	0.88453
PC(P-36:4)	1.10538	0.993985
LPC(22:5)	1.10178	0.828763
Cer(d16:1/23:0)	1.09914	0.98367
DG(38:5)	1.09774	0.997042
DG(34:1)	1.0895	1.09726
LPE(22:6)	1.08776	1.09198
DG(34:1).1	1.07903	1.09913
PC(34:2)	1.07365	1.04349
PI(38:4)	1.04924	0.819794
PC(36:0)	1.04838	0.942053
TG(50:1)	1.03004	1.11244
TG(50:2).3	1.02922	1.11175
TG(48:1).3	1.02203	1.11322
TG(50:2).2	1.02103	1.11333
TG(52:1).1	1.01916	1.11489
TG(48:1)	1.01758	1.11411
TG(50:2).1	1.01575	1.11501
TG(48:1).1	1.01566	1.11474
TG(50:2)	1.01452	1.1155
TG(52:1).3	1.01177	1.11781
TG(48:1).2	1.01152	1.11535
TG(52:1).2	1.01101	1.11767
TG(48:1).4	1.01023	1.11578
TG(48:2).3	1.00947	1.11589
Cer(d19:1/24:1)	1.00921	0.91957
PE(38:6)	1.00899	1.00763
TG(52:1)	1.00809	1.11864
Gb3(d18:1/22:0)	1.0066	1.05856
TG(48:2).4	1.00582	1.11695
TG(48:2).2	1.00505	1.11699
TG(48:2)	1.00171	1.11792
TG(50:3).2	1.00119	1.11804
TG(52:3).2	0.999653	1.11926
TG(52:5).4	0.9971	1.12218
TG(50:3).1	0.996863	1.11918
TG(50:3).4	0.995952	1.11941
Cer(m18:0/24:1)	0.995313	1.097
TG(50:3).3	0.994978	1.11964
TG(48:2).1	0.994354	1.11941
TG(51:0)	0.993063	1.12196
TG(50:3)	0.991638	1.12058
TG(48:2).5	0.990435	1.12044
TG(52:5).1	0.989901	1.12327
TG(52:3)	0.986799	1.12296
TG(52:4).3	0.986493	1.1221
TG(50:2).4	0.985151	1.12292
TG(52:4).2	0.984787	1.12226
TG(54:2).2	0.984531	1.12364
TG(52:1).4	0.982887	1.12587
TG(52:3).1	0.980673	1.12402
TG(54:2)	0.980311	1.12471
TG(54:6).3	0.978544	1.13053
TG(52:4).1	0.977549	1.12451
TG(54:5).3	0.977394	1.12535
TG(52:3).3	0.976649	1.12499
TG(52:4)	0.976043	1.12494
TG(54:2).1	0.970451	1.12764
TG(52:4).4	0.969276	1.12619
TG(52:5).2	0.968003	1.12791
TG(52:1).5	0.967495	1.13046
PI(38:5)	0.963272	1.08684
TG(52:5).3	0.961458	1.12973
TG(54:4).1	0.960934	1.12927
PC(40:8)	0.957962	1.03906
TG(54:7)	0.957334	1.12942
TG(52:5)	0.956308	1.13161
TG(54:5).1	0.950816	1.13159
TG(58:9)	0.950716	1.13215
TG(54:4).2	0.946436	1.13333
DG(36:1)	0.940192	1.08663
TG(54:5).2	0.938698	1.13446
PE(P-18:0/20:5)	0.937548	0.94339
TG(54:2).4	0.936064	1.13646
TG(54:4)	0.934344	1.13496
CE(18:1)	0.934051	1.12747
TG(54:5)	0.933457	1.13585
TG(54:6).1	0.92824	1.13859
CE(22:6)	0.925308	0.990707
TG(54:2).3	0.924233	1.1393
PC(36:1)	0.923998	0.805943
PC(34:1)	0.91879	0.98279
LPC(18:0)	0.918009	0.867866
LPE(20:4)	0.901286	1.10722
TG(54:6)	0.884493	1.14906
LPC(18:1)	0.875456	1.08274
PC(O-32:0)	0.870353	1.04838
TG(54:6).2	0.868382	1.14171
GM3(d18:1/24:0)	0.867002	1.06327
PE(P-18:1/22:6)	0.862818	0.854564
CE(20:5)	0.862183	1.13105
Gb3(d18:1/24:0)	0.839312	1.06561
TG(56:5).1	0.83618	1.0683
DG(34:2)	0.823911	1.14837
PE(40:6)	0.82056	1.00429
CAR(18:0)	0.817645	1.0128
Sphingosine	0.813487	0.278675
PE(P-16:0/22:6)	0.809208	1.07179
SM(34:0)	0.805163	1.08242
TG(56:5)	0.804613	1.15603
TG(54:7).2	0.797647	1.14979
PE(38:4)	0.782916	1.03129
Gb3(d18:1/16:0)	0.778894	0.990901
HexCer(d18:1/24:0)	0.777455	0.7516
PE(P-16:0/20:5)	0.775373	0.992732
Cer(d18:2/22:0)	0.769424	1.03381
PC(32:1)	0.765363	1.02209
TG(54:7).1	0.763696	1.15976
TG(56:7)	0.751561	1.1596
CE(18:2)	0.751002	1.16149
DG(34:2).3	0.750233	1.15164
PI(38:6)	0.746353	0.868044
PI(36:1)	0.713487	1.03822
TG(56:6)	0.69553	1.16935
LPC(18:2)	0.690697	1.13264
PC(36:3)	0.682983	0.942188
LPE(18:1)	0.682383	1.10881
DG(36:1).1	0.680658	1.13456
Cer(d18:1/24:1)	0.679876	0.640152
TG(56:6).2	0.679124	1.12139
DG(36:3).1	0.667912	1.11354
PI(34:1)	0.653938	1.02138
DG(36:3)	0.63853	1.12391
DG(38:6)	0.637872	0.790008
Cer(m18:0/22:0)	0.629407	1.14928
TG(56:6).1	0.617995	1.15391
SM(32:0)	0.611104	1.14019
LPC(16:1)	0.610756	1.10975
CE(24:4)	0.603002	1.01773
CE(20:3)	0.599864	1.15701
LPC(20:1)	0.592406	0.95279
TG(56:7).1	0.589885	1.18037
LPE(18:2)	0.585798	1.1892
CE(18:3)	0.56613	1.17158
HexCer(d18:1/22:0)	0.560697	0.374336
SM(32:2)	0.560221	0.936737
PC(P-32:0)	0.536433	1.12336
LPC(20:5)	0.535508	1.19025
Cer(d16:1/24:0)	0.523533	0.959131
PC(40:7)	0.517	1.12302
Cer(d18:2/24:0)	0.493434	1.10804
PC(O-38:6)	0.4931	0.513264
PE(P-16:0/20:4)	0.492664	0.944993
LPC(O-16:0)	0.491841	1.03947
LPC(14:0)	0.479419	1.05564
Sphinganine	0.455927	1.04584
SM(36:0)	0.451417	0.9136
DG(36:2).2	0.440847	1.06425
LPC(20:3)	0.438712	0.75639
SM(42:1)	0.433917	0.79556
SM(41:1)	0.415266	0.630793
PE(P-18:0/20:4)	0.413842	0.935509
LPC(16:0)	0.401297	1.12419
Cer(m18:0/24:0)	0.400888	1.13593
PC(36:2)	0.389651	1.10309
LPE(18:0)	0.378131	1.06934
DG(36:2)	0.370238	1.03807
Hex2Cer(d18:1/22:0)	0.357122	0.775416
LPE(P-18:0)	0.315972	1.1025
Cer(m18:0/23:0)	0.312031	1.14205
PE(34:0)	0.288356	0.71921
Hex2Cer(d18:1/24:0)	0.272998	0.76139
LPC(P-16:0)	0.26279	0.597035
LPE(P-16:0)	0.25756	0.895526
LPC(O-22:6)	0.227284	1.09882
PE(P-18:0/22:6)	0.200903	1.13102
PI(40:6)	0.194416	1.08077
LPC(17:0)	0.179457	1.20295
Cer(d18:1/18:0)	0.165489	1.14837
Cer(d16:1/22:0)	0.162708	0.914569
PI(40:5)	0.159364	0.995357
LPC(18:3)	0.12076	1.13048
PE(P-18:1/20:4)	0.119698	0.93324
PI(36:4)	0.11836	1.01929
Hex2Cer(d18:1/24:1)	0.116556	0.784537
Cer(d19:1/22:0)	0.093061	0.861539
TG(58:9).1	0.0929224	1.06192
PG(34:0)	0.0870497	1.18351
LPE(16:0)	0.0654685	0.98986
PG(34:1)	0.0601215	1.14256
Cer(d18:2/24:1)	0.0528263	0.898013
Hex2Cer(d18:1/16:0)	0.0407095	0.809362
PE(36:4)	0.03562	1.06778
PI(36:3)	0.0334726	1.16972
DG(36:4)	0.0083404	0.99364
PE(38:5)	0.00220618	1.13642

## Sheet: LION
Supplementary table 6c: Differential lipid ontologies for DKC1-High vs DKC1-Low tumor tissues.
Term ID	Description	Annotated	p-value	FDR q-value	ES	Regulated
LION:0012080	endoplasmic reticulum (ER)	107	1.1e-16	1.17e-14	0.55233	UP
LION:0000002	glycerolipids [GL]	91	4.5e-13	2.39e-11	-0.502695	DOWN
LION:0000622	triacylglycerols [GL0301]	71	1.9e-12	6.15e-11	-0.522718	DOWN
LION:0012011	lipid storage	78	2.9e-12	6.15e-11	-0.504827	DOWN
LION:0012084	lipid droplet	78	2.9e-12	6.15e-11	-0.504827	DOWN
LION:0000094	headgroup with neutral charge	106	2.4e-10	4.24e-09	-0.433697	DOWN
LION:0000003	glycerophospholipids [GP]	86	2e-09	3.03e-08	0.429658	UP
LION:0002966	fatty acid with less than 2 double bonds	73	5.2e-09	6.89e-08	0.438121	UP
LION:0002968	saturated fatty acid	57	2.8e-08	3.3e-07	0.453844	UP
LION:0012081	mitochondrion	33	3.7e-08	3.92e-07	0.536716	UP
LION:0012010	membrane component	132	2.4e-07	2.31e-06	0.359195	UP
LION:0000011	glycerophosphoethanolamines [GP02]	31	3.9e-07	3.45e-06	0.516129	UP
LION:0000464	negative intrinsic curvature	70	7.4e-07	6.03e-06	0.383949	UP
LION:0000084	ceramide phosphocholines (sphingomyelins) [SP0301]	18	4.3e-06	3.26e-05	-0.592754	DOWN
LION:0000466	positive intrinsic curvature	34	3.1e-05	0.000219	0.42221	UP
LION:0012441	N-acylsphingosines (ceramides) [SP0201]	25	4e-05	0.000265	0.473004	UP
LION:0080948	d18:0 (dihydrosphingosine)	4	5e-05	0.000312	0.938525	UP
LION:0002948	fatty acid with 16-18 carbons	49	0.00019	0.00112	0.336171	UP
LION:0000095	headgroup with positive charge / zwitter-ion	89	0.00026	0.00145	0.280122	UP
LION:0002945	fatty acid with more than 18 carbons	54	0.00029	0.00154	0.323406	UP
LION:0012009	lipid-mediated signalling	65	0.00041	0.00207	0.297436	UP
LION:0000100	fatty acid with 18 carbons or less	52	0.00045	0.00217	0.319466	UP
LION:0012086	endosome/lysosome	25	0.00081	0.00373	-0.403767	DOWN
LION:0000040	1-(1z-alkenyl),2-acylglycerophosphoethanolamines [GP0203]	12	0.00095	0.0042	0.549435	UP
LION:0000047	diacylglycerophosphoinositols [GP0601]	11	0.00222	0.00941	0.539701	UP
LION:0001738	high transition temperature	10	0.00246	0.01	-0.557983	DOWN
LION:0002955	fatty acid with 16 carbons	17	0.00259	0.0102	0.440794	UP
LION:0000093	headgroup with negative charge	15	0.0032	0.0121	0.458655	UP
LION:0000743	TG(48:1)	5	0.00345	0.0126	-0.73251	DOWN
LION:0001740	above average transition temperature	20	0.00377	0.0133	-0.399123	DOWN
LION:0000453	simple glc series [SP0501]	8	0.00395	0.0135	0.595833	UP
LION:0002882	C16:0	16	0.00497	0.0165	0.431034	UP
LION:0002950	fatty acid with 22-24 carbons	42	0.00527	0.0169	0.285021	UP
LION:0000744	TG(48:2)	6	0.00543	0.0169	-0.657025	DOWN
LION:0012082	plasma membrane	45	0.00681	0.0206	-0.271812	DOWN
LION:0012216	d18:2	4	0.00938	0.0276	0.745902	UP
LION:0000753	TG(50:3)	5	0.01182	0.0339	-0.666667	DOWN
LION:0000599	lysoglycerophospholipids	20	0.01303	0.0363	0.357895	UP
LION:0000465	neutral intrinsic curvature	25	0.01365	0.0371	-0.323049	DOWN
LION:0012018	dihexosylceramides	4	0.01546	0.041	0.713115	UP
LION:0000752	TG(50:2)	5	0.01775	0.0459	-0.641975	DOWN
LION:0002921	C18:0	15	0.01827	0.0461	0.392275	UP
LION:0022266	C23:0	4	0.01978	0.0472	0.696721	UP
LION:0000004	sphingolipids [SP]	55	0.02	0.0472	0.231936	UP
LION:0080977	low lateral diffusion	6	0.02004	0.0472	0.584022	UP
LION:0080978	average lateral diffusion	9	0.02068	0.0477	0.48675	UP
LION:0000760	TG(52:1)	6	0.02212	0.0493	-0.578512	DOWN
LION:0000038	diacylglycerophosphoethanolamines [GP0201]	11	0.02234	0.0493	0.440736	UP
LION:0001734	contains vinyl ether bond (plasmalogen)	17	0.02328	0.0504	0.361345	UP
LION:0002967	polyunsaturated fatty acid	28	0.02388	0.0506	0.29026	UP
LION:0002957	fatty acid with 18 carbons	33	0.02739	0.0569	0.266667	UP
LION:0080947	d18:1 (sphingosine)	20	0.02911	0.0593	0.32807	UP
LION:0012125	d16:1	3	0.03012	0.0602	0.759184	UP
LION:0002959	fatty acid with 20 carbons	12	0.03143	0.0617	0.408192	UP
LION:0002977	fatty acid with 3-5 double bonds	15	0.03797	0.0732	0.360229	UP
LION:0000607	diacylglycerols [GL0201]	20	0.03966	0.0743	-0.315789	DOWN
LION:0001735	very low transition temperature	4	0.03995	0.0743	-0.647541	DOWN
LION:0000763	TG(52:4)	5	0.04099	0.0749	-0.584362	DOWN
LION:0000034	monoacylglycerophosphocholines [GP0105]	14	0.04495	0.0808	0.363858	UP
LION:0000563	steryl esters [ST0102]	7	0.04752	0.084	0.493776	UP
LION:0002971	fatty acid with 3 double bonds	4	0.04958	0.0862	0.631148	UP
LION:0002931	C22:0	11	0.05404	0.0924	0.395857	UP
LION:0002923	C18:2	6	0.05897	0.0977	0.513774	UP
LION:0002970	fatty acid with 2 double bonds	6	0.05897	0.0977	0.513774	UP
LION:0000764	TG(52:5)	5	0.06002	0.0979	-0.555556	DOWN
LION:0080971	high bilayer thickness	8	0.06569	0.106	0.445833	UP
LION:0000762	TG(52:3)	4	0.06721	0.106	-0.606557	DOWN
LION:0080981	below average lateral diffusion	10	0.07041	0.11	0.397479	UP
LION:0000087	gangliosides [SP0601]	4	0.074	0.114	-0.598361	DOWN
LION:0002938	C24:0	10	0.07979	0.121	0.389916	UP
LION:0002976	fatty acid with more than 3 double bonds	22	0.09105	0.136	0.268302	UP
LION:0012017	hexosylceramides	4	0.09311	0.137	0.577869	UP
LION:0002963	fatty acid with 24 carbons	19	0.1011	0.147	0.281774	UP
LION:0000773	TG(54:2)	5	0.11611	0.166	-0.502058	DOWN
LION:0000010	glycerophosphocholines [GP01]	40	0.12151	0.172	0.199038	UP
LION:0001737	average transition temperature	12	0.13339	0.186	0.329096	UP
LION:0000030	diacylglycerophosphocholines [GP0101]	15	0.13963	0.192	-0.294993	DOWN
LION:0002930	C20:5	4	0.14662	0.199	0.532787	UP
LION:0080970	average bilayer thickness	12	0.15265	0.205	0.320621	UP
LION:0000789	TG(56:6)	3	0.17559	0.231	0.583673	UP
LION:0000776	TG(54:5)	4	0.17653	0.231	-0.512295	DOWN
LION:0000032	1-(1z-alkenyl),2-acylglycerophosphocholines [GP0103]	5	0.22503	0.29	-0.439506	DOWN
LION:0000777	TG(54:6)	4	0.22734	0.29	-0.483607	DOWN
LION:0000775	TG(54:4)	3	0.30946	0.391	-0.514286	DOWN
LION:0001741	below average transition temperature	16	0.31958	0.399	-0.237069	DOWN
LION:0080973	below average bilayer thickness	10	0.3459	0.421	-0.285714	DOWN
LION:0080979	high lateral diffusion	10	0.3459	0.421	-0.285714	DOWN
LION:0000640	DG(34:2)	4	0.35956	0.433	-0.430328	DOWN
LION:0080982	above average lateral diffusion	13	0.36925	0.437	-0.248773	DOWN
LION:0000042	monoacylglycerophosphoethanolamines [GP0205]	6	0.37067	0.437	0.352617	UP
LION:0001739	very high transition temperature	10	0.37619	0.438	-0.278151	DOWN
LION:0002922	C18:1	12	0.39982	0.461	-0.251412	DOWN
LION:0000778	TG(54:7)	3	0.4593	0.524	0.453061	UP
LION:0080980	very high lateral diffusion	4	0.47287	0.533	-0.393443	DOWN
LION:0080969	low bilayer thickness	8	0.48562	0.542	-0.283333	DOWN
LION:0002969	monounsaturated fatty acid	21	0.49472	0.546	0.181036	UP
LION:0002972	fatty acid with 4 double bonds	6	0.51768	0.566	0.312672	UP
LION:0002961	fatty acid with 22 carbons	19	0.55073	0.593	0.181108	UP
LION:0002973	fatty acid with 5 double bonds	5	0.5534	0.593	0.330864	UP
LION:0002939	C24:1	8	0.67839	0.719	0.241667	UP
LION:0002929	C20:4	5	0.69329	0.728	0.295473	UP
LION:0080976	very low lateral diffusion	4	0.73312	0.762	-0.315574	DOWN
LION:0001736	low transition temperature	12	0.74199	0.764	-0.189266	DOWN
LION:0000647	DG(36:2)	3	0.79101	0.806	0.331973	UP
LION:0002937	C22:6	7	0.83217	0.84	-0.219917	DOWN
LION:0000035	monoalkylglycerophosphocholines [GP0106]	3	0.84723	0.847	0.315646	UP
