# Supplementary material for: Canonical WNT signaling-driven DKC1 dysregulates sphingolipid biosynthesis and drives colorectal cancer.
Source: Research Square preprint supplement (doi:10.21203/rs.3.rs-3180701/v1), 2023-12-04
Supplement: Supplementary file 3 [file 6ceb1ebf17b8e0d974f1e849.xlsx]

## Sheet: Sheet1
Supplementary table 4: Overlap of upregulated genes from patient microarray analysis with gene signatures associated with different cell types as reported in the original study (Sadanandam et. al, Nature Medicine, 2013).
Upregulated genes in DKC1 high group = 265
Cell Type	Only SetA	Only SetB	Overlap	Universe	Overlap %
UpRegulated
Goblet	264	140	1	405	0.246914
Inflammatory	235	262	3	500	0.6
Stem	265	263	2	530	0.377358
TA	206	153	59	418	14.1148
Enterocyte	265	168	0	433	0
Downregulated
Goblet	211	42	9	262	3.43511
Inflammatory	233	43	8	284	2.8169
Stem	223	32	19	274	6.93431
TA	329	19	32	380	8.42105
Enterocyte	118	48	3	169	1.77515
