# Supplementary material for: Canonical WNT signaling-driven DKC1 dysregulates sphingolipid biosynthesis and drives colorectal cancer.
Source: Research Square preprint supplement (doi:10.21203/rs.3.rs-3180701/v1), 2023-12-04
Supplement: Supplementary file 4 [file 8777ce3071ce466da0e72233.xlsx]

## Sheet: UP
Supplementary table 1a: Upregulated genes obtained after linear analysis of the microarray for DKC1 high vs DKC1 low patients.
id	logFC	AveExpr	t	P.Value	adj.P.Val	B
DKC1 /// MIR664B /// SNORA56	1.6042	9.5614	60.237	1.1122e-293	2.6156e-289	661.18
UTP14A	1.4691	8.3582	41.202	5.8757e-197	6.9092e-193	439.86
HAUS7	1.2138	7.4319	33.978	2.3783e-155	1.1186e-151	344.45
POLA1	1.1942	7.6114	32.584	4.4404e-147	1.3161e-143	325.47
FAM122B	1.3601	6.8108	32.584	4.4768e-147	1.3161e-143	325.46
HAUS7 /// TREX2	1.4204	6.1804	31.291	2.3733e-139	6.2017e-136	307.74
NKAP	1.0371	7.1316	30.913	4.3457e-137	1.022e-133	302.55
PSMA7	1.242	8.9872	30.632	2.1115e-135	3.8199e-132	298.68
AIFM1	1.0336	8.6491	29.965	2.159e-131	3.6269e-128	289.47
ENOX2	1.0665	5.5351	29.953	2.5424e-131	3.9862e-128	289.31
CSE1L	1.1737	9.7309	29.82	1.6142e-130	2.3727e-127	287.47
NUFIP1	1.2766	7.1584	29.802	2.0612e-130	2.8515e-127	287.23
JADE3	1.4778	6.9502	29.337	1.3008e-127	1.6102e-124	280.8
NSDHL	1.1113	7.5322	29.062	5.933e-126	6.9766e-123	276.99
TXLNG	1.1369	8.4299	29.054	6.5917e-126	7.3821e-123	276.89
MYC	1.4181	10.702	28.709	7.9451e-124	7.7855e-121	272.11
PQBP1	1.1685	8.2747	28.536	8.7967e-123	7.9569e-120	269.72
PUS7	1.2648	8.3953	28.076	5.2295e-120	4.0995e-117	263.35
CMSS1	1.0826	8.2395	27.948	3.1269e-119	2.2981e-116	261.57
EBPL	1.012	10.402	27.849	1.2369e-118	8.5555e-116	260.2
AHCY	1.1321	10.163	27.844	1.3216e-118	8.8807e-116	260.13
NUDT1	1.0531	7.0621	27.526	1.0915e-116	6.7553e-114	255.73
KIF4A	1.3178	7.5512	27.501	1.5618e-116	9.4178e-114	255.37
ADRM1	1.0006	9.5414	27.399	6.3738e-116	3.6561e-113	253.97
DUS3L	1.015	6.6853	27.342	1.4078e-115	7.8833e-113	253.18
AURKA	1.49	8.4854	26.532	1.0919e-110	4.7552e-108	241.96
TPX2	1.4617	8.9637	26.474	2.4504e-110	1.0478e-107	241.15
CCDC22	1.1046	6.8695	26.19	1.2605e-108	4.4247e-106	237.23
PRPS1	1.2093	7.0563	26.129	2.9158e-108	1.0085e-105	236.39
RFC3	1.6827	6.9532	26.113	3.6569e-108	1.2464e-105	236.16
MRPS17	1.0228	9.0801	26.078	5.9336e-108	1.9654e-105	235.68
PIGU	1.1344	8.1777	25.983	2.2029e-107	7.0969e-105	234.38
MYBL2	1.0467	7.5134	25.787	3.34e-106	9.8188e-104	231.67
MCM7	1.1849	8.9957	25.769	4.2778e-106	1.242e-103	231.42
ZDHHC9	1.1959	9.2388	25.756	5.1842e-106	1.4869e-103	231.23
TAF4	1.0585	8.0947	25.671	1.6778e-105	4.6973e-103	230.06
UCHL3	1.0606	9.5506	25.606	4.1478e-105	1.1476e-102	229.15
BORA	1.1498	7.2451	25.397	7.4623e-104	1.95e-101	226.27
NELFCD	1.0389	9.552	25.38	9.3905e-104	2.4005e-101	226.04
SKA3	1.0206	5.9663	25.337	1.6997e-103	4.2524e-101	225.45
LMNB2	1.2032	7.6407	25.264	4.6872e-103	1.1483e-100	224.44
UBE2C	1.533	9.3774	25.23	7.5579e-103	1.8324e-100	223.97
TP53RK	1.3619	7.6338	25.227	7.8122e-103	1.8748e-100	223.93
RNASEH2A	1.0837	7.9351	25.223	8.3321e-103	1.9595e-100	223.87
C1orf112	1.1521	5.7943	25.054	8.5431e-102	1.9506e-99	221.55
ZNF280C	1.0154	5.3996	25.04	1.0444e-101	2.3617e-99	221.35
CTPS2	1.0459	7.7843	24.969	2.7574e-101	6.1178e-99	220.38
LOC729680	1.5102	7.8108	24.942	4.0326e-101	8.7008e-99	220
BRCA1	1.1857	6.3325	24.877	9.947e-101	2.1075e-98	219.1
MED30	1.1314	8.0051	24.861	1.2374e-100	2.5983e-98	218.88
RAE1	1.024	9.4092	24.599	4.6227e-99	9.2132e-97	215.28
LOC101060264	1.5811	5.9103	24.266	4.5657e-97	8.3237e-95	210.7
CENPJ	1.2617	6.9931	24.215	9.1563e-97	1.6438e-94	210
THOC2	1.0121	6.9027	24.196	1.1939e-96	2.1272e-94	209.74
TOP1MT	1.1805	7.5926	24.182	1.434e-96	2.5357e-94	209.56
DSCC1	1.1385	7.173	23.984	2.2131e-95	3.6654e-93	206.83
YAE1D1	1.0862	8.7022	23.879	9.3241e-95	1.4816e-92	205.4
SLC5A6	1.0364	8.5703	23.87	1.0594e-94	1.6722e-92	205.27
FIGNL1	1.0519	5.9683	23.553	8.2437e-93	1.1679e-90	200.93
DUS4L	1.0083	6.6378	23.372	9.8663e-92	1.3335e-89	198.46
ERCC6L	1.0673	5.7739	23.29	3.0258e-91	3.9978e-89	197.34
BRCC3	1.4136	6.732	23.218	8.112e-91	1.0599e-88	196.36
SCML1	1.3744	8.1098	23.019	1.2269e-89	1.5107e-87	193.65
TEAD4	1.184	6.6727	23.004	1.5098e-89	1.8303e-87	193.44
C16orf13	1.0123	7.7652	22.869	9.57e-89	1.0873e-86	191.6
KIF15	1.1901	6.5664	22.84	1.42e-88	1.5903e-86	191.21
PHF19	1.0625	7.6341	22.653	1.8035e-87	1.928e-85	188.68
DIAPH3	1.0092	7.4618	22.627	2.5861e-87	2.7274e-85	188.32
MCM8	1.2956	6.161	22.485	1.7732e-86	1.7746e-84	186.4
CENPI	1.1653	5.443	22.457	2.6019e-86	2.582e-84	186.02
MED14	1.0445	7.57	22.383	7.1617e-86	6.8746e-84	185.01
CHD7	1.0071	7.787	22.171	1.2698e-84	1.1711e-82	182.14
MIPEP	1.0878	7.2732	22.09	3.7906e-84	3.3018e-82	181.05
PROSER1	1.1898	8.613	22.078	4.4612e-84	3.8715e-82	180.89
TSPAN6	1.3414	10.254	21.945	2.7142e-83	2.2012e-81	179.09
MIR1292 /// NOP56 /// SNORD110 /// SNORD57 /// SNORD86	1.1232	9.3002	21.927	3.4723e-83	2.7966e-81	178.84
ARMC10	1.138	8.0819	21.917	3.9449e-83	3.1664e-81	178.72
ASCL2	2.0846	8.8291	21.901	4.9456e-83	3.9428e-81	178.49
GINS1	1.3352	8.3204	21.833	1.2335e-82	9.5335e-81	177.58
FAM199X	1.0372	7.8797	21.777	2.6401e-82	1.9965e-80	176.82
CPNE1	1.1096	8.7323	21.736	4.5881e-82	3.4255e-80	176.27
MIR17 /// MIR17HG /// MIR18A /// MIR19A /// MIR19B1 /// MIR20A /// MIR92A1	1.2798	5.296	21.698	7.6241e-82	5.6385e-80	175.77
C8orf33	1.1643	8.3697	21.686	8.9864e-82	6.6045e-80	175.6
CSTF2	1.0204	5.0242	21.644	1.5742e-81	1.1219e-79	175.04
RAD54B	1.1073	6.356	21.582	3.6387e-81	2.5096e-79	174.21
SNHG17	1.2829	7.6075	21.51	9.6346e-81	6.4739e-79	173.24
ARFGEF2	1.097	5.7019	21.504	1.0493e-80	7.0306e-79	173.15
DBF4	1.0907	7.4625	21.493	1.2178e-80	8.1137e-79	173
MRGBP	1.0433	7.7558	21.465	1.7564e-80	1.1635e-78	172.64
PRMT3	1.0605	7.5724	21.317	1.2955e-79	8.19e-78	170.65
MRPL4	1.1366	7.7501	21.277	2.2101e-79	1.3824e-77	170.12
TRIP13	1.1338	7.7531	21.203	5.9853e-79	3.6657e-77	169.12
ETV4	1.2285	6.6803	21.018	7.1368e-78	4.1138e-76	166.65
EXOSC3	1.0459	6.9461	20.977	1.2408e-77	6.981e-76	166.1
PLAGL2	1.2437	7.6861	20.97	1.3558e-77	7.61e-76	166.01
ARID3A	1.0901	6.3848	20.91	3.0157e-77	1.661e-75	165.22
HRSP12	1.0255	8.0875	20.86	5.9326e-77	3.2148e-75	164.54
GINS2	1.1481	7.9689	20.842	7.4701e-77	4.0019e-75	164.31
RNF43	1.5062	9.0036	20.757	2.3249e-76	1.2178e-74	163.18
XIAP	1.0929	7.4267	20.718	3.9295e-76	2.0445e-74	162.66
PRKDC	1.0588	8.1425	20.712	4.2386e-76	2.1909e-74	162.58
CARM1	1.0227	8.0119	20.694	5.3737e-76	2.7594e-74	162.35
TMTC4	1.0334	5.793	20.68	6.5196e-76	3.326e-74	162.15
CDC25C	1.0003	5.734	20.673	7.1505e-76	3.6164e-74	162.06
CENPA /// SLC35F6	1.1969	7.4191	20.614	1.5643e-75	7.7616e-74	161.28
HSPH1	1.0976	5.935	20.54	4.2279e-75	2.0501e-73	160.29
CEP41	1.009	6.1125	20.493	7.9007e-75	3.7766e-73	159.67
BOP1 /// MIR7112	1.1985	7.499	20.476	9.8972e-75	4.7118e-73	159.44
WDR4	1.1635	7.8661	20.471	1.0467e-74	4.9731e-73	159.39
EZH2	1.0783	7.4642	20.445	1.4956e-74	6.9926e-73	159.03
TUBGCP3	1.0462	5.004	20.365	4.2852e-74	1.9343e-72	157.98
SQLE	1.4863	5.9373	20.346	5.551e-74	2.4914e-72	157.73
BRCA2	1.047	4.9087	20.342	5.8165e-74	2.6006e-72	157.68
HNF4A	1.2175	6.5152	20.25	1.9853e-73	8.6947e-72	156.46
FLVCR1	1.2301	6.964	20.205	3.5949e-73	1.5541e-71	155.86
TCFL5	1.182	7.8171	20.2	3.8359e-73	1.6553e-71	155.8
SPC25	1.3325	5.7576	20.194	4.1505e-73	1.7878e-71	155.72
AURKB	1.1222	6.5196	20.134	9.1995e-73	3.8913e-71	154.93
BUB1	1.2705	6.8426	20.117	1.1474e-72	4.8101e-71	154.71
FAM217B	1.0409	7.3867	20.059	2.4604e-72	1.0187e-70	153.95
MTFR2	1.1236	6.9792	19.881	2.6003e-71	1.0209e-69	151.6
FITM2	1.0436	7.8178	19.849	3.9459e-71	1.5288e-69	151.18
PPP1R3D	1.0254	6.7992	19.842	4.3495e-71	1.6824e-69	151.09
CASK	1.1573	5.7139	19.812	6.4199e-71	2.451e-69	150.7
PRPF6	1.0555	6.7765	19.804	7.1563e-71	2.7233e-69	150.59
CDC6	1.4501	6.3598	19.75	1.4488e-70	5.4342e-69	149.89
NUP62CL	1.1993	5.5059	19.701	2.7472e-70	1.0172e-68	149.25
UBE2S	1.1388	8.8731	19.682	3.5447e-70	1.3026e-68	149
MKI67	1.2097	8.0353	19.676	3.8096e-70	1.3912e-68	148.92
CHMP4B	1.0184	8.5503	19.644	5.8586e-70	2.1296e-68	148.5
FANCI	1.0091	7.3033	19.634	6.63e-70	2.3952e-68	148.37
PARPBP	1.1166	5.5087	19.589	1.2018e-69	4.2824e-68	147.78
FGFR4	1.1714	7.2648	19.587	1.2349e-69	4.3869e-68	147.75
EPHB2	1.099	8.5716	19.371	2.0863e-68	7.0699e-67	144.94
SLC7A5	1.1442	8.7123	19.285	6.3782e-68	2.1187e-66	143.82
LSM5	1.0141	6.6606	19.191	2.1659e-67	6.9586e-66	142.61
LY6G6D /// LY6G6F	2.3789	7.1302	19.149	3.7417e-67	1.1875e-65	142.06
TRIB3	1.1077	8.467	18.976	3.5324e-66	1.0775e-64	139.82
E2F5	1.0354	6.3973	18.818	2.7375e-65	7.9876e-64	137.78
PIGW	1.0107	6.6029	18.759	5.9213e-65	1.6839e-63	137.02
ZNRF3	1.2706	7.928	18.75	6.6161e-65	1.8769e-63	136.91
DNTTIP1	1.0538	8.6522	18.662	2.0691e-64	5.718e-63	135.77
FOXM1	1.0446	7.2864	18.645	2.5602e-64	7.0256e-63	135.56
GPALPP1	1.0694	6.9128	18.561	7.5826e-64	2.0311e-62	134.48
ASB9	1.2212	5.5867	18.552	8.5115e-64	2.2721e-62	134.36
CCNB2	1.0061	8.6557	18.542	9.5926e-64	2.5549e-62	134.24
GPR143	1.0953	5.7803	18.277	2.8841e-62	7.0729e-61	130.85
ASNS	1.0051	8.8731	18.275	2.9792e-62	7.2985e-61	130.82
AGMAT	1.4219	8.4933	18.239	4.6726e-62	1.1282e-60	130.37
CCNA2	1.1198	7.408	18.23	5.2497e-62	1.265e-60	130.26
NEK3	1.1146	6.0967	18.145	1.5488e-61	3.6243e-60	129.18
ATAD2	1.1474	6.8924	18.139	1.6801e-61	3.92e-60	129.1
NCR3LG1 /// RP1-239B22.5	1.1312	7.013	18.13	1.8785e-61	4.3741e-60	128.99
ABHD11	1.0797	4.8199	18.075	3.8035e-61	8.7269e-60	128.28
BUB1B	1.036	8.081	18.073	3.8965e-61	8.923e-60	128.26
PM20D2	1.2275	8.5186	17.96	1.6344e-60	3.6365e-59	126.83
AKIRIN2	1.0271	4.9482	17.944	1.9968e-60	4.4303e-59	126.63
SPIN3	1.3221	5.5647	17.817	1.0068e-59	2.1506e-58	125.02
KIF23	1.1348	6.229	17.797	1.3013e-59	2.7597e-58	124.77
GTSE1	1.0245	6.4439	17.795	1.3259e-59	2.8042e-58	124.75
MST4	1.2294	5.8772	17.748	2.4062e-59	5.0167e-58	124.15
MND1	1.175	5.5577	17.687	5.1943e-59	1.065e-57	123.39
CAPN10	1.1692	4.6823	17.625	1.135e-58	2.2874e-57	122.61
DEPDC1B	1.2752	6.1879	17.472	7.7277e-58	1.486e-56	120.7
CDC20	1.0651	8.3498	17.412	1.6438e-57	3.1076e-56	119.95
CHEK1	1.1585	6.0698	17.303	6.4603e-57	1.1805e-55	118.58
SLCO4A1	1.0344	8.321	17.298	6.8364e-57	1.2473e-55	118.53
TTK	1.1219	7.2131	17.275	9.1368e-57	1.6513e-55	118.24
DDC	1.0613	5.7988	17.142	4.8221e-56	8.3326e-55	116.58
MAD2L1	1.2564	8.226	16.995	2.9872e-55	4.9197e-54	114.77
CACNA1D	1.171	5.5519	16.883	1.2021e-54	1.9077e-53	113.38
CDCA7	1.0827	5.2611	16.73	7.942e-54	1.2082e-52	111.5
RRM2	1.0085	9.9123	16.671	1.6309e-53	2.4493e-52	110.79
AMACR /// C1QTNF3-AMACR	1.4149	7.2655	16.614	3.2899e-53	4.8601e-52	110.09
ARSE	1.4283	7.6846	16.515	1.1115e-52	1.5968e-51	108.87
OIP5	1.1007	6.6512	16.456	2.2816e-52	3.2422e-51	108.16
RNF157	1.1209	6.0578	16.421	3.5191e-52	4.9499e-51	107.73
HUNK	1.1364	6.6524	16.379	5.8347e-52	8.0957e-51	107.22
MTMR1	1.0397	5.3475	16.352	8.0978e-52	1.1163e-50	106.9
LRP8	1.1038	6.0068	16.254	2.6755e-51	3.5914e-50	105.71
CEP55	1.1916	7.402	16.169	7.4736e-51	9.8302e-50	104.69
ANLN	1.191	7.3559	16.15	9.3961e-51	1.2304e-49	104.46
PABPC1L	1.204	7.1388	16.136	1.1165e-50	1.4531e-49	104.29
CLDN1	1.073	5.77	16.132	1.1785e-50	1.5313e-49	104.23
HELLS	1.0237	6.0703	16.028	4.1065e-50	5.1812e-49	102.99
GABRE /// MIR224 /// MIR452	1.26	6.792	16.018	4.6527e-50	5.8514e-49	102.87
REPIN1	1.0862	4.9724	15.877	2.5469e-49	3.0732e-48	101.17
GGH	1.1741	9.9351	15.855	3.3115e-49	3.9533e-48	100.91
PLA2G12B	1.2078	5.1754	15.722	1.6315e-48	1.8671e-47	99.326
EIF3B	1.1804	6.1632	15.685	2.5311e-48	2.8605e-47	98.889
NUF2	1.1148	6.5385	15.658	3.4939e-48	3.9109e-47	98.568
CCDC113	1.0168	5.3596	15.645	4.0911e-48	4.5621e-47	98.411
KRT23	2.2	7.5792	15.587	8.1621e-48	8.9407e-47	97.723
KIAA0226L	1.7255	8.571	15.558	1.1482e-47	1.2479e-46	97.384
ZFAS1	1.1467	6.5331	15.53	1.6101e-47	1.7378e-46	97.047
MYB	1.0126	9.3405	15.518	1.8396e-47	1.9782e-46	96.915
HKDC1	1.1198	7.7316	15.513	1.9617e-47	2.1048e-46	96.851
AXIN2	1.4754	8.993	15.483	2.8035e-47	2.9766e-46	96.496
CCNB1	1.1431	7.0244	15.441	4.6044e-47	4.8472e-46	96.002
GPSM2	1.1043	7.6212	15.414	6.343e-47	6.6477e-46	95.683
NCAPG	1.0089	6.2545	15.365	1.1283e-46	1.1725e-45	95.11
FGGY	1.2645	7.0944	15.258	3.9789e-46	4.0196e-45	93.856
JPH1	1.0216	7.5019	15.11	2.2753e-45	2.2003e-44	92.122
TDGF1 /// TDGF1P3	1.6786	8.2763	15.085	3.0298e-45	2.9095e-44	91.837
GNG4	1.3353	6.3914	15.062	3.9797e-45	3.8016e-44	91.565
CYP4F3	1.2797	5.9372	14.984	9.8829e-45	9.2416e-44	90.66
SLC22A3	1.1669	5.1021	14.925	1.9684e-44	1.8111e-43	89.975
MAP7D2	1.5358	5.4862	14.894	2.8195e-44	2.5771e-43	89.618
CLDN3	1.2358	9.8644	14.848	4.8262e-44	4.3622e-43	89.083
UGGT2	1.177	5.6104	14.759	1.3507e-43	1.1933e-42	88.059
QPRT	1.2155	7.8163	14.686	3.1372e-43	2.7231e-42	87.221
ACE2	1.8091	6.7177	14.672	3.6777e-43	3.174e-42	87.063
FARP1	1.0467	6.7479	14.59	9.397e-43	7.9812e-42	86.13
DPEP1	1.4397	8.3385	14.531	1.8552e-42	1.5555e-41	85.453
CENPH	1.005	6.2972	14.523	2.0393e-42	1.7049e-41	85.359
AREG	1.5104	8.9468	14.475	3.5207e-42	2.9053e-41	84.816
CEL	2.1749	6.4334	14.441	5.2246e-42	4.2828e-41	84.424
KCTD14 /// NDUFC2-KCTD14	1.0374	7.2281	14.287	3.0153e-41	2.3844e-40	82.681
GPX2	1.0958	6.2799	14.16	1.2677e-40	9.778e-40	81.253
CHN2	1.2421	7.5696	14.08	3.1229e-40	2.3677e-39	80.356
SRPX2	1.1972	7.0316	14.074	3.3348e-40	2.5259e-39	80.291
GUCY2C	1.3531	7.479	14.062	3.8151e-40	2.8831e-39	80.157
NFE2L3	1.0146	6.6807	14.048	4.4572e-40	3.3554e-39	80.003
PROX1	1.267	6.5376	13.947	1.3864e-39	1.018e-38	78.874
DNAJC6	1.0355	5.3172	13.578	8.2967e-38	5.6086e-37	74.807
CFTR	1.3757	6.3121	13.494	2.1059e-37	1.3978e-36	73.881
PRR15	1.0133	8.6791	13.411	5.2055e-37	3.3884e-36	72.982
CXADR	1.0332	5.9775	13.122	1.2023e-35	7.2746e-35	69.862
EREG	1.9249	6.8346	13.066	2.1963e-35	1.3143e-34	69.263
FOXA2	1.0138	7.6501	13.001	4.4313e-35	2.6124e-34	68.566
NOX1	1.8079	8.3164	12.98	5.5191e-35	3.2353e-34	68.348
NR1I2	1.1766	7.4489	12.919	1.0642e-34	6.1536e-34	67.695
CYP2B6 /// CYP2B7P	1.1886	7.6932	12.862	1.9467e-34	1.1142e-33	67.095
PTPRO	1.4926	7.4132	12.856	2.0717e-34	1.184e-33	67.034
CELP	1.1805	6.5523	12.805	3.5696e-34	2.019e-33	66.493
GALNT6	1.0325	7.3336	12.759	5.8251e-34	3.2711e-33	66.007
VAV3	1.3964	6.0202	12.681	1.33e-33	7.3406e-33	65.187
EIF2S3	1.0832	8.4038	12.46	1.356e-32	7.1791e-32	62.881
LGR5	1.6134	7.9914	12.354	4.0783e-32	2.1159e-31	61.787
GDF15	1.1391	9.5741	12.301	7.0458e-32	3.614e-31	61.245
DEPDC7	1.0003	5.779	12.268	9.9413e-32	5.0672e-31	60.903
ACSL6	1.3336	4.9828	11.986	1.7958e-30	8.6331e-30	58.03
EPDR1	1.0222	7.936	11.842	7.6718e-30	3.582e-29	56.589
POF1B	1.0775	7.5267	11.564	1.2428e-28	5.5304e-28	53.826
DACH1	1.008	5.809	11.564	1.244e-28	5.5339e-28	53.825
LAPTM4B	1.102	8.7794	11.559	1.3009e-28	5.7834e-28	53.78
FABP6	1.094	6.5784	11.545	1.4934e-28	6.6242e-28	53.643
TOX3	1.0035	9.3208	11.418	5.2477e-28	2.2616e-27	52.397
APCDD1	1.2259	8.1224	11.178	5.4571e-27	2.25e-26	50.074
CKMT2	1.2014	5.6949	11.086	1.3278e-26	5.3811e-26	49.193
PSAT1	1.0054	8.4808	10.974	3.9232e-26	1.5559e-25	48.119
FOXQ1	1.0949	9.7927	10.889	8.8188e-26	3.4378e-25	47.316
PLCB4	1.1747	7.8494	10.604	1.2934e-24	4.807e-24	44.654
SLC35D3	1.3564	5.2332	10.541	2.3138e-24	8.5078e-24	44.078
LRP4	1.0897	7.3974	10.457	5.0639e-24	1.8362e-23	43.302
VSNL1	1.1006	6.2093	10.345	1.4207e-23	5.0516e-23	42.281
CCL15 /// CCL15-CCL14	1.0102	7.463	10.221	4.4026e-23	1.5394e-22	41.161
SATB2	1.0167	4.9295	10.166	7.2513e-23	2.5057e-22	40.667
GAL	1.0266	6.0553	10.133	9.7346e-23	3.3466e-22	40.375
GZMB	1.0089	7.0313	10.018	2.7419e-22	9.2476e-22	39.35
AZGP1	1.1187	7.1505	9.9168	6.7533e-22	2.2417e-21	38.458
ABAT	1.0267	6.9056	9.8051	1.8128e-21	5.8984e-21	37.481
SPINK1	1.2539	10.194	9.2349	2.4572e-19	7.2771e-19	32.627
PSPH	1.0001	6.4327	7.2387	1.0975e-12	2.4277e-12	17.539
FAM3B	1.0031	6.6637	6.6341	6.148e-11	1.2501e-10	13.594

## Sheet: DOWN
Supplementary table 1b: Downregulated genes obtained after linear analysis of the microarray for DKC1 high vs DKC1 low patients.
id	logFC	AveExpr	t	P.Value	adj.P.Val	B
LRRC25	-1.121	6.2996	-21.609	2.537e-81	1.7758e-79	174.57
LINC00491	-1.2008	7.9081	-20.225	2.7407e-73	1.1936e-71	156.13
GNAO1	-1.0022	8.3167	-19.873	2.8893e-71	1.1306e-69	151.49
ERVH-1	-1.1052	8.2555	-19.494	4.1889e-69	1.4638e-67	146.54
ZNF236	-1.0472	7.5838	-19.398	1.4694e-68	5.0302e-67	145.29
WHAMMP2	-1.0232	8.0397	-18.786	4.1423e-65	1.1895e-63	137.37
LINC00520	-1.299	7.7749	-18.759	5.8677e-65	1.6707e-63	137.03
VWA3A	-1.157	6.6971	-18.171	1.1196e-61	2.633e-60	129.5
SLC16A7	-1.0951	5.3142	-17.689	5.0538e-59	1.0371e-57	123.41
EGFR	-1.7656	6.6732	-17.577	2.0843e-58	4.1227e-57	122
SNHG17 /// SNORA71B	-1.3922	6.9174	-16.992	3.1122e-55	5.1184e-54	114.73
FGFR2	-1.2243	7.1054	-16.844	1.9452e-54	3.0519e-53	112.9
PTPRC	-1.4178	7.1027	-16.318	1.2239e-51	1.6715e-50	106.49
TCTE3	-1.1623	5.7117	-16.026	4.2282e-50	5.329e-49	102.96
GALNT1	-1.0011	9.3034	-16.019	4.6119e-50	5.8032e-49	102.87
KCTD12	-1.094	8.3481	-14.587	9.7511e-43	8.276e-42	86.093
MALAT1	-1.6362	9.0763	-14.041	4.8258e-40	3.6205e-39	79.924
EPHA4	-1.0092	5.0522	-13.111	1.3453e-35	8.1187e-35	69.75
CTSE	-1.3929	6.9172	-12.871	1.7653e-34	1.0118e-33	67.193
DPYD	-1.1348	6.5439	-12.423	1.9958e-32	1.0487e-31	62.497
RAB27B	-1.1126	7.6307	-12.045	9.7796e-31	4.7618e-30	58.633
CYP1B1	-1.3163	6.0382	-11.762	1.7237e-29	7.9223e-29	55.786
SLITRK6	-1.2337	5.4798	-11.639	5.891e-29	2.6536e-28	54.566
FCGBP	-1.7995	8.9108	-10.82	1.6862e-25	6.4904e-25	46.673
HOXC6	-1.324	5.719	-10.64	9.2201e-25	3.4457e-24	44.99
MT1M	-1.1276	5.681	-10.186	6.031e-23	2.0936e-22	40.849
SPON1	-1.1358	6.6002	-10.014	2.8403e-22	9.5754e-22	39.315
UGT2B15	-1.1193	6.4472	-9.4929	2.7402e-20	8.4562e-20	34.795
CXCL12	-1.1487	6.7584	-9.4518	3.8984e-20	1.1941e-19	34.446
SLC4A4	-1.3047	6.0579	-9.448	4.0295e-20	1.2333e-19	34.413
IGF1	-1.0163	5.657	-9.1928	3.4985e-19	1.0294e-18	32.277
SFRP2	-1.6053	8.0326	-8.9784	2.0754e-18	5.902e-18	30.519
REG4	-1.8311	7.8854	-8.8	8.8952e-18	2.4655e-17	29.082
ADH1B	-1.1824	5.4417	-8.5527	6.4423e-17	1.72e-16	27.128
MUC2	-1.3512	8.5633	-8.4216	1.8066e-16	4.7244e-16	26.111
AGR3	-1.3323	8.5987	-8.412	1.9483e-16	5.082e-16	26.037
GAS1	-1.1252	6.819	-8.3805	2.4908e-16	6.4727e-16	25.795
ZNF595	-1.2405	5.3668	-7.9396	7.1654e-15	1.7484e-14	22.485
HEPACAM2	-1.202	5.5713	-7.7366	3.202e-14	7.582e-14	21.012
CA2	-1.0655	8.2186	-7.4147	3.219e-13	7.2962e-13	18.743
MUC4	-1.1395	6.9587	-7.4116	3.2891e-13	7.4529e-13	18.722
FABP4	-1.0208	5.8567	-7.354	4.9267e-13	1.1076e-12	18.325
CLCA1	-1.5452	8.2158	-7.1185	2.5028e-12	5.4485e-12	16.73
SPINK4	-1.2935	8.7624	-6.9761	6.541e-12	1.3933e-11	15.788
PLA2G2A	-1.0931	9.5263	-6.9367	8.5098e-12	1.8025e-11	15.53
IGKV1-17 /// IGKV1-17	-1.0299	8.605	-6.7652	2.6344e-11	5.4578e-11	14.423
IGJ	-1.1139	9.4612	-6.7028	3.9497e-11	8.1118e-11	14.027
SI	-1.0883	5.2031	-6.5745	8.9955e-11	1.8144e-10	13.222
ITLN1	-1.2126	7.1152	-6.2707	5.9842e-10	1.1611e-09	11.371
CLCA4	-1.0306	5.8581	-5.6177	2.7036e-08	4.8253e-08	7.6612
UGT2B17	-1.0875	6.3465	-5.2446	2.0249e-07	3.4419e-07	5.7106

## Sheet: UP_BP
Supplementary table 1c: Upregulated biological processes associated with DKC1 high patients from combined patient data microarray analysis.
Category	Term	Count	%	PValue	Genes	List Total	Pop Hits	Pop Total	Fold Enrichment	Bonferroni	Benjamini	FDR
GOTERM_BP_DIRECT	GO:0051301~cell division	29	10.2837	4.33047e-13	GPSM2, ERCC6L, CDCA7, NCAPG, BUB1B, BRCC3, SKA3, AURKB, AURKA, CDC20, CCNB2, CCNB1, HAUS7, NUF2, OIP5, NEK3, RAE1, BUB1, HELLS, BORA, UBE2C, CDC6, CDC25C, CCNA2, TPX2, UBE2S, CENPJ, MAD2L1, SPC25	262	385	19357	5.56511	7.44495e-10	7.44407e-10	7.39644e-10
GOTERM_BP_DIRECT	GO:0007094~mitotic spindle assembly checkpoint	9	3.19149	7.80262e-09	CDC20, NUF2, BUB1B, TTK, TRIP13, BUB1, AURKB, MAD2L1, SPC25	262	32	19357	20.7792	1.34126e-05	6.70635e-06	6.66344e-06
GOTERM_BP_DIRECT	GO:0007052~mitotic spindle organization	9	3.19149	9.16157e-07	GPSM2, CCNB1, CENPH, KIF4A, NUF2, TTK, AURKB, AURKA, SPC25	262	57	19357	11.6655	0.00157364	0.000524958	0.000521599
GOTERM_BP_DIRECT	GO:0006260~DNA replication	11	3.90071	6.12874e-06	REPIN1, GINS2, POLA1, RFC3, RRM2, RNASEH2A, DBF4, MCM7, DSCC1, TOP1MT, CHEK1	262	122	19357	6.66146	0.01048	0.00263383	0.00261697
GOTERM_BP_DIRECT	GO:0060236~regulation of mitotic spindle organization	5	1.77305	0.000132015	GPSM2, TPX2, BORA, CENPJ, RAE1	262	20	19357	18.4704	0.203038	0.0453867	0.0450963
GOTERM_BP_DIRECT	GO:0000278~mitotic cell cycle	10	3.5461	0.000184377	TPX2, MYB, TUBGCP3, MYBL2, NEK3, CDC6, SKA3, AURKB, KIF15, AURKA	262	148	19357	4.99201	0.271649	0.0528239	0.0524859
GOTERM_BP_DIRECT	GO:0000281~mitotic cytokinesis	7	2.48227	0.000284478	ANLN, KIF4A, CHMP4B, KIF23, CENPA, AURKB, CEP55	262	67	19357	7.71898	0.386814	0.0698596	0.0694125
GOTERM_BP_DIRECT	GO:0007049~cell cycle	15	5.31915	0.000373188	FANCI, HELLS, ERCC6L, BORA, MCM7, MCM8, TXLNG, BRCA1, BRCC3, MKI67, CDC25C, AURKA, NUF2, OIP5, RAE1	262	357	19357	3.10427	0.473566	0.0801887	0.0796756
GOTERM_BP_DIRECT	GO:1903671~negative regulation of sprouting angiogenesis	5	1.77305	0.000512563	MIR92A1, MIR20A, MIR17, MIR18A, MIR19A	262	28	19357	13.1932	0.585765	0.0925218	0.0919298
GOTERM_BP_DIRECT	GO:0042127~regulation of cell proliferation	10	3.5461	0.000538231	GUCY2C, ACE2, SQLE, CHEK1, CDCA7, XIAP, FOXM1, LGR5, EZH2, TCFL5	262	171	19357	4.32057	0.603654	0.0925218	0.0919298
GOTERM_BP_DIRECT	GO:1900264~positive regulation of DNA-directed DNA polymerase activity	4	1.41844	0.000627075	GINS1, GINS2, RFC3, DSCC1	262	13	19357	22.7328	0.65982	0.0927278	0.0921344
GOTERM_BP_DIRECT	GO:0007059~chromosome segregation	7	2.48227	0.000647314	CENPH, NUF2, TTK, OIP5, BRCA1, SKA3, SPC25	262	78	19357	6.63041	0.671459	0.0927278	0.0921344
GOTERM_BP_DIRECT	GO:0048146~positive regulation of fibroblast proliferation	6	2.12766	0.000860832	CCNA2, CCNB1, MIR17, MYC, CDC6, EREG	262	55	19357	8.05982	0.772455	0.113828	0.1131
GOTERM_BP_DIRECT	GO:0097421~liver regeneration	5	1.77305	0.000971673	SLC7A5, MYC, CLDN1, EZH2, AURKA	262	33	19357	11.1942	0.811963	0.116174	0.11543
GOTERM_BP_DIRECT	GO:0000086~G2/M transition of mitotic cell cycle	6	2.12766	0.00101373	CCNA2, CCNB1, CHEK1, FOXM1, CDC25C, AURKA	262	57	19357	7.77702	0.825091	0.116174	0.11543
GOTERM_BP_DIRECT	GO:1901796~regulation of signal transduction by p53 class mediator	5	1.77305	0.00221039	BOP1, TP53RK, CHEK1, AURKB, AURKA	262	41	19357	9.00996	0.977716	0.237479	0.23596
GOTERM_BP_DIRECT	GO:0001556~oocyte maturation	4	1.41844	0.00308713	PABPC1L, TRIP13, BRCA2, EREG	262	22	19357	13.433	0.995083	0.312163	0.310165
GOTERM_BP_DIRECT	GO:0008283~cell proliferation	9	3.19149	0.00397042	BOP1, DACH1, MCM7, MYC, AXIN2, MKI67, CDC25C, BUB1, AURKB	262	187	19357	3.5558	0.998929	0.379175	0.376748
GOTERM_BP_DIRECT	GO:0006271~DNA strand elongation involved in DNA replication	3	1.06383	0.00480653	POLA1, RFC3, MCM7	262	8	19357	27.7056	0.999747	0.434864	0.432082
GOTERM_BP_DIRECT	GO:0000079~regulation of cyclin-dependent protein serine/threonine kinase activity	5	1.77305	0.00642825	CCNA2, CCNB2, CCNB1, CDC6, CDC25C	262	55	19357	6.71652	0.999985	0.543764	0.540285
GOTERM_BP_DIRECT	GO:0006281~DNA repair	11	3.90071	0.00664284	FANCI, POLA1, RFC3, PARPBP, HAUS7, TREX2, CHEK1, NUDT1, BRCA1, FOXM1, BRCA2	262	293	19357	2.77371	0.999989	0.543764	0.540285
GOTERM_BP_DIRECT	GO:0097104~postsynaptic membrane assembly	3	1.06383	0.00758854	LRP4, CEL, EPHB2	262	10	19357	22.1645	0.999998	0.592941	0.589147
GOTERM_BP_DIRECT	GO:0051256~mitotic spindle midzone assembly	3	1.06383	0.00919286	KIF4A, KIF23, AURKB	262	11	19357	20.1495	1	0.67452	0.670204
GOTERM_BP_DIRECT	GO:0010629~negative regulation of gene expression	11	3.90071	0.009436	MIR92A1, AKIRIN2, MIR19B1, SLC7A5, MIR20A, CLDN3, MIR17, MYC, CPNE1, MIR19A, AURKA	262	309	19357	2.63009	1	0.67452	0.670204
GOTERM_BP_DIRECT	GO:0045931~positive regulation of mitotic cell cycle	4	1.41844	0.00980978	CCNB1, ASNS, BRCA2, AURKA	262	33	19357	8.95536	1	0.67452	0.670204
GOTERM_BP_DIRECT	GO:0051983~regulation of chromosome segregation	3	1.06383	0.010934	MKI67, BUB1, AURKB	262	12	19357	18.4704	1	0.722905	0.718279
GOTERM_BP_DIRECT	GO:0010458~exit from mitosis	3	1.06383	0.012808	UBE2C, UBE2S, CHMP4B	262	13	19357	17.0496	1	0.786319	0.781287
GOTERM_BP_DIRECT	GO:0051444~negative regulation of ubiquitin-protein transferase activity	3	1.06383	0.012808	CDC20, BUB1B, MAD2L1	262	13	19357	17.0496	1	0.786319	0.781287
GOTERM_BP_DIRECT	GO:0008608~attachment of spindle microtubules to kinetochore	3	1.06383	0.0148109	NUF2, AURKB, SPC25	262	14	19357	15.8318	1	0.821291	0.816036
GOTERM_BP_DIRECT	GO:0001833~inner cell mass cell proliferation	3	1.06383	0.0148109	GINS1, CHEK1, BRCA2	262	14	19357	15.8318	1	0.821291	0.816036
GOTERM_BP_DIRECT	GO:1904668~positive regulation of ubiquitin protein ligase activity	3	1.06383	0.0148109	CDC20, UBE2C, UBE2S	262	14	19357	15.8318	1	0.821291	0.816036
GOTERM_BP_DIRECT	GO:0008284~positive regulation of cell proliferation	15	5.31915	0.0154078	SLC35F6, MIR19B1, AKIRIN2, TTK, PROX1, FOXM1, AREG, EREG, CDC20, MYC, CARM1, FGFR4, TDGF1, NOX1, EZH2	262	541	19357	2.04848	1	0.82769	0.822393
GOTERM_BP_DIRECT	GO:0043687~post-translational protein modification	5	1.77305	0.0162476	CCNA2, ASB9, UCHL3, PSMA7, AURKB	262	72	19357	5.13067	1	0.831952	0.826629
GOTERM_BP_DIRECT	GO:0071479~cellular response to ionizing radiation	4	1.41844	0.0165829	FIGNL1, BRCA1, BRCC3, BRCA2	262	40	19357	7.38817	1	0.831952	0.826629
GOTERM_BP_DIRECT	GO:2000001~regulation of DNA damage checkpoint	3	1.06383	0.0169391	BRCA1, BRCC3, BRCA2	262	15	19357	14.7763	1	0.831952	0.826629
GOTERM_BP_DIRECT	GO:0006302~double-strand break repair	5	1.77305	0.0177993	PRKDC, BRCA1, BRCC3, TRIP13, BRCA2	262	74	19357	4.99201	1	0.849919	0.84448
GOTERM_BP_DIRECT	GO:0045893~positive regulation of transcription, DNA-templated	18	6.38298	0.0188051	ATAD2, NR1I2, BRCA1, FOXM1, BRCA2, ETV4, PQBP1, CCNA2, MED14, MRGBP, MED30, MYC, HNF4A, CENPJ, MYB, E2F5, TAF4, FOXA2	262	722	19357	1.84193	1	0.85473	0.84926
GOTERM_BP_DIRECT	GO:0001942~hair follicle development	4	1.41844	0.0188945	NSDHL, LRP4, APCDD1, LGR5	262	42	19357	7.03635	1	0.85473	0.84926
GOTERM_BP_DIRECT	GO:0071732~cellular response to nitric oxide	3	1.06383	0.0215562	CCNA2, AIFM1, DPEP1	262	17	19357	13.0379	1	0.950132	0.944052
GOTERM_BP_DIRECT	GO:0035518~histone H2A monoubiquitination	3	1.06383	0.024038	BRCA1, BRCC3, BRCA2	262	18	19357	12.3136	1	1	0.994179
GOTERM_BP_DIRECT	GO:0007051~spindle organization	3	1.06383	0.024038	TTK, AURKB, AURKA	262	18	19357	12.3136	1	1	0.994179
GOTERM_BP_DIRECT	GO:0044818~mitotic G2/M transition checkpoint	3	1.06383	0.0266306	CHEK1, BRCA1, BRCC3	262	19	19357	11.6655	1	1	0.994179
GOTERM_BP_DIRECT	GO:0038018~Wnt receptor catabolic process	2	0.70922	0.0267859	RNF43, ZNRF3	262	2	19357	73.8817	1	1	0.994179
GOTERM_BP_DIRECT	GO:0034331~cell junction maintenance	2	0.70922	0.0267859	CLDN3, CLDN1	262	2	19357	73.8817	1	1	0.994179
GOTERM_BP_DIRECT	GO:0031145~anaphase-promoting complex-dependent catabolic process	4	1.41844	0.0268462	CDC20, UBE2C, UBE2S, PSMA7	262	48	19357	6.15681	1	1	0.994179
GOTERM_BP_DIRECT	GO:0006629~lipid metabolic process	8	2.83688	0.0277544	FABP6, HNF4A, CPNE1, DPEP1, PLAGL2, CEL, LRP8, HRSP12	262	216	19357	2.73636	1	1	0.994179
GOTERM_BP_DIRECT	GO:0051726~regulation of cell cycle	9	3.19149	0.0289416	BOP1, MRGBP, FIGNL1, XIAP, TXLNG, JADE3, BRCA1, FOXM1, E2F5	262	267	19357	2.49039	1	1	0.994179
GOTERM_BP_DIRECT	GO:0006468~protein phosphorylation	13	4.60993	0.0338757	GUCY2C, TP53RK, PRKDC, HUNK, CASK, AURKB, AURKA, CCNB1, CHEK1, TRIB3, NEK3, TAF4, BUB1	262	489	19357	1.96413	1	1	0.994179
GOTERM_BP_DIRECT	GO:0006974~cellular response to DNA damage stimulus	9	3.19149	0.0340809	VAV3, MCM7, MCM8, PRKDC, MYC, WDR4, CHEK1, XIAP, BRCA1	262	276	19357	2.40919	1	1	0.994179
GOTERM_BP_DIRECT	GO:0006364~rRNA processing	6	2.12766	0.0343158	NOP56, BOP1, DKC1, CHD7, EXOSC3, UTP14A	262	133	19357	3.33301	1	1	0.994179
GOTERM_BP_DIRECT	GO:0006268~DNA unwinding involved in DNA replication	3	1.06383	0.0350392	GINS1, GINS2, MCM7	262	22	19357	10.0748	1	1	0.994179
GOTERM_BP_DIRECT	GO:0045944~positive regulation of transcription from RNA polymerase II promoter	25	8.86525	0.0355009	NUFIP1, PRKDC, SATB2, CHD7, NR1I2, BRCA1, FOXM1, ASCL2, MED14, MYC, HNF4A, MYB, PLAGL2, MYBL2, TEAD4, AKIRIN2, ATAD2, CASK, ARID3A, PROX1, ETV4, TOX3, GAL, PRPF6, FOXA2	262	1204	19357	1.53409	1	1	0.994179
GOTERM_BP_DIRECT	GO:0006338~chromatin remodeling	7	2.48227	0.0357677	ERCC6L, MYC, SATB2, CHD7, MYB, PABPC1L, RAD54B	262	180	19357	2.87318	1	1	0.994179
GOTERM_BP_DIRECT	GO:0035019~somatic stem cell population maintenance	4	1.41844	0.0363173	MED14, MED30, NKAP, ASCL2	262	54	19357	5.47272	1	1	0.994179
GOTERM_BP_DIRECT	GO:0007088~regulation of mitotic nuclear division	3	1.06383	0.0380415	BORA, MKI67, CDC25C	262	23	19357	9.63674	1	1	0.994179
GOTERM_BP_DIRECT	GO:0042908~xenobiotic transport	3	1.06383	0.0380415	SLC22A3, SLC7A5, NR1I2	262	23	19357	9.63674	1	1	0.994179
GOTERM_BP_DIRECT	GO:0019827~stem cell population maintenance	4	1.41844	0.0398072	MED14, MED30, NKAP, PHF19	262	56	19357	5.27726	1	1	0.994179
GOTERM_BP_DIRECT	GO:0044772~mitotic cell cycle phase transition	3	1.06383	0.0411382	CCNA2, CCNB2, CCNB1	262	24	19357	9.23521	1	1	0.994179
GOTERM_BP_DIRECT	GO:0007020~microtubule nucleation	3	1.06383	0.0411382	TPX2, CENPJ, TUBGCP3	262	24	19357	9.23521	1	1	0.994179
GOTERM_BP_DIRECT	GO:0006366~transcription from RNA polymerase II promoter	8	2.83688	0.0442129	MYC, HNF4A, CHD7, NFE2L3, TRIP13, PROX1, TAF4, TCFL5	262	239	19357	2.47303	1	1	0.994179
GOTERM_BP_DIRECT	GO:0032508~DNA duplex unwinding	4	1.41844	0.0453483	RFC3, MCM8, DSCC1, RAD54B	262	59	19357	5.00893	1	1	0.994179
GOTERM_BP_DIRECT	GO:0040008~regulation of growth	4	1.41844	0.0492433	ENOX2, CCNB2, MRGBP, ARMC10	262	61	19357	4.8447	1	1	0.994179
GOTERM_BP_DIRECT	GO:0016055~Wnt signaling pathway	7	2.48227	0.0494056	MIR224, RNF43, ZNRF3, LRP4, XIAP, AXIN2, APCDD1	262	195	19357	2.65216	1	1	0.994179
GOTERM_BP_DIRECT	GO:0051454~intracellular pH elevation	2	0.70922	0.0528569	CFTR, NOX1	262	4	19357	36.9408	1	1	0.994179
GOTERM_BP_DIRECT	GO:1905111~positive regulation of pulmonary blood vessel remodeling	2	0.70922	0.0528569	MIR20A, MIR17	262	4	19357	36.9408	1	1	0.994179
GOTERM_BP_DIRECT	GO:0002943~tRNA dihydrouridine synthesis	2	0.70922	0.0528569	DUS4L, DUS3L	262	4	19357	36.9408	1	1	0.994179
GOTERM_BP_DIRECT	GO:0007057~spindle assembly involved in female meiosis I	2	0.70922	0.0528569	CCNB2, AURKA	262	4	19357	36.9408	1	1	0.994179
GOTERM_BP_DIRECT	GO:0010332~response to gamma radiation	3	1.06383	0.0544088	PRKDC, MYC, BRCA2	262	28	19357	7.91589	1	1	0.994179
GOTERM_BP_DIRECT	GO:0006270~DNA replication initiation	3	1.06383	0.0544088	POLA1, MCM7, CDC6	262	28	19357	7.91589	1	1	0.994179
GOTERM_BP_DIRECT	GO:2001243~negative regulation of intrinsic apoptotic signaling pathway	3	1.06383	0.0544088	HELLS, MIR17, FIGNL1	262	28	19357	7.91589	1	1	0.994179
GOTERM_BP_DIRECT	GO:0042752~regulation of circadian rhythm	4	1.41844	0.0553811	PRKDC, HNF4A, PROX1, EZH2	262	64	19357	4.6176	1	1	0.994179
GOTERM_BP_DIRECT	GO:0045471~response to ethanol	5	1.77305	0.0569007	SPINK1, CLDN3, MYC, ABAT, CLDN1	262	107	19357	3.45241	1	1	0.994179
GOTERM_BP_DIRECT	GO:0071466~cellular response to xenobiotic stimulus	4	1.41844	0.0618652	DDC, MCM7, MYC, DPEP1	262	67	19357	4.41085	1	1	0.994179
GOTERM_BP_DIRECT	GO:0043009~chordate embryonic development	2	0.70922	0.0656304	CHD7, BRCA1	262	5	19357	29.5527	1	1	0.994179
GOTERM_BP_DIRECT	GO:1903934~positive regulation of DNA primase activity	2	0.70922	0.0656304	GINS1, GINS2	262	5	19357	29.5527	1	1	0.994179
GOTERM_BP_DIRECT	GO:0051754~meiotic sister chromatid cohesion, centromeric	2	0.70922	0.0656304	BUB1B, BUB1	262	5	19357	29.5527	1	1	0.994179
GOTERM_BP_DIRECT	GO:0010667~negative regulation of cardiac muscle cell apoptotic process	3	1.06383	0.0727718	MIR19B1, MIR20A, MIR19A	262	33	19357	6.71652	1	1	0.994179
GOTERM_BP_DIRECT	GO:0007131~reciprocal meiotic recombination	3	1.06383	0.0727718	MND1, TRIP13, RAD54B	262	33	19357	6.71652	1	1	0.994179
GOTERM_BP_DIRECT	GO:1902036~regulation of hematopoietic stem cell differentiation	3	1.06383	0.0766542	PRKDC, PUS7, PSMA7	262	34	19357	6.51897	1	1	0.994179
GOTERM_BP_DIRECT	GO:0051973~positive regulation of telomerase activity	3	1.06383	0.0766542	DKC1, MYC, AURKB	262	34	19357	6.51897	1	1	0.994179
GOTERM_BP_DIRECT	GO:0051383~kinetochore organization	2	0.70922	0.0782322	CENPH, NUF2	262	6	19357	24.6272	1	1	0.994179
GOTERM_BP_DIRECT	GO:0015827~tryptophan transport	2	0.70922	0.0782322	ACE2, SLC7A5	262	6	19357	24.6272	1	1	0.994179
GOTERM_BP_DIRECT	GO:0003081~regulation of systemic arterial blood pressure by renin-angiotensin	2	0.70922	0.0782322	ACE2, NOX1	262	6	19357	24.6272	1	1	0.994179
GOTERM_BP_DIRECT	GO:0000132~establishment of mitotic spindle orientation	3	1.06383	0.0806006	GPSM2, CENPA, MAD2L1	262	35	19357	6.33272	1	1	0.994179
GOTERM_BP_DIRECT	GO:0006325~chromatin organization	8	2.83688	0.0820203	MRGBP, CARM1, CHD7, ATAD2, BRCC3, EZH2, FOXA2, PHF19	262	277	19357	2.13377	1	1	0.994179
GOTERM_BP_DIRECT	GO:0051865~protein autoubiquitination	4	1.41844	0.0832895	RNF157, BRCA1, BRCC3, BRCA2	262	76	19357	3.88851	1	1	0.994179
GOTERM_BP_DIRECT	GO:0007095~mitotic G2 DNA damage checkpoint	3	1.06383	0.0846086	CHEK1, BRCA1, BRCC3	262	36	19357	6.15681	1	1	0.994179
GOTERM_BP_DIRECT	GO:0045787~positive regulation of cell cycle	3	1.06383	0.0886759	MYC, CHEK1, PROX1	262	37	19357	5.99041	1	1	0.994179
GOTERM_BP_DIRECT	GO:0060173~limb development	3	1.06383	0.0886759	ZNRF3, CHD7, LRP4	262	37	19357	5.99041	1	1	0.994179
GOTERM_BP_DIRECT	GO:1905460~negative regulation of vascular associated smooth muscle cell apoptotic process	2	0.70922	0.0906647	SLC7A5, MIR17	262	7	19357	21.1091	1	1	0.994179
GOTERM_BP_DIRECT	GO:0051574~positive regulation of histone H3-K9 methylation	2	0.70922	0.0906647	MYB, BRCA1	262	7	19357	21.1091	1	1	0.994179
GOTERM_BP_DIRECT	GO:0071459~protein localization to chromosome, centromeric region	2	0.70922	0.0906647	BUB1B, CENPA	262	7	19357	21.1091	1	1	0.994179
GOTERM_BP_DIRECT	GO:1903348~positive regulation of bicellular tight junction assembly	2	0.70922	0.0906647	CLDN3, CLDN1	262	7	19357	21.1091	1	1	0.994179
GOTERM_BP_DIRECT	GO:0006564~L-serine biosynthetic process	2	0.70922	0.0906647	PSAT1, PSPH	262	7	19357	21.1091	1	1	0.994179
GOTERM_BP_DIRECT	GO:1904465~negative regulation of matrix metallopeptidase secretion	2	0.70922	0.0906647	MIR19B1, MIR19A	262	7	19357	21.1091	1	1	0.994179
GOTERM_BP_DIRECT	GO:1904685~positive regulation of metalloendopeptidase activity	2	0.70922	0.0906647	MIR92A1, MIR17	262	7	19357	21.1091	1	1	0.994179
GOTERM_BP_DIRECT	GO:0010994~free ubiquitin chain polymerization	2	0.70922	0.0906647	UBE2C, UBE2S	262	7	19357	21.1091	1	1	0.994179
GOTERM_BP_DIRECT	GO:0048813~dendrite morphogenesis	3	1.06383	0.0928001	FARP1, LRP4, LRP8	262	38	19357	5.83276	1	1	0.994179
GOTERM_BP_DIRECT	GO:0010212~response to ionizing radiation	3	1.06383	0.0928001	BRCA1, BRCC3, RAD54B	262	38	19357	5.83276	1	1	0.994179
GOTERM_BP_DIRECT	GO:0043066~negative regulation of apoptotic process	12	4.25532	0.0950946	RNF157, ARMC10, PRKDC, MYC, FIGNL1, DPEP1, ASNS, XIAP, MIR19A, TDGF1, MAD2L1, AURKA	262	520	19357	1.70496	1	1	0.994179
GOTERM_BP_DIRECT	GO:0045892~negative regulation of transcription, DNA-templated	13	4.60993	0.0987959	NR1I2, NKAP, BRCA1, PROX1, FOXM1, EREG, DACH1, SCML1, HNF4A, MYB, TRIB3, NELFCD, EZH2	262	585	19357	1.64182	1	1	0.994179
GOTERM_BP_DIRECT	GO:0030593~neutrophil chemotaxis	4	1.41844	0.0990983	VAV3, CCL15-CCL14, CXADR, DPEP1, CCL15	262	82	19357	3.60398	1	1	0.994179

## Sheet: DOWN_BP
Supplementary table 1d: Downregulated biological processes associated with DKC1 high patients from combined patient data microarray analysis.
Category	Term	Count	%	PValue	Genes	List Total	Pop Hits	Pop Total	Fold Enrichment	Bonferroni	Benjamini	FDR
GOTERM_BP_DIRECT	GO:0070374~positive regulation of ERK1 and ERK2 cascade	5	10	0.0013059	PTPRC, PLA2G2A, IGF1, EGFR, FGFR2	42	226	19357	10.1965	0.532581	0.569688	0.569688
GOTERM_BP_DIRECT	GO:0008210~estrogen metabolic process	3	6	0.00195769	UGT2B15, UGT2B17, CYP1B1	42	31	19357	44.6014	0.680339	0.569688	0.569688
GOTERM_BP_DIRECT	GO:0018108~peptidyl-tyrosine phosphorylation	4	8	0.00316398	EPHA4, PTPRC, EGFR, FGFR2	42	139	19357	13.2628	0.841873	0.613811	0.613811
GOTERM_BP_DIRECT	GO:0008202~steroid metabolic process	3	6	0.00563331	UGT2B15, UGT2B17, CYP1B1	42	53	19357	26.0876	0.962666	0.745522	0.745522
GOTERM_BP_DIRECT	GO:0046777~protein autophosphorylation	4	8	0.00640483	EPHA4, PTPRC, EGFR, FGFR2	42	179	19357	10.299	0.976236	0.745522	0.745522
GOTERM_BP_DIRECT	GO:0033674~positive regulation of kinase activity	3	6	0.00991779	EPHA4, EGFR, FGFR2	42	71	19357	19.4738	0.996975	0.869725	0.869725
GOTERM_BP_DIRECT	GO:0050679~positive regulation of epithelial cell proliferation	3	6	0.0104606	IGF1, EGFR, FGFR2	42	73	19357	18.9403	0.997802	0.869725	0.869725
GOTERM_BP_DIRECT	GO:0030335~positive regulation of cell migration	4	8	0.0178969	EPHA4, CXCL12, IGF1, EGFR	42	262	19357	7.03635	0.999973	1	1
GOTERM_BP_DIRECT	GO:0006805~xenobiotic metabolic process	3	6	0.0231045	UGT2B15, UGT2B17, CYP1B1	42	111	19357	12.4562	0.999999	1	1
GOTERM_BP_DIRECT	GO:0008284~positive regulation of cell proliferation	5	10	0.0270278	EPHA4, SFRP2, IGF1, EGFR, FGFR2	42	541	19357	4.25953	1	1	1
GOTERM_BP_DIRECT	GO:0048546~digestive tract morphogenesis	2	4	0.0292582	SFRP2, EGFR	42	14	19357	65.8401	1	1	1
GOTERM_BP_DIRECT	GO:0030277~maintenance of gastrointestinal epithelium	2	4	0.0313158	MUC2, MUC4	42	15	19357	61.4508	1	1	1
GOTERM_BP_DIRECT	GO:1902230~negative regulation of intrinsic apoptotic signaling pathway in response to DNA damage	2	4	0.0313158	CXCL12, SFRP2	42	15	19357	61.4508	1	1	1
GOTERM_BP_DIRECT	GO:0090263~positive regulation of canonical Wnt signaling pathway	3	6	0.0322678	SFRP2, EGFR, FGFR2	42	133	19357	10.3958	1	1	1
GOTERM_BP_DIRECT	GO:0007169~transmembrane receptor protein tyrosine kinase signaling pathway	3	6	0.0322678	EPHA4, EGFR, FGFR2	42	133	19357	10.3958	1	1	1
GOTERM_BP_DIRECT	GO:0010273~detoxification of copper ion	2	4	0.0354183	MUC2, MT1M	42	17	19357	54.2213	1	1	1
GOTERM_BP_DIRECT	GO:0031668~cellular response to extracellular stimulus	2	4	0.0395038	SFRP2, PTPRC	42	19	19357	48.5138	1	1	1
GOTERM_BP_DIRECT	GO:0008589~regulation of smoothened signaling pathway	2	4	0.0415403	GAS1, FGFR2	42	20	19357	46.0881	1	1	1
GOTERM_BP_DIRECT	GO:0052695~cellular glucuronidation	2	4	0.0415403	UGT2B15, UGT2B17	42	20	19357	46.0881	1	1	1
GOTERM_BP_DIRECT	GO:0014911~positive regulation of smooth muscle cell migration	2	4	0.0456005	CYP1B1, IGF1	42	22	19357	41.8983	1	1	1
GOTERM_BP_DIRECT	GO:0043410~positive regulation of MAPK cascade	3	6	0.0461408	PTPRC, IGF1, FGFR2	42	162	19357	8.53483	1	1	1
GOTERM_BP_DIRECT	GO:0045821~positive regulation of glycolytic process	2	4	0.0476243	IGF1, SLC4A4	42	23	19357	40.0766	1	1	1
GOTERM_BP_DIRECT	GO:0070372~regulation of ERK1 and ERK2 cascade	2	4	0.0576807	EGFR, FGFR2	42	28	19357	32.9201	1	1	1
GOTERM_BP_DIRECT	GO:0030336~negative regulation of cell migration	3	6	0.0584276	EPHA4, SFRP2, CYP1B1	42	185	19357	7.47375	1	1	1
GOTERM_BP_DIRECT	GO:1902430~negative regulation of beta-amyloid formation	2	4	0.0596795	SPON1, IGF1	42	29	19357	31.7849	1	1	1
GOTERM_BP_DIRECT	GO:0051453~regulation of intracellular pH	2	4	0.0596795	CA2, SLC4A4	42	29	19357	31.7849	1	1	1
GOTERM_BP_DIRECT	GO:0060349~bone morphogenesis	2	4	0.0616742	SFRP2, FGFR2	42	30	19357	30.7254	1	1	1
GOTERM_BP_DIRECT	GO:0090102~cochlea development	2	4	0.0636647	EPHA4, SLITRK6	42	31	19357	29.7343	1	1	1
GOTERM_BP_DIRECT	GO:0071276~cellular response to cadmium ion	2	4	0.0755218	MT1M, EGFR	42	37	19357	24.9125	1	1	1
GOTERM_BP_DIRECT	GO:0046326~positive regulation of glucose import	2	4	0.0755218	ITLN1, IGF1	42	37	19357	24.9125	1	1	1
GOTERM_BP_DIRECT	GO:0010719~negative regulation of epithelial to mesenchymal transition	2	4	0.0813953	EPHA4, SFRP2	42	40	19357	23.044	1	1	1
GOTERM_BP_DIRECT	GO:0009408~response to heat	2	4	0.0930332	CXCL12, IGF1	42	46	19357	20.0383	1	1	1
GOTERM_BP_DIRECT	GO:1904646~cellular response to beta-amyloid	2	4	0.0930332	EPHA4, IGF1	42	46	19357	20.0383	1	1	1
GOTERM_BP_DIRECT	GO:0001837~epithelial to mesenchymal transition	2	4	0.0987981	IGF1, FGFR2	42	49	19357	18.8115	1	1	1
