# Supplementary material for: Canonical WNT signaling-driven DKC1 dysregulates sphingolipid biosynthesis and drives colorectal cancer.
Source: Research Square preprint supplement (doi:10.21203/rs.3.rs-3180701/v1), 2023-12-04
Supplement: Supplementary file 5 [file 8fc02795ec85e63e22b09266.xlsx]

## Sheet: UP
Supplementary table 2a: Upregulated genes obtained after differential expression profile analysis of RNAseq for shDKC1 and shSCRM SW620 cells.
NCBI IDs	baseMean	log2FoldChange	lfcSE	stat	pvalue	padj	gene_symbol
100533467	137.292	22.7931	4.20633	5.41876	6e-08	7.96e-06	BIVM-ERCC5
283212	24.0951	7.57031	1.7644	4.2906	1.78e-05	0.0010348	KLHL35
2042	21.5006	7.40861	2.41322	3.07001	0.0021405	0.0444748	EPHA3
344148	15.2655	6.91154	1.80015	3.83942	0.000123326	0.0048176	NCKAP5
486	9.69368	6.25692	1.63271	3.83224	0.000126981	0.00493297	FXYD2
866	7.70548	5.92974	1.82124	3.25587	0.00113044	0.0282027	SERPINA6
90249	6.84972	5.75428	1.86882	3.0791	0.0020763	0.0437111	UNC5A
286207	6.26696	5.63231	1.7605	3.19927	0.00137778	0.0327292	CFAP157
152831	13.9634	4.30326	1.29103	3.33321	0.00085849	0.0229088	KLB
2555	79.3126	4.22653	0.805141	5.24943	1.53e-07	1.74e-05	GABRA2
2040	58.4639	2.53553	0.645455	3.92829	8.56e-05	0.00360218	STOM
3484	385.695	2.17758	0.484595	4.49361	7e-06	0.000473456	IGFBP1
85293	32.2764	2.0689	0.598767	3.45527	0.000549745	0.0160064	KRTAP3-3
58510	49.8434	1.95754	0.494248	3.96066	7.47e-05	0.00319493	PRODH2
257629	28.4502	1.9446	0.552244	3.52128	0.000429473	0.0133032	ANKS4B
7851	498.744	1.90644	0.537062	3.54975	0.000385591	0.0122683	MALL
1124	320.512	1.71542	0.187789	9.13482	6.55e-20	1.15e-16	CHN2
55504	264.483	1.70718	0.204415	8.35154	6.74e-17	6.77e-14	TNFRSF19
5919	228.27	1.65235	0.241572	6.83999	7.92e-12	2.77e-09	RARRES2
11259	1036.74	1.62404	0.298944	5.4326	5.55e-08	7.44e-06	FILIP1L
57091	79.9961	1.62117	0.333452	4.86178	1.16e-06	9.92e-05	CASS4
146227	196.877	1.62015	0.505889	3.20258	0.00136205	0.0325203	BEAN1
10077	125.461	1.61896	0.376726	4.29744	1.73e-05	0.00101242	TSPAN32
140685	173.482	1.58438	0.343437	4.61332	3.96e-06	0.000291965	ZBTB46
84662	128.699	1.5348	0.416591	3.68419	0.000229428	0.00796652	GLIS2
10110	44.2543	1.52617	0.494113	3.08871	0.0020103	0.0428346	SGK2
4919	235.027	1.5102	0.192199	7.85748	3.92e-15	2.76e-12	ROR1
84206	70.5627	1.46143	0.432253	3.38095	0.000722362	0.0200537	MEX3B
64799	275.367	1.42569	0.434669	3.27995	0.00103827	0.0267912	IQCH
5265	747.444	1.38689	0.231798	5.98319	2.19e-09	4.4e-07	SERPINA1
23034	245.064	1.36075	0.422236	3.22273	0.00126974	0.0307869	SAMD4A
3212	205.823	1.34155	0.41184	3.25745	0.00112418	0.0282027	HOXB2
1134	408.433	1.34152	0.164243	8.16789	3.14e-16	2.6e-13	CHRNA1
7042	89.665	1.33875	0.314943	4.25077	2.13e-05	0.00116573	TGFB2
3576	587.503	1.31552	0.397593	3.3087	0.000937299	0.024684	CXCL8
1850	205.416	1.31317	0.231041	5.6837	1.32e-08	2.16e-06	DUSP8
9590	29273.7	1.2729	0.314376	4.04897	5.14e-05	0.00234122	AKAP12
9411	1995.91	1.26099	0.248097	5.08264	3.72e-07	3.64e-05	ARHGAP29
80114	575.054	1.26013	0.210948	5.97364	2.32e-09	4.6e-07	BICC1
64132	98.549	1.22213	0.37559	3.25389	0.00113835	0.0282839	XYLT2
2921	295.764	1.19624	0.261946	4.56673	4.95e-06	0.000351859	CXCL3
3037	804.845	1.18494	0.3116	3.80277	0.000143088	0.00543851	HAS2
5174	100.901	1.18127	0.349587	3.37904	0.0007274	0.0200784	PDZK1
54997	1152.27	1.17763	0.14129	8.33485	7.76e-17	7.27e-14	TESC
1316	4063.59	1.16928	0.31495	3.71259	0.000205148	0.00724872	KLF6
10669	231.813	1.1628	0.244019	4.76521	1.89e-06	0.000152478	CGREF1
126017	65.0653	1.16259	0.355814	3.26741	0.00108536	0.0276511	ZNF813
3491	225.476	1.14859	0.365913	3.13898	0.00169539	0.0377848	CCN1
56731	819.261	1.14648	0.215355	5.32371	1.02e-07	1.29e-05	SLC2A4RG
23464	92.1957	1.12306	0.332307	3.37959	0.000725932	0.0200784	GCAT
2295	353.872	1.08673	0.239652	4.53459	5.77e-06	0.000403804	FOXF2
730755	79.9706	1.07676	0.305193	3.52814	0.000418495	0.0130206	KRTAP2-3
55902	447.471	1.0675	0.345823	3.08685	0.0020229	0.0429891	ACSS2
53826	656.348	1.03322	0.127672	8.09276	5.83e-16	4.56e-13	FXYD6
81788	144.469	1.03268	0.254676	4.05489	5.02e-05	0.00230328	NUAK2
1902	95.9291	1.02419	0.262571	3.90065	9.59e-05	0.00392197	LPAR1
57552	2043.09	1.02279	0.154223	6.63189	3.31e-11	9.86e-09	NCEH1
79990	118.358	1.02002	0.302373	3.3734	0.000742461	0.020393	PLEKHH3
10139	266.96	1.01817	0.241728	4.21202	2.53e-05	0.00133808	ARFRP1
23414	113.676	1.01378	0.281543	3.60082	0.000317213	0.0104718	ZFPM2
1960	898.306	0.980917	0.298689	3.28408	0.00102317	0.0264653	EGR3
9586	429.87	0.980821	0.231217	4.24199	2.22e-05	0.00119833	CREB5
79144	1627.93	0.970476	0.276133	3.51452	0.000440546	0.0135864	PPDPF
51604	2004.19	0.969568	0.0952641	10.1777	2.49e-24	8.77e-21	PIGT
7791	4117.79	0.964312	0.157573	6.11979	9.37e-10	2.09e-07	ZYX
1020	302.367	0.961728	0.183292	5.24697	1.55e-07	1.75e-05	CDK5
4708	1315.26	0.952542	0.161213	5.90861	3.45e-09	6.65e-07	NDUFB2
5799	2621.49	0.929786	0.291284	3.19202	0.00141281	0.0332104	PTPRN2
652	3309.45	0.920048	0.167362	5.49735	3.86e-08	5.48e-06	BMP4
3897	3869.68	0.915817	0.293383	3.12157	0.00179887	0.0392362	L1CAM
8835	252.439	0.911878	0.225511	4.04361	5.26e-05	0.00238006	SOCS2
3725	6176.56	0.911765	0.177776	5.12873	2.92e-07	2.97e-05	JUN
7025	409.57	0.906809	0.21043	4.30932	1.64e-05	0.000967599	NR2F1
54923	494.058	0.90153	0.28313	3.18416	0.00145175	0.0336897	LIME1
10221	2479.89	0.894127	0.263946	3.38754	0.000705221	0.0196776	TRIB1
373156	2133.14	0.88275	0.166617	5.29809	1.17e-07	1.46e-05	GSTK1
79006	87.8348	0.880436	0.286665	3.07131	0.00213121	0.0444545	METRN
56937	3689.06	0.875541	0.243043	3.60241	0.000315282	0.0104571	PMEPA1
83590	1747.06	0.873866	0.210852	4.14445	3.41e-05	0.00170475	TMUB1
1843	444.833	0.870403	0.282366	3.08254	0.00205244	0.0433386	DUSP1
5688	5249.67	0.864301	0.0966401	8.9435	3.77e-19	5.3e-16	PSMA7
1647	8432.91	0.861178	0.279005	3.08661	0.00202454	0.0429891	GADD45A
3028	2753.51	0.860915	0.0916854	9.38988	6.01e-21	1.21e-17	HSD17B10
9747	2194.61	0.86011	0.129145	6.66003	2.74e-11	8.56e-09	TCAF1
9472	239.255	0.856467	0.183319	4.672	2.98e-06	0.000233042	AKAP6
79641	208.784	0.853839	0.254466	3.35541	0.000792465	0.0215977	ROGDI
201134	311.707	0.846453	0.207863	4.07217	4.66e-05	0.00218313	CEP112
439921	1133.34	0.846126	0.2768	3.05682	0.00223702	0.0460602	MXRA7
2584	230.495	0.84387	0.268234	3.14602	0.00165506	0.0371392	GALK1
11211	553.714	0.831054	0.144663	5.74476	9.21e-09	1.58e-06	FZD10
4915	941.437	0.829763	0.223375	3.71467	0.000203472	0.00720763	NTRK2
7832	418.76	0.827116	0.141043	5.8643	4.51e-09	8.35e-07	BTG2
5476	1524.42	0.826893	0.109561	7.54736	4.44e-14	2.31e-11	CTSA
10005	413.788	0.825433	0.175999	4.68998	2.73e-06	0.000214667	ACOT8
2051	1489.61	0.824201	0.186865	4.41067	1.03e-05	0.000658745	EPHB6
6009	3607.77	0.822049	0.26279	3.12815	0.00175908	0.0387721	RHEB
7988	630.808	0.817288	0.210795	3.87717	0.000105677	0.00422198	ZNF212
64764	3389.6	0.807043	0.215338	3.7478	0.000178392	0.00660191	CREB3L2
6091	6184.54	0.795232	0.212061	3.75002	0.000176821	0.00656106	ROBO1
285971	571.417	0.792335	0.211041	3.7544	0.000173754	0.00648143	ZNF775
8091	1070.42	0.782239	0.168549	4.64103	3.47e-06	0.000260709	HMGA2
6581	733.898	0.778005	0.240481	3.2352	0.00121558	0.0297818	SLC22A3
4835	231.74	0.777937	0.244751	3.17849	0.00148047	0.0341109	NQO2
92092	591.049	0.774382	0.185898	4.16562	3.11e-05	0.00157466	ZC3HAV1L
8805	1699.68	0.768773	0.106575	7.21345	5.46e-13	2.19e-10	TRIM24
3213	2231.53	0.767788	0.148608	5.16652	2.38e-07	2.54e-05	HOXB3
55049	336.688	0.763291	0.182984	4.17135	3.03e-05	0.00155409	REX1BD
55905	3856.19	0.762062	0.145678	5.23114	1.68e-07	1.9e-05	RNF114
56180	2567.48	0.761995	0.181959	4.18772	2.82e-05	0.00147307	MOSPD1
339665	608.344	0.759136	0.204207	3.71749	0.000201211	0.00718182	SLC35E4
10538	329.117	0.754649	0.194558	3.8788	0.000104975	0.00420588	BATF
140885	325.152	0.749529	0.161011	4.65514	3.24e-06	0.000246108	SIRPA
55251	3899.39	0.748792	0.150346	4.98046	6.34e-07	5.83e-05	PCMTD2
5307	2235.51	0.746103	0.125896	5.92635	3.1e-09	6.05e-07	PITX1
57169	1574.47	0.745289	0.236467	3.15176	0.00162288	0.0366921	ZNFX1
55861	1447.03	0.742992	0.153897	4.82784	1.38e-06	0.000116929	DBNDD2
6591	839.725	0.738619	0.155593	4.74711	2.06e-06	0.000163947	SNAI2
647087	1092.31	0.73523	0.153984	4.77472	1.8e-06	0.000146285	STMP1
6742	3441.3	0.728232	0.115608	6.29916	2.99e-10	7.26e-08	SSBP1
10486	215.734	0.726845	0.194694	3.73327	0.000189007	0.00688604	CAP2
11135	4481.35	0.72273	0.196965	3.66934	0.000243178	0.00832071	CDC42EP1
83658	2547.12	0.719144	0.136756	5.25858	1.45e-07	1.69e-05	DYNLRB1
79989	621.47	0.717422	0.166238	4.31562	1.59e-05	0.00094438	TTC26
5176	3026.11	0.715507	0.124188	5.76149	8.34e-09	1.45e-06	SERPINF1
2778	16038.8	0.714712	0.0984043	7.26302	3.79e-13	1.57e-10	GNAS
286343	893.896	0.70835	0.120731	5.86718	4.43e-09	8.31e-07	LURAP1L
284184	282.092	0.704231	0.194826	3.61466	0.000300739	0.0100698	NDUFAF8
6595	1039.28	0.702996	0.179405	3.91847	8.91e-05	0.00372692	SMARCA2
64856	416.565	0.702158	0.166467	4.21801	2.46e-05	0.00131294	VWA1
116151	541.367	0.700433	0.15096	4.63986	3.49e-06	0.000260799	FAM210B
91768	662.991	0.69989	0.223514	3.1313	0.00174032	0.038542	CABLES1
11054	1692.43	0.697775	0.147106	4.74333	2.1e-06	0.000166096	OGFR
23127	3319.44	0.69329	0.129938	5.33553	9.53e-08	1.22e-05	COLGALT2
80853	2183.97	0.692646	0.125048	5.53906	3.04e-08	4.5e-06	KDM7A
9690	5859.06	0.687791	0.161127	4.26862	1.97e-05	0.00109763	UBE3C
11194	302.803	0.682663	0.186345	3.66343	0.000248861	0.00847392	ABCB8
10980	2041.7	0.682485	0.129652	5.26396	1.41e-07	1.67e-05	COPS6
6789	3115.85	0.681278	0.130956	5.20234	1.97e-07	2.2e-05	STK4
57406	365.941	0.679511	0.166283	4.08647	4.38e-05	0.00209507	ABHD6
10371	4687.19	0.674853	0.130877	5.15638	2.52e-07	2.66e-05	SEMA3A
514	4276.98	0.672174	0.125007	5.3771	7.57e-08	9.86e-06	ATP5F1E
29803	8915.99	0.670189	0.177538	3.7749	0.000160073	0.00606768	REPIN1
8536	295.617	0.669835	0.184552	3.62952	0.000283952	0.00955315	CAMK1
51497	4297.09	0.66954	0.106014	6.31561	2.69e-10	6.76e-08	NELFCD
1073	196.915	0.66788	0.213964	3.12146	0.00179957	0.0392362	CFL2
54901	4630.76	0.666866	0.118368	5.63385	1.76e-08	2.69e-06	CDKAL1
10061	4468.03	0.666087	0.135873	4.90226	9.47e-07	8.22e-05	ABCF2
6576	591.043	0.665571	0.13831	4.81216	1.49e-06	0.000124243	SLC25A1
58508	2842.18	0.665443	0.208494	3.19166	0.00141456	0.0332104	KMT2C
3315	2624.83	0.663698	0.0974697	6.80927	9.81e-12	3.21e-09	HSPB1
4521	319.041	0.662057	0.163183	4.05713	4.97e-05	0.0022906	NUDT1
8480	2242.23	0.658734	0.0993619	6.62964	3.37e-11	9.86e-09	RAE1
10049	3063.49	0.65821	0.109307	6.02166	1.73e-09	3.68e-07	DNAJB6
80331	2621.65	0.657862	0.120966	5.43842	5.38e-08	7.34e-06	DNAJC5
51507	2808.61	0.654658	0.0988252	6.6244	3.49e-11	1e-08	RTF2
435	318.592	0.651552	0.167977	3.87882	0.000104966	0.00420588	ASL
6227	12391.9	0.647402	0.164249	3.94158	8.09e-05	0.00341846	RPS21
9217	3042.63	0.645179	0.12593	5.12332	3e-07	3.04e-05	VAPB
11102	380.467	0.639693	0.181122	3.53183	0.000412693	0.0128971	RPP14
145567	383.715	0.634465	0.194795	3.2571	0.00112558	0.0282027	TTC7B
516	896.002	0.633275	0.122241	5.18052	2.21e-07	2.39e-05	ATP5MC1
64327	2209.47	0.627634	0.146307	4.28983	1.79e-05	0.0010348	LMBR1
136051	352.582	0.622936	0.192609	3.23419	0.00121988	0.0297832	ZNF786
84326	376.771	0.617454	0.193537	3.19037	0.00142092	0.0333041	METTL26
283078	388.382	0.616894	0.144979	4.25506	2.09e-05	0.00115005	MKX
3726	1186.08	0.615074	0.148827	4.13282	3.58e-05	0.00176676	JUNB
26205	1320.22	0.612962	0.09528	6.43327	1.25e-10	3.31e-08	GMEB2
254048	1456.7	0.612638	0.134715	4.54767	5.42e-06	0.000381415	UBN2
2296	393.196	0.609926	0.142392	4.28344	1.84e-05	0.00104776	FOXC1
27153	1257.94	0.607971	0.120301	5.05374	4.33e-07	4.17e-05	ZNF777
113452	282.902	0.607603	0.178535	3.40328	0.000665824	0.0187429	TMEM54
57541	806.522	0.60409	0.156093	3.87006	0.000108807	0.00432248	ZNF398
149986	1459.54	0.601541	0.147658	4.07389	4.62e-05	0.00217456	LSM14B
3092	1788.82	0.600711	0.140964	4.26146	2.03e-05	0.00112676	HIP1

## Sheet: DOWN
Supplementary table 2b: Downregulated genes obtained after differential expression profile analysis of RNAseq for shDKC1 and shSCRM SW620 cells.
NCBI IDs	baseMean	log2FoldChange	lfcSE	stat	pvalue	padj	gene_symbol
161291	15.6604	-8.02522	1.3892	-5.77685	7.61e-09	1.35e-06	TMEM30B
146439	13.4209	-7.8026	1.47122	-5.30348	1.14e-07	1.43e-05	BICDL2
11254	9.98141	-7.37542	1.58816	-4.64399	3.42e-06	0.000258385	SLC6A14
53840	7.22891	-6.90994	1.85968	-3.71565	0.000202678	0.00719763	TRIM34
286676	5.67976	-6.56199	2.00723	-3.26917	0.00107864	0.0276152	ILDR1
1474	5.33398	-6.47138	2.00692	-3.22454	0.00126176	0.0306462	CST6
9312	5.33382	-6.47134	2.02141	-3.20139	0.00136765	0.032582	KCNB2
5413	10.9224	-5.0533	1.57724	-3.20389	0.00135582	0.0324268	SEPTIN5
65061	14.3812	-4.54265	0.946996	-4.79691	1.61e-06	0.000132516	CDK15
309	57.0362	-4.52709	0.749178	-6.04275	1.52e-09	3.33e-07	ANXA6
1001	27.0658	-4.2212	0.915028	-4.61319	3.97e-06	0.000291965	CDH3
56977	78.0749	-4.08239	0.529199	-7.71428	1.22e-14	7.78e-12	STOX2
157869	214.592	-3.91162	0.488388	-8.00923	1.15e-15	8.54e-13	SBSPON
10826	17.6607	-3.84642	0.984535	-3.90684	9.35e-05	0.00383967	FAXDC2
7504	141.841	-3.63391	0.411211	-8.83708	9.82e-19	1.26e-15	XK
4133	54.4184	-3.61631	1.12313	-3.21985	0.00128256	0.0310442	MAP2
9507	34.6644	-3.49144	0.943244	-3.70152	0.000214314	0.00753473	ADAMTS4
3606	124.176	-3.47216	0.511493	-6.78829	1.13e-11	3.63e-09	IL18
25854	37.0369	-3.43969	0.607359	-5.66334	1.48e-08	2.37e-06	FAM149A
10551	40.7769	-3.31005	0.820739	-4.03301	5.51e-05	0.00245844	AGR2
4322	17.6317	-3.29157	1.04351	-3.15433	0.00160864	0.0364289	MMP13
2041	20.4145	-3.24394	1.00059	-3.24203	0.0011868	0.0292294	EPHA1
159963	13.4684	-3.16744	0.990582	-3.19756	0.00138598	0.0328062	SLC5A12
128218	49.9144	-3.13271	0.892446	-3.51026	0.000447677	0.013746	TMEM125
109504726	42.0492	-2.8115	0.706446	-3.97979	6.9e-05	0.00298469	ERV3-1-ZNF117
10267	302.92	-2.68969	0.740197	-3.63374	0.00027934	0.00942052	RAMP1
54836	48.9492	-2.68668	0.475832	-5.64629	1.64e-08	2.53e-06	BSPRY
149466	50.3512	-2.68209	0.53878	-4.97808	6.42e-07	5.86e-05	C1orf210
6523	29.8173	-2.67167	0.58076	-4.6003	4.22e-06	0.000307403	SLC5A1
56099	22.3583	-2.61286	0.725133	-3.60328	0.000314221	0.0104465	PCDHGB7
9982	43.3578	-2.59182	0.669614	-3.87062	0.000108561	0.00432248	FGFBP1
6000	58.1252	-2.53506	0.429575	-5.90131	3.61e-09	6.85e-07	RGS7
91862	196.841	-2.53002	0.339601	-7.44997	9.34e-14	4.24e-11	MARVELD3
58495	24.4316	-2.50645	0.658038	-3.80897	0.000139549	0.00534735	OVOL2
647024	84.9583	-2.46088	0.59084	-4.16505	3.11e-05	0.00157466	C6orf132
8622	111.162	-2.45957	0.357792	-6.8743	6.23e-12	2.25e-09	PDE8B
923	30.9939	-2.42199	0.618292	-3.91722	8.96e-05	0.00372692	CD6
956	18.0722	-2.38267	0.714521	-3.33464	0.000854094	0.0228783	ENTPD3
29113	367.121	-2.37257	0.157803	-15.035	4.33e-51	6.09e-47	C6orf15
23314	70.5967	-2.37186	0.451074	-5.25824	1.45e-07	1.69e-05	SATB2
7481	346.658	-2.31786	0.740508	-3.13009	0.00174752	0.0386405	WNT11
4143	48.4676	-2.31269	0.43235	-5.34912	8.84e-08	1.14e-05	MAT1A
5079	34.4526	-2.28917	0.570744	-4.01086	6.05e-05	0.00268388	PAX5
54848	316.619	-2.24712	0.218154	-10.3006	7e-25	3.28e-21	ARHGEF38
8522	107.669	-2.2444	0.29476	-7.61434	2.65e-14	1.62e-11	GAS7
6335	171.891	-2.22595	0.548387	-4.05909	4.93e-05	0.00227896	SCN9A
51313	552.235	-2.1803	0.279931	-7.78872	6.77e-15	4.53e-12	GASK1B
945	26.3045	-2.17252	0.570045	-3.81114	0.000138326	0.00531498	CD33
58499	47.6843	-2.16769	0.430018	-5.04092	4.63e-07	4.4e-05	ZNF462
59084	33.5542	-2.16507	0.51376	-4.21417	2.51e-05	0.00133038	ENPP5
5865	14.7493	-2.14683	0.699474	-3.06921	0.00214626	0.0445174	RAB3B
284958	49.8667	-2.13786	0.510795	-4.18535	2.85e-05	0.00148299	NT5DC4
130367	177.244	-2.13537	0.243127	-8.78291	1.59e-18	1.87e-15	SGPP2
94122	48.1398	-2.06148	0.671281	-3.07096	0.00213374	0.0444545	SYTL5
57402	336.332	-1.99512	0.318011	-6.27373	3.52e-10	8.4e-08	S100A14
5639	20.8494	-1.964	0.559492	-3.51033	0.000447546	0.013746	PRRG2
4005	43.7751	-1.91003	0.441093	-4.33022	1.49e-05	0.000891418	LMO2
202	95.3586	-1.90357	0.305703	-6.22687	4.76e-10	1.12e-07	CRYBG1
3575	189.759	-1.87576	0.424551	-4.41821	9.95e-06	0.000639067	IL7R
54852	312.419	-1.85796	0.150789	-12.3216	6.93e-35	4.87e-31	PAQR5
10855	23.7581	-1.85703	0.532898	-3.48477	0.000492559	0.0146606	HPSE
7318	18.7584	-1.84574	0.606537	-3.04307	0.00234176	0.0477394	UBA7
5023	33.3455	-1.83171	0.571348	-3.20594	0.00134621	0.0322518	P2RX1
80008	232.852	-1.81545	0.190085	-9.55069	1.29e-21	3.02e-18	TMEM156
1674	64.3248	-1.79085	0.401315	-4.46246	8.1e-06	0.000527513	DES
3790	46.3598	-1.77007	0.438125	-4.04009	5.34e-05	0.00239756	KCNS3
255738	462.03	-1.73827	0.525912	-3.30524	0.00094894	0.0249438	PCSK9
84166	209.74	-1.71963	0.39514	-4.35195	1.35e-05	0.000825017	NLRC5
60489	128.501	-1.69334	0.31154	-5.43539	5.47e-08	7.39e-06	APOBEC3G
2273	2229.62	-1.68997	0.24732	-6.83314	8.31e-12	2.78e-09	FHL1
8796	643.006	-1.68285	0.384675	-4.37472	1.22e-05	0.000756582	SCEL
5268	109.478	-1.65691	0.468338	-3.53784	0.000403415	0.0127053	SERPINB5
283455	92.8521	-1.6523	0.336722	-4.90702	9.25e-07	8.12e-05	KSR2
4610	101.818	-1.63745	0.358154	-4.57192	4.83e-06	0.000344983	MYCL
51454	216.617	-1.63252	0.32776	-4.98086	6.33e-07	5.83e-05	GULP1
26112	52.7809	-1.62479	0.363367	-4.47147	7.77e-06	0.000510495	CCDC69
7127	388.192	-1.61656	0.359967	-4.49086	7.09e-06	0.000477314	TNFAIP2
7098	168.989	-1.61575	0.335251	-4.81951	1.44e-06	0.000120465	TLR3
9699	87.0408	-1.59295	0.277371	-5.74303	9.3e-09	1.58e-06	RIMS2
9246	78.653	-1.57908	0.389842	-4.05055	5.11e-05	0.00233301	UBE2L6
126695	137.596	-1.5665	0.260839	-6.00562	1.91e-09	3.94e-07	KDF1
933	165.186	-1.56591	0.273157	-5.73264	9.89e-09	1.66e-06	CD22
1736	4925.64	-1.56072	0.354716	-4.39993	1.08e-05	0.00068907	DKC1
91050	56.7561	-1.55437	0.51246	-3.03316	0.00242006	0.048619	CCDC149
5349	83.763	-1.55065	0.471866	-3.28621	0.00101546	0.0263963	FXYD3
7325	296.669	-1.54979	0.389711	-3.97676	6.99e-05	0.00301364	UBE2E2
731220	104.681	-1.54724	0.380658	-4.06464	4.81e-05	0.0022328	RFX8
250	94.3536	-1.5407	0.271414	-5.67657	1.37e-08	2.22e-06	ALPP
81792	38.8467	-1.52353	0.435167	-3.50101	0.000463491	0.0141084	ADAMTS12
83690	52.5407	-1.52306	0.362707	-4.19916	2.68e-05	0.00140583	CRISPLD1
84034	146.522	-1.52182	0.33955	-4.48187	7.4e-06	0.000493157	EMILIN2
23025	49.0458	-1.50276	0.353201	-4.25468	2.09e-05	0.00115005	UNC13A
23096	117.248	-1.49683	0.387062	-3.86715	0.000110114	0.00436205	IQSEC2
150368	190.304	-1.47758	0.374033	-3.9504	7.8e-05	0.00331475	PHETA2
3382	261.898	-1.47608	0.268851	-5.49032	4.01e-08	5.64e-06	ICA1
63895	37.6457	-1.46415	0.460263	-3.18112	0.00146705	0.0339887	PIEZO2
29106	44.5138	-1.46404	0.445821	-3.28392	0.00102376	0.0264653	SCG3
375775	101.271	-1.46388	0.28902	-5.06499	4.08e-07	3.96e-05	PNPLA7
55800	89.4524	-1.46151	0.285687	-5.11579	3.12e-07	3.14e-05	SCN3B
5724	105.99	-1.45609	0.382814	-3.80364	0.000142587	0.00543415	PTAFR
123036	311.646	-1.44922	0.311289	-4.65553	3.23e-06	0.000246108	TC2N
653499	91.0348	-1.44204	0.411372	-3.50543	0.000455874	0.0139066	LGALS7B
55503	183.359	-1.41135	0.213747	-6.6029	4.03e-11	1.13e-08	TRPV6
3664	274.028	-1.38337	0.332008	-4.16666	3.09e-05	0.00157466	IRF6
54682	816.229	-1.37295	0.181039	-7.58373	3.36e-14	1.97e-11	MANSC1
84456	738.692	-1.36792	0.349334	-3.9158	9.01e-05	0.00373792	L3MBTL3
5336	133.521	-1.35395	0.264919	-5.11081	3.21e-07	3.2e-05	PLCG2
84293	419.813	-1.35342	0.245408	-5.51496	3.49e-08	5.05e-06	PRXL2A
7718	200.173	-1.3496	0.191886	-7.03335	2.02e-12	7.66e-10	ZNF165
348	184.558	-1.332	0.399146	-3.33713	0.000846487	0.0227178	APOE
83715	254.626	-1.33075	0.418714	-3.17818	0.00148203	0.0341109	ESPN
118788	248.678	-1.32519	0.321833	-4.11762	3.83e-05	0.00187572	PIK3AP1
51087	139.338	-1.31368	0.377404	-3.48083	0.000499867	0.0147681	YBX2
1780	69.3735	-1.30432	0.342802	-3.80489	0.000141865	0.00542133	DYNC1I1
79772	508.01	-1.29281	0.398137	-3.24715	0.00116567	0.0288194	MCTP1
6262	125.925	-1.29135	0.375995	-3.43448	0.000593683	0.0170735	RYR2
120071	1341.29	-1.28857	0.353799	-3.6421	0.000270421	0.00916367	LARGE2
8324	77.9953	-1.27521	0.381906	-3.33908	0.000840556	0.0226451	FZD7
130399	75.0152	-1.25366	0.366798	-3.41783	0.00063122	0.0180424	ACVR1C
6337	1110.07	-1.24476	0.381621	-3.26176	0.00110724	0.0280056	SCNN1A
390874	82.5047	-1.24383	0.307515	-4.04479	5.24e-05	0.0023757	ONECUT3
57198	445.724	-1.24215	0.355969	-3.48949	0.000483938	0.0145109	ATP8B2
59341	155.567	-1.23538	0.307227	-4.02106	5.79e-05	0.0025784	TRPV4
9966	130.89	-1.2152	0.294082	-4.1322	3.59e-05	0.00176676	TNFSF15
81849	61.0044	-1.20883	0.370148	-3.2658	0.00109154	0.0277082	ST6GALNAC5
162394	637.951	-1.19749	0.342204	-3.49936	0.000466384	0.0141658	SLFN5
57338	42.0114	-1.18926	0.378376	-3.14307	0.00167188	0.03732	JPH3
23138	107.435	-1.17579	0.275222	-4.27215	1.94e-05	0.00108471	N4BP3
200879	77.751	-1.17041	0.385777	-3.03391	0.00241409	0.0485684	LIPH
136853	108.093	-1.16412	0.376642	-3.09079	0.00199622	0.0427061	SSC4D
6307	1121.72	-1.16344	0.211022	-5.51335	3.52e-08	5.05e-06	MSMO1
200407	66.5047	-1.15984	0.315903	-3.67149	0.000241136	0.00827096	CREG2
283358	247.083	-1.1568	0.177877	-6.50334	7.86e-11	2.12e-08	B4GALNT3
83481	160.551	-1.13928	0.284685	-4.00189	6.28e-05	0.00277021	EPPK1
3908	83.9007	-1.1318	0.276463	-4.09385	4.24e-05	0.00205035	LAMA2
51700	111.154	-1.1264	0.282114	-3.9927	6.53e-05	0.00284422	CYB5R2
347733	1714.82	-1.10301	0.167583	-6.58187	4.65e-11	1.28e-08	TUBB2B
10410	844.93	-1.0901	0.145351	-7.49975	6.39e-14	3.21e-11	IFITM3
4853	579.637	-1.0879	0.195649	-5.56048	2.69e-08	4.07e-06	NOTCH2
26996	95.0264	-1.08255	0.289583	-3.73831	0.000185261	0.00678469	GPR160
25840	137.54	-1.07271	0.286383	-3.74571	0.000179886	0.00663975	METTL7A
118429	137.406	-1.0714	0.212205	-5.04888	4.44e-07	4.25e-05	ANTXR2
152	882.304	-1.0527	0.124111	-8.48189	2.22e-17	2.4e-14	ADRA2C
157506	2219.26	-1.04893	0.203617	-5.1515	2.58e-07	2.69e-05	RDH10
55561	356.307	-1.03337	0.223249	-4.62877	3.68e-06	0.000273707	CDC42BPG
5653	1538.5	-1.02855	0.201653	-5.10057	3.39e-07	3.33e-05	KLK6
346157	120.39	-1.02602	0.275256	-3.72752	0.000193374	0.00697287	ZNF391
4320	70.087	-1.01796	0.310935	-3.27388	0.0010608	0.0272265	MMP11
51561	1874.44	-1.00752	0.30169	-3.3396	0.000838987	0.0226451	IL23A
4040	6109.59	-1.006	0.191058	-5.26541	1.4e-07	1.67e-05	LRP6
146206	1181.91	-0.988909	0.109078	-9.06604	1.23e-19	1.93e-16	CARMIL2
54845	3270.67	-0.976056	0.309185	-3.15686	0.00159476	0.0361727	ESRP1
10580	148.502	-0.975791	0.227643	-4.2865	1.82e-05	0.00104616	SORBS1
2248	2674.15	-0.972806	0.0980399	-9.92255	3.32e-23	9.34e-20	FGF3
1302	120.548	-0.96647	0.284001	-3.40305	0.000666389	0.0187429	COL11A2
58191	102.328	-0.964929	0.288322	-3.34671	0.000817776	0.0221587	CXCL16
55268	177.475	-0.963768	0.268673	-3.58715	0.000334314	0.0109083	ECHDC2
199731	170.815	-0.959004	0.212364	-4.51585	6.31e-06	0.000432622	CADM4
57501	93.4519	-0.952007	0.279744	-3.40314	0.000666164	0.0187429	CFAP92
51760	264.635	-0.950664	0.188918	-5.03214	4.85e-07	4.58e-05	SYT17
26038	291.894	-0.938895	0.27101	-3.46443	0.000531363	0.0155678	CHD5
3431	222.947	-0.93741	0.218244	-4.29524	1.75e-05	0.0010183	SP110
9053	1316.48	-0.9374	0.131081	-7.15133	8.59e-13	3.36e-10	MAP7
201181	110.238	-0.932172	0.283275	-3.2907	0.00099938	0.0261232	ZNF385C
1717	3212.61	-0.888026	0.181985	-4.87966	1.06e-06	9.11e-05	DHCR7
26140	325.457	-0.858078	0.200515	-4.27937	1.87e-05	0.00106278	TTLL3
219699	2448.9	-0.85786	0.115738	-7.41208	1.24e-13	5.46e-11	UNC5B
85461	764.296	-0.853701	0.199797	-4.27285	1.93e-05	0.00108471	TANC1
126432	258.626	-0.843843	0.168929	-4.99525	5.88e-07	5.51e-05	RINL
57707	223.46	-0.839672	0.252173	-3.32975	0.000869235	0.0231516	MEAK7
284656	174.703	-0.835897	0.256725	-3.256	0.00112992	0.0282027	EPHA10
1718	1813.35	-0.830951	0.262605	-3.16426	0.00155477	0.0355525	DHCR24
92359	192.993	-0.817433	0.262275	-3.1167	0.00182889	0.0397521	CRB3
3157	1362.74	-0.815442	0.171317	-4.75983	1.94e-06	0.000155704	HMGCS1
84869	1079.62	-0.814617	0.19389	-4.20145	2.65e-05	0.00139687	CBR4
123879	503.886	-0.813378	0.264354	-3.07685	0.00209197	0.0439753	DCUN1D3
92370	179.865	-0.810033	0.249541	-3.24609	0.00117003	0.0288668	PXYLP1
254887	355.862	-0.809079	0.241696	-3.34751	0.000815404	0.0221371	ZDHHC23
175	368.417	-0.806696	0.206968	-3.8977	9.71e-05	0.00394708	AGA
57577	102.791	-0.800883	0.261858	-3.05847	0.0022247	0.0458738	CCDC191
2241	756.29	-0.792147	0.210108	-3.77019	0.000163123	0.00611843	FER
200316	378.602	-0.79088	0.201381	-3.92728	8.59e-05	0.00360644	APOBEC3F
23678	308.228	-0.790781	0.193369	-4.0895	4.32e-05	0.0020749	SGK3
3638	351.193	-0.788915	0.169071	-4.66618	3.07e-06	0.00023581	INSIG1
84879	209.448	-0.780363	0.238761	-3.26839	0.00108163	0.0276152	MFSD2A
729830	148.024	-0.77798	0.206265	-3.77175	0.000162108	0.00611843	FAM160A1
11274	190.148	-0.777053	0.228589	-3.39935	0.000675453	0.0189599	USP18
10279	244.95	-0.773879	0.202414	-3.82325	0.000131702	0.00510227	PRSS16
23467	156.492	-0.771957	0.231593	-3.33326	0.000858357	0.0229088	NPTXR
23491	110.829	-0.764551	0.252221	-3.03128	0.00243519	0.0488531	CES3
2053	207.665	-0.763078	0.211873	-3.60158	0.000316291	0.0104659	EPHX2
116986	210.587	-0.76055	0.251257	-3.02698	0.00247009	0.0494124	AGAP2
100131211	620.029	-0.757624	0.131177	-5.7756	7.67e-09	1.35e-06	NEMP2
79838	309.315	-0.75742	0.212516	-3.56407	0.000365153	0.0117778	TMC5
22901	882.352	-0.754859	0.133478	-5.65529	1.56e-08	2.43e-06	ARSG
285362	212.935	-0.738404	0.226464	-3.26058	0.00111187	0.0280721	SUMF1
146223	3053.4	-0.73549	0.127363	-5.77475	7.71e-09	1.35e-06	CMTM4
54756	415.366	-0.733031	0.176539	-4.15222	3.29e-05	0.00165372	IL17RD
282973	214.851	-0.728633	0.194259	-3.75083	0.000176252	0.00655724	JAKMIP3
8303	141.809	-0.725623	0.219198	-3.31035	0.000931802	0.0245852	SNN
23710	245.29	-0.724286	0.203636	-3.55677	0.000375443	0.012027	GABARAPL1
55247	452.876	-0.722291	0.219659	-3.28823	0.00100819	0.026256	NEIL3
192683	191.421	-0.721621	0.230727	-3.1276	0.00176241	0.0387721	SCAMP5
201973	320.161	-0.71574	0.16301	-4.39079	1.13e-05	0.000712239	PRIMPOL
3422	1111.49	-0.703476	0.166409	-4.22739	2.36e-05	0.001269	IDI1
2318	431.941	-0.701068	0.228744	-3.06485	0.00217777	0.0450383	FLNC
56479	942.399	-0.700992	0.169394	-4.13824	3.5e-05	0.00174427	KCNQ5
79682	1086.44	-0.685648	0.153376	-4.47038	7.81e-06	0.000510714	CENPU
23089	2800.86	-0.684289	0.183373	-3.73168	0.000190204	0.00691172	PEG10
2243	187.452	-0.684032	0.225253	-3.03673	0.00239163	0.0483819	FGA
57587	3779.82	-0.682323	0.111347	-6.12788	8.91e-10	2.02e-07	CFAP97
3164	169.454	-0.681148	0.215304	-3.16365	0.00155802	0.0355677	NR4A1
57674	3746.09	-0.673459	0.17863	-3.77015	0.000163152	0.00611843	RNF213
4925	1734.25	-0.670817	0.136444	-4.91641	8.81e-07	7.85e-05	NUCB2
3985	438.167	-0.668897	0.156981	-4.261	2.04e-05	0.00112676	LIMK2
200765	388.816	-0.663555	0.218335	-3.03916	0.00237242	0.0481433	TIGD1
11275	969.952	-0.663262	0.19096	-3.47331	0.000514078	0.0151562	KLHL2
3177	398.975	-0.659444	0.154285	-4.27418	1.92e-05	0.00108347	SLC29A2
146198	240.432	-0.645131	0.174678	-3.69326	0.000221399	0.00772588	ZFP90
6653	4520.34	-0.637808	0.140812	-4.52951	5.91e-06	0.000411583	SORL1
11226	655.477	-0.634982	0.129633	-4.89832	9.67e-07	8.34e-05	GALNT6
291	1398.6	-0.633289	0.131374	-4.8205	1.43e-06	0.000120465	SLC25A4
22943	588.751	-0.626397	0.130526	-4.79903	1.59e-06	0.000131891	DKK1
1788	602.518	-0.618557	0.173066	-3.57412	0.000351413	0.0114132	DNMT3A
6940	395.451	-0.616256	0.158079	-3.8984	9.68e-05	0.00394699	ZNF354A
23779	752.215	-0.612489	0.111878	-5.47462	4.38e-08	6.1e-06	ARHGAP8
30837	1658.29	-0.607818	0.119021	-5.10679	3.28e-07	3.25e-05	SOCS7
631	438.96	-0.603192	0.140751	-4.28551	1.82e-05	0.00104653	BFSP1

## Sheet: UP_BP
Supplementary table 2c: Upregulated biological processes upon DKC1 silencing in SW620 cells.
Category	Term	Count	%	PValue	Genes	List Total	Pop Hits	Pop Total	Fold Enrichment	Bonferroni	Benjamini	FDR
GOTERM_BP_DIRECT	GO:0048566~embryonic digestive tract development	4	2.29885	0.000296566	TGFB2, CXCL8, FOXF2, RARRES2	162	16	19256	29.716	0.315501	0.157543	0.157297
GOTERM_BP_DIRECT	GO:0045944~positive regulation of transcription from RNA polymerase II promoter	23	13.2184	0.000432934	JUN, FOXC1, EGR3, GMEB2, FOXF2, KMT2C, NR2F1, MOSPD1, HMGA2, SMARCA2, BATF, GLIS2, BMP4, KLF6, CREB3L2, HOXB3, HOXB2, CAMK1, CCN1, ZNF786, ZFPM2, JUNB, PITX1	162	1201	19256	2.27633	0.425014	0.157543	0.157297
GOTERM_BP_DIRECT	GO:0006357~regulation of transcription from RNA polymerase II promoter	29	16.6667	0.000472082	FOXC1, GMEB2, ZBTB46, GLIS2, REPIN1, CREB3L2, ZNF786, JUNB, PITX1, JUN, EGR3, FOXF2, NR2F1, SMARCA2, LIME1, BATF, KLF6, ZNF813, HOXB3, HOXB2, ZNF777, MKX, ZNF775, ZFPM2, KDM7A, SLC2A4RG, ZNF212, ZNF398, CREB5	162	1721	19256	2.00294	0.453086	0.157543	0.157297
GOTERM_BP_DIRECT	GO:0008285~negative regulation of cell proliferation	13	7.47126	0.000493093	CGREF1, TGFB2, JUN, BTG2, CXCL8, DUSP1, TESC, STK4, SMARCA2, TSPAN32, BMP4, TRIM24, ZNF777	162	459	19256	3.36652	0.467583	0.157543	0.157297
GOTERM_BP_DIRECT	GO:0003148~outflow tract septum morphogenesis	4	2.29885	0.00115262	BMP4, TGFB2, ZFPM2, ROBO1	162	25	19256	19.0183	0.770968	0.294609	0.294148
GOTERM_BP_DIRECT	GO:0051726~regulation of cell cycle	10	5.74713	0.00139295	TGFB2, JUN, CXCL8, CDK5, DUSP1, RHEB, GADD45A, CABLES1, HMGA2, JUNB	162	316	19256	3.76153	0.831603	0.296698	0.296234
GOTERM_BP_DIRECT	GO:0090314~positive regulation of protein targeting to membrane	4	2.29885	0.00217145	TCAF1, CDK5, STOM, PDZK1	162	31	19256	15.3373	0.937845	0.396444	0.395824
GOTERM_BP_DIRECT	GO:0001822~kidney development	6	3.44828	0.00326205	BMP4, TGFB2, FOXC1, SERPINF1, HAS2, BICC1	162	119	19256	5.99315	0.984636	0.521113	0.520297
GOTERM_BP_DIRECT	GO:0045892~negative regulation of transcription, DNA-templated	13	7.47126	0.004068	JUN, FOXF2, HMGA2, SMARCA2, GLIS2, BMP4, DNAJB6, CDK5, TRIM24, ZNF777, NELFCD, ZFPM2, PITX1	162	590	19256	2.61904	0.994536	0.568868	0.567978
GOTERM_BP_DIRECT	GO:0010976~positive regulation of neuron projection development	6	3.44828	0.00445123	NTRK2, SERPINF1, CREB3L2, ROR1, CAMK1, EPHA3	162	128	19256	5.57176	0.996659	0.568868	0.567978
GOTERM_BP_DIRECT	GO:0001837~epithelial to mesenchymal transition	4	2.29885	0.00669287	TGFB2, FOXF2, HMGA2, SNAI2	162	46	19256	10.336	0.999813	0.709378	0.708268
GOTERM_BP_DIRECT	GO:0003184~pulmonary valve morphogenesis	3	1.72414	0.00679173	BMP4, TGFB2, ROBO1	162	15	19256	23.7728	0.999835	0.709378	0.708268
GOTERM_BP_DIRECT	GO:0045893~positive regulation of transcription, DNA-templated	14	8.04598	0.0072159	JUN, FOXC1, FOXF2, TESC, HMGA2, SMARCA2, GLIS2, BMP4, KLF6, CREB3L2, TRIM24, KDM7A, ZNF398, CREB5	162	716	19256	2.32416	0.999904	0.709378	0.708268
GOTERM_BP_DIRECT	GO:0021954~central nervous system neuron development	3	1.72414	0.0108215	NTRK2, BTG2, CDK5	162	19	19256	18.768	0.999999	0.987852	0.986306
GOTERM_BP_DIRECT	GO:0035556~intracellular signal transduction	10	5.74713	0.0135725	SOCS2, CXCL8, NUAK2, DUSP1, CHN2, ARHGAP29, HSPB1, HMGA2, STK4, SGK2	162	450	19256	2.64143	1	1	0.999217
GOTERM_BP_DIRECT	GO:0043525~positive regulation of neuron apoptotic process	4	2.29885	0.015797	TGFB2, NQO2, JUN, CDK5	162	63	19256	7.54693	1	1	0.999217
GOTERM_BP_DIRECT	GO:0001570~vasculogenesis	4	2.29885	0.015797	NTRK2, HAS2, ZFPM2, JUNB	162	63	19256	7.54693	1	1	0.999217
GOTERM_BP_DIRECT	GO:0060395~SMAD protein signal transduction	4	2.29885	0.0164742	BMP4, TGFB2, JUN, NCEH1	162	64	19256	7.42901	1	1	0.999217
GOTERM_BP_DIRECT	GO:2000319~regulation of T-helper 17 cell differentiation	2	1.14943	0.0166526	JUNB, BATF	162	2	19256	118.864	1	1	0.999217
GOTERM_BP_DIRECT	GO:0032331~negative regulation of chondrocyte differentiation	3	1.72414	0.0169967	BMP4, SNAI2, MKX	162	24	19256	14.858	1	1	0.999217
GOTERM_BP_DIRECT	GO:0050680~negative regulation of epithelial cell proliferation	4	2.29885	0.0193446	BMP4, TGFB2, TRIM24, STK4	162	68	19256	6.99201	1	1	0.999217
GOTERM_BP_DIRECT	GO:0043065~positive regulation of apoptotic process	8	4.5977	0.0205852	BMP4, JUN, DUSP1, GADD45A, LPAR1, HMGA2, CCN1, STK4	162	328	19256	2.89913	1	1	0.999217
GOTERM_BP_DIRECT	GO:0033674~positive regulation of kinase activity	4	2.29885	0.0232966	EPHB6, NTRK2, ROR1, EPHA3	162	73	19256	6.51311	1	1	0.999217
GOTERM_BP_DIRECT	GO:0071300~cellular response to retinoic acid	4	2.29885	0.0241356	TESC, SERPINF1, FZD10, EPHA3	162	74	19256	6.42509	1	1	0.999217
GOTERM_BP_DIRECT	GO:0007169~transmembrane receptor protein tyrosine kinase signaling pathway	5	2.87356	0.0249441	EPHB6, NTRK2, CASS4, ROR1, EPHA3	162	132	19256	4.50243	1	1	0.999217
GOTERM_BP_DIRECT	GO:0032092~positive regulation of protein binding	4	2.29885	0.0267499	EPHB6, BMP4, CDK5, STK4	162	77	19256	6.17476	1	1	0.999217
GOTERM_BP_DIRECT	GO:0050772~positive regulation of axonogenesis	3	1.72414	0.027568	NTRK2, METRN, ROBO1	162	31	19256	11.503	1	1	0.999217
GOTERM_BP_DIRECT	GO:0030154~cell differentiation	12	6.89655	0.0278675	NTRK2, FOXC1, RNF114, HIP1, PPDPF, RARRES2, NR2F1, MOSPD1, ANKS4B, CAMK1, ZFPM2, BATF	162	680	19256	2.0976	1	1	0.999217
GOTERM_BP_DIRECT	GO:0003180~aortic valve morphogenesis	3	1.72414	0.0292471	BMP4, SNAI2, ROBO1	162	32	19256	11.1435	1	1	0.999217
GOTERM_BP_DIRECT	GO:0000122~negative regulation of transcription from RNA polymerase II promoter	15	8.62069	0.0322955	JUN, BTG2, FOXC1, GADD45A, ZBTB46, NR2F1, MOSPD1, HMGA2, SMARCA2, GLIS2, BMP4, HOXB3, SNAI2, ZFPM2, ZNF398	162	967	19256	1.84381	1	1	0.999217
GOTERM_BP_DIRECT	GO:0035990~tendon cell differentiation	2	1.14943	0.0330296	BMP4, MKX	162	4	19256	59.4321	1	1	0.999217
GOTERM_BP_DIRECT	GO:0007275~multicellular organism development	6	3.44828	0.0358633	EPHB6, NTRK2, HMGA2, ROR1, HOXB2, EPHA3	162	217	19256	3.28657	1	1	0.999217
GOTERM_BP_DIRECT	GO:0048709~oligodendrocyte differentiation	3	1.72414	0.0382247	NTRK2, CDK5, RHEB	162	37	19256	9.63764	1	1	0.999217
GOTERM_BP_DIRECT	GO:0060412~ventricular septum morphogenesis	3	1.72414	0.0382247	TGFB2, ZFPM2, ROBO1	162	37	19256	9.63764	1	1	0.999217
GOTERM_BP_DIRECT	GO:0071347~cellular response to interleukin-1	4	2.29885	0.039749	AKAP12, CXCL8, SIRPA, HAS2	162	90	19256	5.28285	1	1	0.999217
GOTERM_BP_DIRECT	GO:0061077~chaperone-mediated protein folding	3	1.72414	0.0460605	DNAJB6, DNAJC5, HSPB1	162	41	19256	8.69738	1	1	0.999217
GOTERM_BP_DIRECT	GO:0002320~lymphoid progenitor cell differentiation	2	1.14943	0.0491354	BMP4, BATF	162	6	19256	39.6214	1	1	0.999217
GOTERM_BP_DIRECT	GO:0034504~protein localization to nucleus	3	1.72414	0.0501804	BMP4, NUAK2, DNAJB6	162	43	19256	8.29285	1	1	0.999217
GOTERM_BP_DIRECT	GO:0070527~platelet aggregation	3	1.72414	0.0544278	GNAS, HSPB1, TSPAN32	162	45	19256	7.92428	1	1	0.999217
GOTERM_BP_DIRECT	GO:0060710~chorio-allantoic fusion	2	1.14943	0.0570881	DNAJB6, CCN1	162	7	19256	33.9612	1	1	0.999217
GOTERM_BP_DIRECT	GO:0007399~nervous system development	8	4.5977	0.0595007	NTRK2, NR2F1, CABLES1, HOXB2, CAMK1, L1CAM, SMARCA2, ROBO1	162	414	19256	2.29689	1	1	0.999217
GOTERM_BP_DIRECT	GO:1902895~positive regulation of pri-miRNA transcription from RNA polymerase II promoter	3	1.72414	0.061026	BMP4, TGFB2, JUN	162	48	19256	7.42901	1	1	0.999217
GOTERM_BP_DIRECT	GO:0010718~positive regulation of epithelial to mesenchymal transition	3	1.72414	0.0632834	BMP4, TGFB2, FOXC1	162	49	19256	7.2774	1	1	0.999217
GOTERM_BP_DIRECT	GO:0007165~signal transduction	17	9.77011	0.0649244	CHRNA1, GABRA2, IGFBP1, PLEKHH3, CXCL8, METRN, NR2F1, STK4, AKAP12, ARFRP1, LMBR1, RHEB, CHN2, ZYX, CAMK1, CCN1, CAP2	162	1267	19256	1.59486	1	1	0.999217
GOTERM_BP_DIRECT	GO:0044829~positive regulation by host of viral genome replication	2	1.14943	0.0649747	VAPB, STOM	162	8	19256	29.716	1	1	0.999217
GOTERM_BP_DIRECT	GO:0003149~membranous septum morphogenesis	2	1.14943	0.0649747	BMP4, TGFB2	162	8	19256	29.716	1	1	0.999217
GOTERM_BP_DIRECT	GO:0046777~protein autophosphorylation	5	2.87356	0.0656288	NTRK2, MEX3B, CDK5, TRIM24, STK4	162	181	19256	3.28354	1	1	0.999217
GOTERM_BP_DIRECT	GO:0018105~peptidyl-serine phosphorylation	5	2.87356	0.0656288	NTRK2, CDK5, CAMK1, STK4, SGK2	162	181	19256	3.28354	1	1	0.999217
GOTERM_BP_DIRECT	GO:0010628~positive regulation of gene expression	9	5.17241	0.0667675	BMP4, NTRK2, FOXC1, CXCL8, TESC, CREB3L2, TRIM24, HMGA2, ROBO1	162	513	19256	2.08534	1	1	0.999217
GOTERM_BP_DIRECT	GO:0007411~axon guidance	5	2.87356	0.0676922	EPHB6, UNC5A, SEMA3A, L1CAM, EPHA3	162	183	19256	3.24766	1	1	0.999217
GOTERM_BP_DIRECT	GO:0006913~nucleocytoplasmic transport	3	1.72414	0.070221	CDK5, CAMK1, RAE1	162	52	19256	6.85755	1	1	0.999217
GOTERM_BP_DIRECT	GO:0002062~chondrocyte differentiation	3	1.72414	0.0725865	BMP4, CREB3L2, HMGA2	162	53	19256	6.72816	1	1	0.999217
GOTERM_BP_DIRECT	GO:0021612~facial nerve structural organization	2	1.14943	0.0727957	SEMA3A, HOXB2	162	9	19256	26.4143	1	1	0.999217
GOTERM_BP_DIRECT	GO:2000020~positive regulation of male gonad development	2	1.14943	0.0727957	SEMA3A, ZFPM2	162	9	19256	26.4143	1	1	0.999217
GOTERM_BP_DIRECT	GO:0016477~cell migration	6	3.44828	0.0747206	TGFB2, FOXC1, CASS4, SIRPA, L1CAM, EPHA3	162	268	19256	2.66114	1	1	0.999217
GOTERM_BP_DIRECT	GO:0045600~positive regulation of fat cell differentiation	3	1.72414	0.0749776	RARRES2, SNAI2, STK4	162	54	19256	6.60357	1	1	0.999217
GOTERM_BP_DIRECT	GO:0022038~corpus callosum development	2	1.14943	0.0805517	CDK5, LPAR1	162	10	19256	23.7728	1	1	0.999217
GOTERM_BP_DIRECT	GO:0030203~glycosaminoglycan metabolic process	2	1.14943	0.0805517	FOXC1, XYLT2	162	10	19256	23.7728	1	1	0.999217
GOTERM_BP_DIRECT	GO:0061626~pharyngeal arch artery morphogenesis	2	1.14943	0.0805517	BMP4, TGFB2	162	10	19256	23.7728	1	1	0.999217
GOTERM_BP_DIRECT	GO:0006935~chemotaxis	4	2.29885	0.0842329	CXCL8, RARRES2, CCN1, L1CAM	162	123	19256	3.8655	1	1	0.999217
GOTERM_BP_DIRECT	GO:0009966~regulation of signal transduction	3	1.72414	0.0847856	SOCS2, LURAP1L, GNAS	162	58	19256	6.14815	1	1	0.999217
GOTERM_BP_DIRECT	GO:0001649~osteoblast differentiation	4	2.29885	0.0874121	BMP4, SNAI2, CCN1, JUNB	162	125	19256	3.80365	1	1	0.999217
GOTERM_BP_DIRECT	GO:0016525~negative regulation of angiogenesis	4	2.29885	0.0890206	TGFB2, FOXC1, GADD45A, SERPINF1	162	126	19256	3.77347	1	1	0.999217
GOTERM_BP_DIRECT	GO:0030199~collagen fibril organization	3	1.72414	0.0898279	TGFB2, COLGALT2, FOXC1	162	60	19256	5.94321	1	1	0.999217
GOTERM_BP_DIRECT	GO:0045597~positive regulation of cell differentiation	3	1.72414	0.0898279	CCN1, SMARCA2, JUNB	162	60	19256	5.94321	1	1	0.999217
GOTERM_BP_DIRECT	GO:0042475~odontogenesis of dentin-containing tooth	3	1.72414	0.0898279	BMP4, FOXC1, ROGDI	162	60	19256	5.94321	1	1	0.999217
GOTERM_BP_DIRECT	GO:0051216~cartilage development	3	1.72414	0.0923817	CREB3L2, HOXB3, PITX1	162	61	19256	5.84578	1	1	0.999217
GOTERM_BP_DIRECT	GO:0031175~neuron projection development	4	2.29885	0.0939203	BTG2, UNC5A, CDK5, L1CAM	162	129	19256	3.68571	1	1	0.999217
GOTERM_BP_DIRECT	GO:0071902~positive regulation of protein serine/threonine kinase activity	3	1.72414	0.0949566	HMGA2, CAMK1, STK4	162	62	19256	5.75149	1	1	0.999217
GOTERM_BP_DIRECT	GO:0003181~atrioventricular valve morphogenesis	2	1.14943	0.0958709	TGFB2, CCN1	162	12	19256	19.8107	1	1	0.999217
GOTERM_BP_DIRECT	GO:0060413~atrial septum morphogenesis	2	1.14943	0.0958709	TGFB2, CCN1	162	12	19256	19.8107	1	1	0.999217
GOTERM_BP_DIRECT	GO:0001934~positive regulation of protein phosphorylation	5	2.87356	0.0982202	BMP4, NTRK2, RARRES2, CCN1, STK4	162	209	19256	2.84364	1	1	0.999217

## Sheet: DOWN_BP
Supplementary table 2d: Downregulated biological processes upon DKC1 silencing in SW620 cells
Category	Term	Count	%	PValue	Genes	List Total	Pop Hits	Pop Total	Fold Enrichment	Bonferroni	Benjamini	FDR
GOTERM_BP_DIRECT	GO:0016126~sterol biosynthetic process	5	2.20264	3.3314e-05	CYB5R2, INSIG1, FAXDC2, MSMO1, DHCR7	205	18	19256	26.0921	0.0472531	0.0305404	0.0305404
GOTERM_BP_DIRECT	GO:0006695~cholesterol biosynthetic process	6	2.64317	4.20377e-05	IDI1, HMGCS1, INSIG1, MSMO1, DHCR24, DHCR7	205	37	19256	15.2322	0.0592539	0.0305404	0.0305404
GOTERM_BP_DIRECT	GO:2000647~negative regulation of stem cell proliferation	4	1.76211	0.00135365	WNT11, KDF1, IRF6, OVOL2	205	21	19256	17.8918	0.860289	0.484245	0.484245
GOTERM_BP_DIRECT	GO:0032020~ISG15-protein conjugation	3	1.32159	0.00162904	UBA7, UBE2E2, UBE2L6	205	6	19256	46.9659	0.906418	0.484245	0.484245
GOTERM_BP_DIRECT	GO:0072659~protein localization to plasma membrane	8	3.52423	0.00166636	RAB3B, KCNB2, ZDHHC23, MAP7, SCN3B, RAMP1, CRB3, LRP6	205	161	19256	4.66741	0.911366	0.484245	0.484245
GOTERM_BP_DIRECT	GO:0006816~calcium ion transport	6	2.64317	0.00269531	RYR2, TRPV6, TRPV4, ANXA6, RAMP1, BSPRY	205	90	19256	6.26211	0.98019	0.652715	0.652715
GOTERM_BP_DIRECT	GO:0060021~palate development	5	2.20264	0.00528203	SATB2, INSIG1, COL11A2, IRF6, LRP6	205	66	19256	7.11604	0.999545	1	1
GOTERM_BP_DIRECT	GO:0031663~lipopolysaccharide-mediated signaling pathway	4	1.76211	0.00808942	CD6, PTAFR, IL18, PLCG2	205	39	19256	9.63402	0.999993	1	1
GOTERM_BP_DIRECT	GO:0030198~extracellular matrix organization	7	3.0837	0.00835452	ADAMTS4, MMP11, C6ORF15, MMP13, COL11A2, ADAMTS12, SERPINB5	205	165	19256	3.98498	0.999995	1	1
GOTERM_BP_DIRECT	GO:0009636~response to toxic substance	5	2.20264	0.0137484	SNN, EPHX2, SLC6A14, DNMT3A, SCN9A	205	87	19256	5.39837	1	1	1
GOTERM_BP_DIRECT	GO:0006814~sodium ion transport	5	2.20264	0.015403	FXYD3, SCN9A, SLC5A12, SLC5A1, SCN3B	205	90	19256	5.21843	1	1	1
GOTERM_BP_DIRECT	GO:0010628~positive regulation of gene expression	12	5.28634	0.0212234	RIMS2, LGALS7B, WNT11, CDH3, EPHX2, AGR2, PLCG2, IL7R, DKK1, FGF3, TLR3, OVOL2	205	513	19256	2.19723	1	1	1
GOTERM_BP_DIRECT	GO:0042632~cholesterol homeostasis	5	2.20264	0.0247525	EPHX2, INSIG1, IL18, PCSK9, APOE	205	104	19256	4.51595	1	1	1
GOTERM_BP_DIRECT	GO:0010839~negative regulation of keratinocyte proliferation	3	1.32159	0.0264525	KDF1, EPPK1, IRF6	205	24	19256	11.7415	1	1	1
GOTERM_BP_DIRECT	GO:1903861~positive regulation of dendrite extension	3	1.32159	0.0264525	RIMS2, UNC13A, SYT17	205	24	19256	11.7415	1	1	1
GOTERM_BP_DIRECT	GO:0048168~regulation of neuronal synaptic plasticity	3	1.32159	0.0285554	JPH3, MCTP1, APOE	205	25	19256	11.2718	1	1	1
GOTERM_BP_DIRECT	GO:0032869~cellular response to insulin stimulus	5	2.20264	0.0287661	FER, INSIG1, PCSK9, SORBS1, SLC29A2	205	109	19256	4.30879	1	1	1
GOTERM_BP_DIRECT	GO:0030168~platelet activation	4	1.76211	0.0304458	FGA, P2RX1, PLCG2, ADRA2C	205	64	19256	5.87073	1	1	1
GOTERM_BP_DIRECT	GO:0032805~positive regulation of low-density lipoprotein particle receptor catabolic process	2	0.881057	0.0314484	PCSK9, APOE	205	3	19256	62.6211	1	1	1
GOTERM_BP_DIRECT	GO:0032959~inositol trisphosphate biosynthetic process	2	0.881057	0.0314484	PTAFR, PLCG2	205	3	19256	62.6211	1	1	1
GOTERM_BP_DIRECT	GO:0006887~exocytosis	5	2.20264	0.0340646	RIMS2, SCAMP5, TNFAIP2, SYTL5, SYT17	205	115	19256	4.08399	1	1	1
GOTERM_BP_DIRECT	GO:0051607~defense response to virus	7	3.0837	0.0367787	IFITM3, APOBEC3F, APOBEC3G, IL23A, NLRC5, TLR3, TRIM34	205	231	19256	2.84642	1	1	1
GOTERM_BP_DIRECT	GO:0033489~cholesterol biosynthetic process via desmosterol	2	0.881057	0.0417109	DHCR24, DHCR7	205	4	19256	46.9659	1	1	1
GOTERM_BP_DIRECT	GO:0090082~positive regulation of heart induction by negative regulation of canonical Wnt signaling pathway	2	0.881057	0.0417109	WNT11, DKK1	205	4	19256	46.9659	1	1	1
GOTERM_BP_DIRECT	GO:0033490~cholesterol biosynthetic process via lathosterol	2	0.881057	0.0417109	DHCR24, DHCR7	205	4	19256	46.9659	1	1	1
GOTERM_BP_DIRECT	GO:0016553~base conversion or substitution editing	2	0.881057	0.0417109	APOBEC3F, APOBEC3G	205	4	19256	46.9659	1	1	1
GOTERM_BP_DIRECT	GO:0060325~face morphogenesis	3	1.32159	0.0449975	CRISPLD1, DKK1, LRP6	205	32	19256	8.8061	1	1	1
GOTERM_BP_DIRECT	GO:0002230~positive regulation of defense response to virus by host	3	1.32159	0.0502035	APOBEC3F, APOBEC3G, IL23A	205	34	19256	8.28809	1	1	1
GOTERM_BP_DIRECT	GO:0015853~adenine transport	2	0.881057	0.0518653	SLC25A4, SLC29A2	205	5	19256	37.5727	1	1	1
GOTERM_BP_DIRECT	GO:0090244~Wnt signaling pathway involved in somitogenesis	2	0.881057	0.0518653	DKK1, LRP6	205	5	19256	37.5727	1	1	1
GOTERM_BP_DIRECT	GO:0001525~angiogenesis	7	3.0837	0.0521558	RNF213, UNC5B, IL18, TNFAIP2, EPHA1, RAMP1, OVOL2	205	252	19256	2.60921	1	1	1
GOTERM_BP_DIRECT	GO:0034765~regulation of ion transmembrane transport	5	2.20264	0.0543554	KCNB2, KCNS3, SCN9A, KCNQ5, SCN3B	205	134	19256	3.50491	1	1	1
GOTERM_BP_DIRECT	GO:0006641~triglyceride metabolic process	3	1.32159	0.0556143	INSIG1, PCSK9, APOE	205	36	19256	7.82764	1	1	1
GOTERM_BP_DIRECT	GO:0014068~positive regulation of phosphatidylinositol 3-kinase signaling	4	1.76211	0.0581434	UNC5B, IL18, AGAP2, PIK3AP1	205	83	19256	4.52683	1	1	1
GOTERM_BP_DIRECT	GO:0017157~regulation of exocytosis	3	1.32159	0.0583932	RIMS2, RAB3B, SEPTIN5	205	37	19256	7.61608	1	1	1
GOTERM_BP_DIRECT	GO:0009887~animal organ morphogenesis	5	2.20264	0.0593052	NOTCH2, LAMA2, FHL1, PAX5, FGF3	205	138	19256	3.40332	1	1	1
GOTERM_BP_DIRECT	GO:2001240~negative regulation of extrinsic apoptotic signaling pathway in absence of ligand	3	1.32159	0.0612192	UNC5B, AGAP2, SGK3	205	38	19256	7.41566	1	1	1
GOTERM_BP_DIRECT	GO:0048525~negative regulation of viral process	2	0.881057	0.0619125	APOBEC3F, APOBEC3G	205	6	19256	31.3106	1	1	1
GOTERM_BP_DIRECT	GO:0034105~positive regulation of tissue remodeling	2	0.881057	0.0619125	IL23A, IL18	205	6	19256	31.3106	1	1	1
GOTERM_BP_DIRECT	GO:0051142~positive regulation of NK T cell proliferation	2	0.881057	0.0619125	IL23A, IL18	205	6	19256	31.3106	1	1	1
GOTERM_BP_DIRECT	GO:0030326~embryonic limb morphogenesis	3	1.32159	0.0640911	NOTCH2, DKK1, LRP6	205	39	19256	7.22552	1	1	1
GOTERM_BP_DIRECT	GO:0030574~collagen catabolic process	3	1.32159	0.0699673	MMP11, MMP13, KLK6	205	41	19256	6.87305	1	1	1
GOTERM_BP_DIRECT	GO:0006897~endocytosis	6	2.64317	0.0707958	RINL, CD6, ILDR1, SSC4D, SORL1, LRP6	205	208	19256	2.70957	1	1	1
GOTERM_BP_DIRECT	GO:0019722~calcium-mediated signaling	4	1.76211	0.074274	RYR2, MCTP1, PLCG2, KSR2	205	92	19256	4.08399	1	1	1
GOTERM_BP_DIRECT	GO:0032735~positive regulation of interleukin-12 production	3	1.32159	0.0760121	IL23A, PLCG2, TLR3	205	43	19256	6.55337	1	1	1
GOTERM_BP_DIRECT	GO:0007275~multicellular organism development	6	2.64317	0.0813886	NOTCH2, MMP11, EPHA10, LMO2, PAX5, EPHA1	205	217	19256	2.59719	1	1	1
GOTERM_BP_DIRECT	GO:0045071~negative regulation of viral genome replication	3	1.32159	0.0853739	IFITM3, APOBEC3F, APOBEC3G	205	46	19256	6.12598	1	1	1
GOTERM_BP_DIRECT	GO:0022617~extracellular matrix disassembly	3	1.32159	0.0853739	ADAMTS4, MMP11, MMP13	205	46	19256	6.12598	1	1	1
GOTERM_BP_DIRECT	GO:0060070~canonical Wnt signaling pathway	4	1.76211	0.0860103	WNT11, FZD7, DKK1, LRP6	205	98	19256	3.83395	1	1	1
GOTERM_BP_DIRECT	GO:0051092~positive regulation of NF-kappaB transcription factor activity	5	2.20264	0.0902164	FER, IL18, PLCG2, TLR3, TRIM34	205	160	19256	2.93537	1	1	1
GOTERM_BP_DIRECT	GO:0061469~regulation of type B pancreatic cell proliferation	2	0.881057	0.0914229	NR4A1, SGPP2	205	9	19256	20.8737	1	1	1
GOTERM_BP_DIRECT	GO:2000726~negative regulation of cardiac muscle cell differentiation	2	0.881057	0.0914229	FZD7, DKK1	205	9	19256	20.8737	1	1	1
GOTERM_BP_DIRECT	GO:0032755~positive regulation of interleukin-6 production	4	1.76211	0.0963515	TRPV4, PTAFR, PLCG2, TLR3	205	103	19256	3.64783	1	1	1
