# Supplementary material for: Canonical WNT signaling-driven DKC1 dysregulates sphingolipid biosynthesis and drives colorectal cancer.
Source: Research Square preprint supplement (doi:10.21203/rs.3.rs-3180701/v1), 2023-12-04
Supplement: Supplementary file 6 [file c2c7cfbc2a86c133f76e3753.xlsx]

## Sheet: CMS_SIGNATURE_CLASSIFIER
Supplementary table 3: CMS gene signatures (up and down regulated genes) derived on the basis of associated pathways as reported in the original study (Guinney et. al, Nature, 2015).
CMS1_UP	CMS1_DOWN	CMS2_UP	CMS2_DOWN	CMS3_UP	CMS3_DOWN	CMS4_UP	CMS4_DOWN
LCP2	DSP	DSP	LCP2	DSP	LCP2	LCP2	DSP
LSP1	CKB	CKB	LSP1	CKB	LSP1	LSP1	CKB
FYB	CDH1	CDH1	FYB	CDH1	FYB	FYB	CDH1
PLEK	CLDN4	CLDN4	PLEK	CLDN4	PLEK	PLEK	CLDN4
HCK	ELF3	ELF3	HCK	ELF3	HCK	HCK	ELF3
IL10RA	KRT18	KRT18	IL10RA	KRT18	IL10RA	IL10RA	KRT18
LILRB1	KRT19	KRT19	LILRB1	KRT19	LILRB1	LILRB1	KRT19
NCKAP1L	TPD52	TPD52	NCKAP1L	TPD52	NCKAP1L	NCKAP1L	TPD52
LAIR1	ENTPD6	ENTPD6	LAIR1	ENTPD6	LAIR1	LAIR1	ENTPD6
NCF2	EPCAM	EPCAM	NCF2	EPCAM	NCF2	NCF2	EPCAM
CYBB	CEACAM1	CEACAM1	CYBB	CEACAM1	CYBB	CYBB	CEACAM1
PTPRC	ST14	ST14	PTPRC	ST14	PTPRC	PTPRC	ST14
IL7R	ERBB3	ERBB3	IL7R	ERBB3	IL7R	IL7R	ERBB3
LAPTM5	FXYD3	FXYD3	LAPTM5	FXYD3	LAPTM5	LAPTM5	FXYD3
CD53	VAMP8	VAMP8	CD53	VAMP8	CD53	CD53	VAMP8
EVI2B	CLDN7	CLDN7	EVI2B	CLDN7	EVI2B	EVI2B	CLDN7
SLA	SPINT1	SPINT1	SLA	SPINT1	SLA	SLA	SPINT1
ITGB2	GPX2	GPX2	ITGB2	GPX2	ITGB2	ITGB2	GPX2
GIMAP4	SOX9	SOX9	GIMAP4	SOX9	GIMAP4	GIMAP4	SOX9
MYO1F	SLPI	SLPI	MYO1F	SLPI	MYO1F	MYO1F	SLPI
HCLS1	GPRC5A	GPRC5A	HCLS1	GPRC5A	HCLS1	HCLS1	GPRC5A
MNDA	FCGBP	FCGBP	MNDA	FCGBP	MNDA	MNDA	FCGBP
IL2RG	SCNN1A	SCNN1A	IL2RG	SCNN1A	IL2RG	IL2RG	SCNN1A
CD48	MET	MET	CD48	MET	CD48	CD48	MET
AOAH	AOC1	AOC1	AOAH	AOC1	AOAH	AOAH	AOC1
CCL5	TSPAN8	TSPAN8	CCL5	TSPAN8	CCL5	CCL5	TSPAN8
LTB	IL2RG	IL2RG	LTB	IL2RG	LTB	LTB	IL2RG
GMFG	LGALS4	LGALS4	GMFG	LGALS4	GMFG	GMFG	LGALS4
GIMAP6	FGFR3	FGFR3	GIMAP6	FGFR3	GIMAP6	GIMAP6	FGFR3
GZMK	HMGCS2	HMGCS2	GZMK	HMGCS2	GZMK	GZMK	HMGCS2
LST1	TFF3	TFF3	LST1	TFF3	LST1	LST1	TFF3
GPR65	MYB	MYB	GPR65	MYB	GPR65	GPR65	MYB
LILRB2	TFF1	TFF1	LILRB2	TFF1	LILRB2	LILRB2	TFF1
WIPF1	USH1C	USH1C	WIPF1	USH1C	WIPF1	WIPF1	USH1C
CD37	CCL20	CCL20	CD37	CCL20	CD37	CD37	CCL20
BIN2	REG3B	REG3B	BIN2	REG3B	BIN2	BIN2	REG3B
FCER1G	HMGA1	HMGA1	FCER1G	HMGA1	FCER1G	FCER1G	HMGA1
IKZF1	SLC26A3	SLC26A3	IKZF1	SLC26A3	IKZF1	IKZF1	SLC26A3
TYROBP	SPINK1	SPINK1	TYROBP	SPINK1	TYROBP	TYROBP	SPINK1
FGL2	ADH1	ADH1	FGL2	ADH1	FGL2	FGL2	ADH1
FLI1	LEFTY2	LEFTY2	FLI1	LEFTY2	FLI1	FLI1	LEFTY2
IRF8	DMBT1	DMBT1	IRF8	DMBT1	IRF8	IRF8	DMBT1
ARHGAP15	ANXA13	ANXA13	ARHGAP15	ANXA13	ARHGAP15	ARHGAP15	ANXA13
SH2B3	PCK1	PCK1	SH2B3	PCK1	SH2B3	SH2B3	PCK1
TNFRSF1B	KRT8	KRT8	TNFRSF1B	KRT8	TNFRSF1B	TNFRSF1B	KRT8
DOCK2	TSPAN1	TSPAN1	DOCK2	TSPAN1	DOCK2	DOCK2	TSPAN1
CD2	AGR2	AGR2	CD2	AGR2	CD2	CD2	AGR2
ARHGEF6	KLF5	KLF5	ARHGEF6	KLF5	ARHGEF6	ARHGEF6	KLF5
CORO1A	AZGP1	AZGP1	CORO1A	AZGP1	CORO1A	CORO1A	AZGP1
LY96	REG1	REG1	LY96	REG1	LY96	LY96	REG1
LYZ	CDH17	CDH17	LYZ	CDH17	LYZ	LYZ	CDH17
ITGAL	SPINT2	SPINT2	ITGAL	SPINT2	ITGAL	ITGAL	SPINT2
TNFAIP3	SERPINA1C	SERPINA1C	TNFAIP3	SERPINA1C	TNFAIP3	TNFAIP3	SERPINA1C
RNASE6	LCN2	LCN2	RNASE6	LCN2	RNASE6	RNASE6	LCN2
TGFB1	OLFM4	OLFM4	TGFB1	OLFM4	TGFB1	TGFB1	OLFM4
PSTPIP1	MISP	MISP	PSTPIP1	MISP	PSTPIP1	PSTPIP1	MISP
CST7	TRY5	TRY5	CST7	TRY5	CST7	CST7	TRY5
RGS1	KRT20	KRT20	RGS1	KRT20	RGS1	RGS1	KRT20
FGR	CYP3A13	CYP3A13	FGR	CYP3A13	FGR	FGR	CYP3A13
SELL	CD24A	CD24A	SELL	CD24A	SELL	SELL	CD24A
MICAL1	RBM47	RBM47	MICAL1	RBM47	MICAL1	MICAL1	RBM47
TRAF3IP3	RAB25	RAB25	TRAF3IP3	RAB25	TRAF3IP3	TRAF3IP3	RAB25
ITGA4	S100A14	S100A14	ITGA4	S100A14	ITGA4	ITGA4	S100A14
MAFB	MUC13	MUC13	MAFB	MUC13	MAFB	MAFB	MUC13
ARHGDIB	RNF43	RNF43	ARHGDIB	RNF43	ARHGDIB	ARHGDIB	RNF43
IL4R	FERMT1	FERMT1	IL4R	FERMT1	IL4R	IL4R	FERMT1
RHOH	TMPRSS4	TMPRSS4	RHOH	TMPRSS4	RHOH	RHOH	TMPRSS4
HLA-DPA1	ESRP1	ESRP1	HLA-DPA1	ESRP1	HLA-DPA1	HLA-DPA1	ESRP1
NKG7	EPS8L3	EPS8L3	NKG7	EPS8L3	NKG7	NKG7	EPS8L3
NCF4	PDZK1IP1	PDZK1IP1	NCF4	PDZK1IP1	NCF4	NCF4	PDZK1IP1
LPXN	ACE2	ACE2	LPXN	ACE2	LPXN	LPXN	ACE2
ITK	EPB41L4B	EPB41L4B	ITK	EPB41L4B	ITK	ITK	EPB41L4B
SELPLG	ACSL5	ACSL5	SELPLG	ACSL5	SELPLG	SELPLG	ACSL5
HLA-DPB1	AXIN2	AXIN2	HLA-DPB1	AXIN2	HLA-DPB1	HLA-DPB1	AXIN2
CD3D	CGN	CGN	CD3D	CGN	CD3D	CD3D	CGN
CD300A	REG4	REG4	CD300A	REG4	CD300A	CD300A	REG4
IL2RB	AA467197	AA467197	IL2RB	AA467197	IL2RB	IL2RB	AA467197
ADCY7	ITLN1	ITLN1	ADCY7	ITLN1	ADCY7	ADCY7	ITLN1
PTGER4	MAL2	MAL2	PTGER4	MAL2	PTGER4	PTGER4	MAL2
SRGN	MGST1	MGST1	SRGN	MGST1	SRGN	SRGN	MGST1
CD247	PPP1R1B	PPP1R1B	CD247	PPP1R1B	CD247	CD247	PPP1R1B
CCR7	RAB11FIP1	RAB11FIP1	CCR7	RAB11FIP1	CCR7	CCR7	RAB11FIP1
MSN	FAM84A	FAM84A	MSN	FAM84A	MSN	MSN	FAM84A
ALOX5AP	FAM83H	FAM83H	ALOX5AP	FAM83H	ALOX5AP	ALOX5AP	FAM83H
PTGER2	PIGR	PIGR	PTGER2	PIGR	PTGER2	PTGER2	PIGR
RAC2	TMC4	TMC4	RAC2	TMC4	RAC2	RAC2	TMC4
GBP2	2610528A11RIK	2610528A11RIK	GBP2	2610528A11RIK	GBP2	GBP2	2610528A11RIK
VAV1	VIL1	VIL1	VAV1	VIL1	VAV1	VAV1	VIL1
CLEC2B	CAPN8	CAPN8	CLEC2B	CAPN8	CLEC2B	CLEC2B	CAPN8
P2RY14	CLRN3	CLRN3	P2RY14	CLRN3	P2RY14	P2RY14	CLRN3
NFKBIA	HNF4A	HNF4A	NFKBIA	HNF4A	NFKBIA	NFKBIA	HNF4A
S100A9	FABP1	FABP1	S100A9	FABP1	S100A9	S100A9	FABP1
IFI30	EHF	EHF	IFI30	EHF	IFI30	IFI30	EHF
MFSD1	ANKRD22	ANKRD22	MFSD1	ANKRD22	MFSD1	MFSD1	ANKRD22
RASSF2	SFN	SFN	RASSF2	SFN	RASSF2	RASSF2	SFN
TPP1	RUBCNL	RUBCNL	TPP1	RUBCNL	TPP1	TPP1	RUBCNL
RHOG	AIM1L	FOXQ1	RHOG	AIM1L	RHOG	RHOG	FOXQ1
CLEC4A	ABCB1	PHLDA1	CLEC4A	ABCB1	CLEC4A	CLEC4A	PHLDA1
GZMB	HMOX1	SLC7A5	GZMB	HMOX1	GZMB	GZMB	SLC7A5
PVRIG	SGK	FLJ20315	PVRIG	SGK	PVRIG	PVRIG	FLJ20315
S100A8	SHD1	CTPS	S100A8	SHD1	S100A8	S100A8	CTPS
CASP1	RAI3	BYSL	CASP1	RAI3	CASP1	CASP1	BYSL
BCL2A1	CDA	SCD	BCL2A1	CDA	BCL2A1	BCL2A1	SCD
HLA-E	ENPP1	PSF1	HLA-E	ENPP1	HLA-E	HLA-E	PSF1
KLRB1	MAD	NLE1	KLRB1	MAD	KLRB1	KLRB1	NLE1
GNLY	EGLN3	PPIL1	GNLY	EGLN3	GNLY	GNLY	PPIL1
RAB27A	RARRES3	RNU3IP2	RAB27A	RARRES3	RAB27A	RAB27A	RNU3IP2
IL18RAP	CXADR	HIG2	IL18RAP	CXADR	IL18RAP	IL18RAP	HIG2
TPST2	ABCG1	ZNF593	TPST2	ABCG1	TPST2	TPST2	ZNF593
EMP3	MXI1	C1orf33	EMP3	MXI1	EMP3	EMP3	C1orf33
GMIP	AREG	DKC1	GMIP	AREG	GMIP	GMIP	DKC1
LCK	ABCG2	ODC1	LCK	ABCG2	LCK	LCK	ODC1
IL32	PLAUR	LOC389362	IL32	PLAUR	IL32	IL32	LOC389362
PTPRCAP	GDA	HSPC111	PTPRCAP	GDA	PTPRCAP	PTPRCAP	HSPC111
LGALS9	PDGFA	AURKB	LGALS9	PDGFA	LGALS9	LGALS9	AURKB
CCDC69	AQP7	MGC40397	CCDC69	AQP7	CCDC69	CCDC69	MGC40397
SAMHD1	PAG	CDT1	SAMHD1	PAG	SAMHD1	SAMHD1	CDT1
TAP1	PTPRH	SDCCAG16	TAP1	PTPRH	TAP1	TAP1	SDCCAG16
GBP1	NK4	NOC3L	GBP1	NK4	GBP1	GBP1	NOC3L
CTSS	DHRS9	CAD	CTSS	DHRS9	CTSS	CTSS	CAD
GZMH	C18orf11	XPOT	GZMH	C18orf11	GZMH	GZMH	XPOT
ADAM8	DYRK2	FLJ10774	ADAM8	DYRK2	ADAM8	ADAM8	FLJ10774
GLRX	FLJ43855	YAP1	GLRX	FLJ43855	GLRX	GLRX	YAP1
PRF1	PKIB	SRM	PRF1	PKIB	PRF1	PRF1	SRM
CD69	KIAA1145	NXT1	CD69	KIAA1145	CD69	CD69	NXT1
HLA-B	ISG20	MRPS12	HLA-B	ISG20	HLA-B	HLA-B	MRPS12
HLA-DMA	HPGD	RAB9P40	HLA-DMA	HPGD	HLA-DMA	HLA-DMA	RAB9P40
CD74	F3	RHEB	CD74	F3	CD74	CD74	RHEB
KLRK1	TRIM31	WDR3	KLRK1	TRIM31	KLRK1	KLRK1	WDR3
PTPRE	COL17A1	RFP	PTPRE	COL17A1	PTPRE	PTPRE	RFP
HLA-DRA	DSCR1	CRTAP	HLA-DRA	DSCR1	HLA-DRA	HLA-DRA	CRTAP
VNN2	DST	SF3A2	VNN2	DST	VNN2	VNN2	SF3A2
TCIRG1	RHOF	GEMIN5	TCIRG1	RHOF	TCIRG1	TCIRG1	GEMIN5
RABGAP1L	EPHA2	RRP41	RABGAP1L	EPHA2	RABGAP1L	RABGAP1L	RRP41
CSTA	CLIC5	HNRPDL	CSTA	CLIC5	CSTA	CSTA	HNRPDL
ZAP70	CYP3A5	C16orf35	ZAP70	CYP3A5	ZAP70	ZAP70	C16orf35
HLA-F	TLR3	TREX2	HLA-F	TLR3	HLA-F	HLA-F	TREX2
HLA-G	PR1	CGI-96	HLA-G	PR1	HLA-G	HLA-G	CGI-96
CD52	SGK2	IMP4	CD52	SGK2	CD52	CD52	IMP4
CD302	PSG4	HEATR1	CD302	PSG4	CD302	CD302	HEATR1
CD27	MGLL	SLC19A1	CD27	MGLL	CD27	CD27	SLC19A1
ACTL6A	FLJ33915	C20orf64	DCN	FLJ33915	DCN	DCN	C20orf64
BAX	SLC9A3R1	C12orf14	PAPPA	SLC9A3R1	PAPPA	PAPPA	C12orf14
BCAT1	FBXO32	PDCD11	SFRP4	FBXO32	SFRP4	SFRP4	PDCD11
BIRC5	LOC255512	NOL1	THBS2	LOC255512	THBS2	THBS2	NOL1
BMI1	HIST1H1C	IL20RA	LY86	HIST1H1C	LY86	LY86	IL20RA
CAD	FLJ22761	ID3	CXCL14	FLJ22761	CXCL14	CXCL14	ID3
CCNB1	SLC2A1	SKB1	FOXF1	SLC2A1	FOXF1	FOXF1	SKB1
CCND2	ALDOB	C11orf5	COL10A1	ALDOB	COL10A1	COL10A1	C11orf5
CDC25A	BENE	FUT4	ACTG2	BENE	ACTG2	ACTG2	FUT4
CDCA7	LAMC2	PIGW	APBB1IP	LAMC2	APBB1IP	APBB1IP	PIGW
CDK4	HIST1H2AC	SRPRB	SH2D1A	HIST1H2AC	SH2D1A	SH2D1A	SRPRB
CREBBP	SLC20A2	ZNRD1	SULF1	SLC20A2	SULF1	SULF1	ZNRD1
DDX18	LRP4	TFB2M	MSR1	LRP4	MSR1	MSR1	TFB2M
E2F3	PLAC8	RPC62	C3AR1	PLAC8	C3AR1	C3AR1	RPC62
EIF2S1	PRSS23	JTV1	FAP	PRSS23	FAP	FAP	JTV1
EIF4A1	HIST1H2BD	ZNF339	PTGIS	HIST1H2BD	PTGIS	PTGIS	ZNF339
EIF4E	PEX26	EPHB3	ITGBL1	PEX26	ITGBL1	ITGBL1	EPHB3
EIF4G1	PARD6B	SOX4	BGN	PARD6B	BGN	BGN	SOX4
ENO1	PTPRD	WDR77	CXCL12	PTPRD	CXCL12	CXCL12	WDR77
EP300	FLJ38564	NOB1P	ECM2	FLJ38564	ECM2	ECM2	NOB1P
FOSL1	TEX11	PMSCL1	FCGR2A	TEX11	FCGR2A	FCGR2A	PMSCL1
GAPDH	CLDN3	CIRH1A	MS4A4A	CLDN3	MS4A4A	MS4A4A	CIRH1A
GPAM	MEP1A	ZNF511	WISP1	MEP1A	WISP1	WISP1	ZNF511
HMGA1	ATP1B3	WDR12	COL1A2	ATP1B3	COL1A2	COL1A2	WDR12
HSP90AA1	OSTbeta	LOC56902	MS4A6A	OSTbeta	MS4A6A	MS4A6A	LOC56902
HSPA4	SMPDL3A	ASCL2	EDNRA	SMPDL3A	EDNRA	EDNRA	ASCL2
HSPD1	VIL2	TDGF1	VCAM1	VIL2	VCAM1	VCAM1	TDGF1
HUWE1	EMP1	TBX3	GPR124	EMP1	GPR124	GPR124	TBX3
ID2	GZMA	ZNRF3	SCUBE2	GZMA	SCUBE2	SCUBE2	ZNRF3
IREB2	FLJ10901	RHOBTB3	AIF1	FLJ10901	AIF1	AIF1	RHOBTB3
KAT2A	EFNA1	GEMIN4	HEPH	EFNA1	HEPH	HEPH	GEMIN4
KAT5	GBP3	APEX1	LUM	GBP3	LUM	LUM	APEX1
KIR3DL1	TMPRSS2	MGC16824	PTGER3	TMPRSS2	PTGER3	PTGER3	MGC16824
LDHA	HIST1H4H	ZNF278	RUNX1T1	HIST1H4H	RUNX1T1	RUNX1T1	ZNF278
LIN28B	KIAA0931	APC	CDH5	KIAA0931	CDH5	CDH5	APEX
MAX	CA4	AXIN1	PIK3R5	CA4	PIK3R5	PIK3R5	CCNA2
MMP9	KIAA0063	BTRC	RAMP3	KIAA0063	RAMP3	RAMP3	CCND2
MTA1	PLCD1	CCND1	LDB2	PLCD1	LDB2	LDB2	CCNE1
MTDH	G1P2	CREBBP	COX7A1	G1P2	COX7A1	COX7A1	CDK4
MYC	C6orf170	CSNK2A1	EDIL3	C6orf170	EDIL3	EDIL3	CDKN1A
MYCT1	SLC6A19	CTBP1	DDR2	SLC6A19	DDR2	DDR2	CDKN2B
NBN	PPIE	CTNNB1	FCGR2B	PPIE	FCGR2B	FCGR2B	CHC1
NCL	RGS13	DVL1	LPPR4	RGS13	LPPR4	LPPR4	DDX18
NDUFAF2	CDH18	FRAT1	COL15A1	CDH18	COL15A1	COL15A1	DUSP1
NME1	LMO7	FZD1	AOC3	LMO7	AOC3	AOC3	EIF4E
NME2	ARHGEF18	GSK3B	ITIH3	ARHGEF18	ITIH3	ITIH3	ENO1
NPM1	DUSP5	HDAC1	FMO1	DUSP5	FMO1	FMO1	FASN
ODC1	TMEM24	HNF1A	PRKG1	TMEM24	PRKG1	PRKG1	FKBP4
PDCD10	RFK	MAP3K7	PLXDC1	RFK	PLXDC1	PLXDC1	FN1
PEG10	TBC1D1	MYC	VSIG4	TBC1D1	VSIG4	VSIG4	GADD45A
PFKM	FLJ20507	NLK	COL6A3	FLJ20507	COL6A3	COL6A3	HSPA4
PIM1	MMP14	PPARD	SGCD	MMP14	SGCD	SGCD	HSPCAL3
PMAIP1	BIRC3	PPP2CA	COL3A1	BIRC3	COL3A1	COL3A1	HSPD1
POLR3D	TINAG	SMAD4	F13A1	TINAG	F13A1	F13A1	HSPE1
PRDX3	PDXP	TAB1	OLFML1	PDXP	OLFML1	OLFML1	LDHA
PTMA	OAS1	TLE1	IGSF6	OAS1	IGSF6	IGSF6	MYC
RCC1	CDKN1A	WIF1	COMP	CDKN1A	COMP	COMP	NCL
RIOX2	DNAPTP6	WNT1	HGF	DNAPTP6	HGF	HGF	NME1
RPL11	UPP1	APEX	GIMAP5	UPP1	GIMAP5	GIMAP5	NME2
RUVBL1	PAPPA	CCNA2	ABCA6	PAPPA	ABCA6	ABCA6	NPM1
RUVBL2	FLJ14490	CCND2	ITGAM	FLJ14490	ITGAM	ITGAM	PPAT
SERPINI1	ROPN1L	CCNE1	MAF	ROPN1L	MAF	MAF	PTMA
SHMT1	GPA33	CDK4	ITM2A	GPA33	ITM2A	ITM2A	RPL23
SLC2A1	CYLN2	CDKN1A	CLEC7A	CYLN2	CLEC7A	CLEC7A	RPL3
SMAD3	FLJ14146	CDKN2B	ASPN	FLJ14146	ASPN	ASPN	RPL6
SMAD4	MGC14376	CHC1	LRRC15	MGC14376	LRRC15	LRRC15	RPS15A
SNAI1	F2RL1	DDX18	ERG	F2RL1	ERG	ERG	TERT
SUPT3H	SE57-1	DUSP1	CD86	SE57-1	CD86	CD86	TFRC
SUPT7L	PLOD2	EIF4E	TRAT1	PLOD2	TRAT1	TRAT1	THBS1
TAF10	P2RY2	ENO1	COL8A2	P2RY2	COL8A2	COL8A2	TNFSF6
TAF12	GDPD2	FASN	TCF21	GDPD2	TCF21	TCF21	TP53
TAF4B	RABEP1	FKBP4	CD93	RABEP1	CD93	CD93	TPM1
TAF9	SLC6A8	FN1	CD163	SLC6A8	CD163	CD163	ACTL6A
TERT	COPEB	GADD45A	GREM1	COPEB	GREM1	GREM1	BAX
TFRC	USP2	HSPA4	LMOD1	USP2	LMOD1	LMOD1	BCAT1
TK1	FLJ23129	HSPCAL3	TLR2	FLJ23129	TLR2	TLR2	BIRC5
TP53	SLC30A10	HSPD1	ZEB2	SLC30A10	ZEB2	ZEB2	BMI1
TRRAP	IL10RB	HSPE1	C1QB	IL10RB	C1QB	C1QB	CCNB1
UBTF	VDR	LDHA	KCNJ8	VDR	KCNJ8	KCNJ8	CDC25A
TGFB2	RIOK3	NCL	KDR	RIOK3	KDR	KDR	CDCA7
TGFB3	MME	NME1	CD33	MME	CD33	CD33	CREBBP
TGFBR1	IFNGR2	NME2	RASGRP3	IFNGR2	RASGRP3	RASGRP3	E2F3
TGFBR2	MGC50853	NPM1	TNFSF4	MGC50853	TNFSF4	TNFSF4	EIF2S1
SMAD2	EPSTI1	PPAT	CCR1	EPSTI1	CCR1	CCR1	EIF4A1
CSNK2A1	PDE1A	PTMA	CSF1R	PDE1A	CSF1R	CSF1R	EIF4G1
ELK1	SLC26A2	RPL23	BTK	SLC26A2	BTK	BTK	EP300
FOS	CYP3A7	RPL3	MFAP5	CYP3A7	MFAP5	MFAP5	FOSL1
GRB2	C21orf4	RPL6	MXRA5	C21orf4	MXRA5	MXRA5	GAPDH
HRAS	FLJ20152	RPS15A	ISLR	FLJ20152	ISLR	ISLR	GPAM
IL2	MGC13057	TERT	ARHGAP28	MGC13057	ARHGAP28	ARHGAP28	HSP90AA1
IL2RA	KMO	TFRC	ZFPM2	KMO	ZFPM2	ZFPM2	HUWE1
JAK1	KATNA1	THBS1	TLR7	KATNA1	TLR7	TLR7	ID2
JAK3	ALPI	TNFSF6	ADAM12	ALPI	ADAM12	ADAM12	IREB2
JUN	PTPRR	TP53	OLFML2B	PTPRR	OLFML2B	OLFML2B	KAT2A
MAP2K1	KIAA1211	TPM1	ENPP2	KIAA1211	ENPP2	ENPP2	KAT5
MAPK3	SLC3A1	ACTL6A	CILP	SLC3A1	CILP	CILP	KIR3DL1
MAPK8	HK2	BAX	SIGLEC1	HK2	SIGLEC1	SIGLEC1	LIN28B
RAF1	P4HA2	BCAT1	SPON2	P4HA2	SPON2	SPON2	MAX
SHC1	CIG5	BIRC5	PLXNC1	CIG5	PLXNC1	PLXNC1	MMP9
SOS1	BDKRB2	BMI1	ADAMTS5	BDKRB2	ADAMTS5	ADAMTS5	MTA1
STAT5A	EDN2	CCNB1	SAMSN1	EDN2	SAMSN1	SAMSN1	MTDH
STAT5B	ASAHL	CDC25A	CH25H	ASAHL	CH25H	CH25H	MYCT1
SYK	LBA1	CDCA7	COL14A1	LBA1	COL14A1	COL14A1	NBN
BLVRA	IGSF9	E2F3	EMCN	IGSF9	EMCN	EMCN	NDUFAF2
BLVRB	MAPK6	EIF2S1	RGS4	MAPK6	RGS4	RGS4	PDCD10
HMOX1	LOC339321	EIF4A1	PCDH12	LOC339321	PCDH12	PCDH12	PEG10
IL10	DKFZp547A023	EIF4G1	RARRES2	DKFZp547A023	RARRES2	RARRES2	PFKM
IL10RB	FLJ35954	EP300	CD248	FLJ35954	CD248	CD248	PIM1
IL1A	CLCN2	FOSL1	PDGFRB	CLCN2	PDGFRB	PDGFRB	PMAIP1
IL6	PSG1	GAPDH	C1QA	PSG1	C1QA	C1QA	POLR3D
STAT1	SLC36A1	GPAM	COL5A3	SLC36A1	COL5A3	COL5A3	PRDX3
STAT3	ZNF219	HSP90AA1	IGF1	ZNF219	IGF1	IGF1	RCC1
TNF	MGC11324	HUWE1	SP140	MGC11324	SP140	SP140	RIOX2
APAF1	RECQL5	ID2	TFEC	RECQL5	TFEC	TFEC	RPL11
BIRC2	LOC222171	IREB2	TNN	LOC222171	TNN	TNN	RUVBL1
BIRC3	PDE9A	KAT2A	ATP8B4	PDE9A	ATP8B4	ATP8B4	RUVBL2
CASP10	KIAA1363	KAT5	ZNF423	KIAA1363	ZNF423	ZNF423	SERPINI1
CASP2	DKFZP564O123	KIR3DL1	FRZB	DKFZP564O123	FRZB	FRZB	SHMT1
CASP3	EPS8	LIN28B	SERPING1	EPS8	SERPING1	SERPING1	SLC2A1
CASP4	VIPR1	MAX	ENPEP	VIPR1	ENPEP	ENPEP	SMAD3
CASP6	STX3A	MMP9	CD14	STX3A	CD14	CD14	SMAD4
CASP7	LAMA1	MTA1	DIO2	LAMA1	DIO2	DIO2	SNAI1
CASP8	DPP3	MTDH	FPR1	DPP3	FPR1	FPR1	SUPT3H
CASP9	DIRC2	MYCT1	IL18R1	DIRC2	IL18R1	IL18R1	SUPT7L
DFFA	HIST1H2BC	NBN	HDC	HIST1H2BC	HDC	HDC	TAF10
DFFB	ACOX1	NDUFAF2	TXNDC3	ACOX1	TXNDC3	TXNDC3	TAF12
LMNA	SGPP2	PDCD10	PDE2A	SGPP2	PDE2A	PDE2A	TAF4B
LMNB1	BCLP	PEG10	RSAD2	BCLP	RSAD2	RSAD2	TAF9
LMNB2	AMACR	PFKM	ITIH5	AMACR	ITIH5	ITIH5	TK1
PARP1	BCL10	PIM1	FASLG	BCL10	FASLG	FASLG	TRRAP
XIAP	RHOC	PMAIP1	MMP3	RHOC	MMP3	MMP3	UBTF
PSMD3	SLC9A1	POLR3D	NOX4	SLC9A1	NOX4	NOX4	PCDH7
PSMD9	RPL21	PRDX3	WNT2	RPL21	WNT2	WNT2	TRAP1
PSMD12	FLJ31842	RCC1	LRRC32	FLJ31842	LRRC32	LRRC32	ALDH1B1
PSMD11	ALOX5	RIOX2	CXCL9	ALOX5	CXCL9	CXCL9	LOC285705
PSMD6	MGC24039	RPL11	ODZ4	MGC24039	ODZ4	ODZ4	SYNCRIP
PSMD7	PPM1A	RUVBL1	FBLN2	PPM1A	FBLN2	FBLN2	CENPF
PSMD13	ACHE	RUVBL2	EGFL6	ACHE	EGFL6	EGFL6	NUSAP1
PSMD14	GCNT3	SERPINI1	IL1B	GCNT3	IL1B	IL1B	PTTG1
PSMD8	MAPK3	SHMT1	SPON1	MAPK3	SPON1	SPON1	SMARCA4
SEM1	AKR1B10	SLC2A1	CD200	AKR1B10	CD200	CD200	SYNPO2
PSMD4	LHFPL2	SMAD3	PRR16	LHFPL2	PRR16	CDH11	LEFTB
PSMD2	GGA2	SNAI1	MAPK10	GGA2	MAPK10	CDH2	UBE2C
PSMD1	ANPEP	SUPT3H	MATN3	ANPEP	MATN3	VIM	MYO9A
ADRM1	EDN3	SUPT7L	MCC	EDN3	MCC	MMP2	GREM1
PSMC2	LRRC19	TAF10	GRP	LRRC19	GRP	ZEB1	ACY1L2
PSMC1	SLC17A4	TAF12	NKX3-2	SLC17A4	NKX3-2	SNAI1	CAP2
PSMC5	UGCG	TAF4B	CYP7B1	UGCG	CYP7B1	SNAI2	MTL5
PSMC6	PRDX6	TAF9	CHRDL1	PRDX6	CHRDL1	TWIST1	FBN1
PSMC3	APOBEC3B	TK1	KCNMB1	APOBEC3B	KCNMB1	TWIST2	EBPL
PSMC4	CTDSP2	TRRAP	PCDH7	CTDSP2	PCDH7	FOXC1	CDC25C
PSME1	TNFSF10	UBTF	PLPPR4	TNFSF10	PLPPR4	TGFB2	KIAA1324
PSME2	FHL2	PCDH7	TRPC6	FHL2	TRPC6	TGFB3	SLC12A2
PSME3	ADM	TRAP1	TMEM100	ADM	TMEM100	TGFBR1	Pfs2
PSME4	DPH2L1	ALDH1B1	RGMA	DPH2L1	RGMA	TGFBR2	KCNN4
PSMA6	ASS	LOC285705	LRCH2	ASS	LRCH2	SMAD2	DKFZp762E1312
PSMA2	CARD9	SYNCRIP	RERG	CARD9	RERG	SMAD3	DNMT2
PSMA4	MGAT4A	CENPF	SCN7A	MGAT4A	SCN7A	SMAD4	CDKN3
PSMA7	CTSE	NUSAP1	BHLHE22	CTSE	BHLHE22	A2M	DEPDC6
PSMA8	SLC1A1	PTTG1	SDK1	SLC1A1	SDK1	ACAN	GMNN
PSMA5	DEFB1	SMARCA4	PABPC4L	DEFB1	PABPC4L	ACTN1	SMOC2
PSMA1	SYTL5	SYNPO2	CHSY3	SYTL5	CHSY3	ADAM10	LDHB
PSMA3	BAPX1	LEFTB	KCNT2	BAPX1	KCNT2	ADAM15	CDCA5
PSMB6	HIST1H3H	UBE2C	CDH11	HIST1H3H	CDH11	ADAM17	ATBF1
PSMB7	SERPINA12	MYO9A	CDH2	SERPINA12	CDH2	ADAM19	PGAP1
PSMB3	FAM46A	GREM1	VIM	FAM46A	VIM	ADAM9	CDK6
PSMB2	IL28RA	ACY1L2	MMP2	IL28RA	MMP2	ADAMTS1	BRIX
PSMB5	SAT	CAP2	ZEB1	SAT	ZEB1	ADAMTS14	RAMP
PSMB1	ARSA	MTL5	SNAI1	ARSA	SNAI1	ADAMTS16	LOC339316
PSMB4	MFI2	FBN1	SNAI2	MFI2	SNAI2	ADAMTS18	RRM2
PSMB9	UGP2	EBPL	TWIST1	UGP2	TWIST1	ADAMTS2	RAD51
PSMB10	PRSS3	CDC25C	TWIST2	PRSS3	TWIST2	ADAMTS3	LRIG1
PSMB8	DSC2	KIAA1324	FOXC1	DSC2	FOXC1	ADAMTS4	FARSLB
PSMB11	PRKCD	SLC12A2	TGFB2	PRKCD	TGFB2	ADAMTS8	GREM2
IFNG	UACA	Pfs2	TGFB3	UACA	TGFB3	ADAMTS9	DLG7
PSMF1	SOX17	KCNN4	TGFBR1	SOX17	TGFBR1	AGRN	CHEK1
POMP	SMAD3	DKFZp762E1312	TGFBR2	SMAD3	TGFBR2	APP	SYTL2
AAAS	LPIN2	DNMT2	SMAD2	LPIN2	SMAD2	BCAN	SMTN
ABL1	REV1L	CDKN3	SMAD3	REV1L	SMAD3	BMP1	OGN
ABRAXAS1	NGFB	DEPDC6	SMAD4	NGFB	SMAD4	BMP10	LOC151878
ACD	BMP2	GMNN	A2M	BMP2	A2M	BMP2	RPS19
ACTR1A	FLJ10665	SMOC2	ACAN	FLJ10665	ACAN	BMP4	CHRDL1
AHCTF1	KCNK1	LDHB	ACTN1	KCNK1	ACTN1	BMP7	CENPE
AJUBA	GK	CDCA5	ADAM10	GK	ADAM10	BSG	EPHB2
AKAP9	ARHE	ATBF1	ADAM15	ARHE	ADAM15	CAPN1	EXOSC5
AKT1	RNF103	PGAP1	ADAM17	RNF103	ADAM17	CAPN10	CCNB2
AKT2	ISGF3G	CDK6	ADAM19	ISGF3G	ADAM19	CAPN11	RPS3
AKT3	FLJ40432	BRIX	ADAM9	FLJ40432	ADAM9	CAPN12	TTK
ALMS1	GNG12	RAMP	ADAMTS1	GNG12	ADAMTS1	CAPN13	IQGAP3
ANAPC1	DEDD2	LOC339316	ADAMTS14	DEDD2	ADAMTS14	CAPN14	FYN
ANAPC10	TNFAIP8	RRM2	ADAMTS16	TNFAIP8	ADAMTS16	CAPN15	GAB1
ANAPC11	MAP1B	RAD51	ADAMTS18	MAP1B	ADAMTS18	CAPN2	TOPK
ANAPC15	PTPN18	LRIG1	ADAMTS2	PTPN18	ADAMTS2	CAPN3	CDC20
ANAPC16	CIT	FARSLB	ADAMTS3	CIT	ADAMTS3	CAPN5	IL17RB
ANAPC2	ALDOC	GREM2	ADAMTS4	ALDOC	ADAMTS4	CAPN6	PLCB4
ANAPC4	MSP	DLG7	ADAMTS8	MSP	ADAMTS8	CAPN7	RFC3
ANAPC5	THBS1	CHEK1	ADAMTS9	THBS1	ADAMTS9	CAPN8	FLRT2
ANAPC7	HN1	SYTL2	AGRN	HN1	AGRN	CAPN9	RPL10A
ANKLE2	NPY	SMTN	APP	NPY	APP	CAPNS1	TIMP3
ANKRD28	CHP	OGN	BCAN	CHP	BCAN	CAPNS2	CDCA1
ARPP19	SLC25A23	LOC151878	BMP1	SLC25A23	BMP1	CASK	KIF14
ATM	BIRC4	RPS19	BMP10	BIRC4	BMP10	CASP3	CNN1
ATR	DIO3	CHRDL1	BMP2	DIO3	BMP2	CAST	HPS3
ATRIP	PADI2	CENPE	BMP4	PADI2	BMP4	CD151	WBSCR14
ATRX	HS6ST1	EPHB2	BMP7	HS6ST1	BMP7	CD44	MUC5B
AURKA	PRSS12	EXOSC5	BSG	PRSS12	BSG	CD47	TIGA1
AURKB	SLC40A1	CCNB2	CAPN1	SLC40A1	CAPN1	CDH1	EEF1G
B9D2	TRPV3	RPS3	CAPN10	TRPV3	CAPN10	CEACAM1	HSPC049
BABAM1	ELF4	TTK	CAPN11	ELF4	CAPN11	CEACAM6	TAGLN
BABAM2	NT5C3	IQGAP3	CAPN12	NT5C3	CAPN12	CEACAM8	CDC2
BANF1	SEC23A	FYN	CAPN13	SEC23A	CAPN13	CMA1	NGFRAP1
BARD1	CCNG2	GAB1	CAPN14	CCNG2	CAPN14	COL11A1	SULF1
BLM	LAMB3	TOPK	CAPN15	LAMB3	CAPN15	COL11A2	PTPRO
BLZF1	SARG	CDC20	CAPN2	SARG	CAPN2	COL12A1	MYL9
BORA	POLD4	IL17RB	CAPN3	POLD4	CAPN3	COL13A1	ITGB3BP
BRCA1	PLEKHA7	PLCB4	CAPN5	PLEKHA7	CAPN5	COL16A1	RFC4
BRCA2	GENX-3414	RFC3	CAPN6	GENX-3414	CAPN6	COL17A1	RGMA
BRCC3	SDCBP2	FLRT2	CAPN7	SDCBP2	CAPN7	COL18A1	FRAS1
BRIP1	GBAP	RPL10A	CAPN8	GBAP	CAPN8	COL19A1	RPS27
BTRC	AAK1	TIMP3	CAPN9	AAK1	CAPN9	COL1A1	VPS41
BUB1	TST	CDCA1	CAPNS1	TST	CAPNS1	COL20A1	CACNA2D2
BUB1B	PSG11	KIF14	CAPNS2	PSG11	CAPNS2	COL21A1	RPL12
BUB3	PI3	CNN1	CASK	PI3	CASK	COL22A1	EEF1A1
CABLES1	TAX1BP3	HPS3	CASP3	TAX1BP3	CASP3	COL23A1	MAL
CC2D1B	TMPIT	WBSCR14	CAST	TMPIT	CAST	COL24A1	IARS
CCNA1	TRIM5	MUC5B	CD151	TRIM5	CD151	COL25A1	LOC283345
CCNA2	GTF2H5	TIGA1	CD44	GTF2H5	CD44	COL26A1	MELK
CCNB2	FLJ25084	EEF1G	CD47	FLJ25084	CD47	COL27A1	ATP11A
CCND1	TESK2	HSPC049	CDH1	TESK2	CDH1	COL28A1	PYCR1
CCND3	PLA2G7	TAGLN	CEACAM1	PLA2G7	CEACAM1	COL2A1	GCG
CCNE1	GGTL4	CDC2	CEACAM6	GGTL4	CEACAM6	COL4A1	ARHGAP8
CCNE2	SP1	NGFRAP1	CEACAM8	SP1	CEACAM8	COL4A2	RPL7A
CCNH	ZC3HDC1	SULF1	CMA1	ZC3HDC1	CMA1	COL4A3	NEK2
CCP110	TJP3	PTPRO	COL11A1	TJP3	COL11A1	COL4A4	SERPINA3
CDC14A	PDZK2	MYL9	COL11A2	PDZK2	COL11A2	COL4A5	FLJ10156
CDC16	HIG1	ITGB3BP	COL12A1	HIG1	COL12A1	COL4A6	KIF5C
CDC20	SRI	RFC4	COL13A1	SRI	COL13A1	COL5A1	MGC26690
CDC23	HDAC9	RGMA	COL16A1	HDAC9	COL16A1	COL5A2	TOP2A
CDC25B	JUND	FRAS1	COL17A1	JUND	COL17A1	COL6A1	TRIP6
CDC25C	SLC25A25	RPS27	COL18A1	SLC25A25	COL18A1	COL6A2	CENPA
CDC26	LOC129607	VPS41	COL19A1	LOC129607	COL19A1	COL6A5	MAGEF1
CDC27	DAPK2	CACNA2D2	COL1A1	DAPK2	COL1A1	COL6A6	RPL5
CDC45	RGS19IP1	RPL12	COL20A1	RGS19IP1	COL20A1	COL7A1	TFCP2
CDC6	LARGE	EEF1A1	COL21A1	LARGE	COL21A1	COL8A1	ARID5B
CDC7	SIRT6	MAL	COL22A1	SIRT6	COL22A1	COL9A1	BEX2
CDCA5	DOCK5	IARS	COL23A1	DOCK5	COL23A1	COL9A2	LOC219347
CDCA8	APXL2	LOC283345	COL24A1	APXL2	COL24A1	COL9A3	OXCT1
CDK1	PPGB	MELK	COL25A1	PPGB	COL25A1	COLGALT1	MYST3
CDK11A	BCAS1	ATP11A	COL26A1	BCAS1	COL26A1	COLGALT2	ZNF10
CDK11B	TRIF	PYCR1	COL27A1	TRIF	COL27A1	CRTAP	CNTNAP2
CDK2	RHPN2	GCG	COL28A1	RHPN2	COL28A1	CTRB1	PCOLN3
CDK5RAP2	CHMP1.5	ARHGAP8	COL2A1	CHMP1.5	COL2A1	CTRB2	RPL31
CDK6	GPR115	RPL7A	COL4A1	GPR115	COL4A1	CTSB	RPS5
CDK7	PRAP1	NEK2	COL4A2	PRAP1	COL4A2	CTSD	RASGEF1C
CDKN1A	VILL	SERPINA3	COL4A3	VILL	COL4A3	CTSG	FLJ23441
CDKN1B	SLC22A5	FLJ10156	COL4A4	SLC22A5	COL4A4	CTSK	MRPL3
CDKN1C	KIAA0376	KIF5C	COL4A5	KIAA0376	COL4A5	CTSL	SFRP1
CDKN2A	OKL38	MGC26690	COL4A6	OKL38	COL4A6	CTSV	ANGPTL1
CDKN2B	MICAL2	TOP2A	COL5A1	MICAL2	COL5A1	DAG1	MTHFD1
CDKN2C	KIAA1613	TRIP6	COL5A2	KIAA1613	COL5A2	DDR1	TCF19
CDKN2D	NEDD9	CENPA	COL6A1	NEDD9	COL6A1	DMD	FLJ20294
CDT1	CNGA1	MAGEF1	COL6A2	CNGA1	COL6A2	DMP1	B4GALT2
CENPA	GSDML	RPL5	COL6A5	GSDML	COL6A5	DSPP	WFDC2
CENPC	SLC9A2	TFCP2	COL6A6	SLC9A2	COL6A6	DST	RPL21
CENPE	MYLK	ARID5B	COL7A1	MYLK	COL7A1	EFEMP1	MLPH
CENPF	LITAF	BEX2	COL8A1	LITAF	COL8A1	EFEMP2	TPX2
CENPH	KIAA1539	LOC219347	COL9A1	KIAA1539	COL9A1	ELANE	ZNF185
CENPI	OSTM1	OXCT1	COL9A2	OSTM1	COL9A2	ELN	PAICS
CENPJ	HSD17B2	MYST3	COL9A3	HSD17B2	COL9A3	EMILIN1	KIF4A
CENPK	DKFZp761D221	ZNF10	COLGALT1	DKFZp761D221	COLGALT1	EMILIN2	FEN1
CENPL	OCLN	CNTNAP2	COLGALT2	OCLN	COLGALT2	EMILIN3	NOL5A
CENPM	GGT2	PCOLN3	CRTAP	GGT2	CRTAP	F11R	OGDH
CENPN	LIPH	RPL31	CTRB1	LIPH	CTRB1	FBLN1	FMOD
CENPO	ATP6V0D1	RPS5	CTRB2	ATP6V0D1	CTRB2	FBLN5	MTB
CENPP	OR7E47P	RASGEF1C	CTSB	OR7E47P	CTSB	FBN1	PGM5
CENPQ	TP53INP1	FLJ23441	CTSD	TP53INP1	CTSD	FBN2	GNB2L1
CENPS	IGSF3	MRPL3	CTSG	IGSF3	CTSG	FBN3	DEPDC1
CENPT	AMFR	SFRP1	CTSK	AMFR	CTSK	FGA	LAMR1
CENPU	RNF152	ANGPTL1	CTSL	RNF152	CTSL	FGB	CFHL1
CENPW	GNA11	MTHFD1	CTSV	GNA11	CTSV	FGF2	PRRX1
CENPX	GUCA2A	TCF19	DAG1	GUCA2A	DAG1	FGG	LSM8
CEP131	FLJ37131	FLJ20294	DDR1	FLJ37131	DDR1	ABAT	PAFAH1B3
CEP135	RHOG	B4GALT2	DMD	RHOG	DMD	ACTB	KCNMB1
CEP152	TCN2	WFDC2	DMP1	TCN2	DMP1	ACTG1	UGT1A6
CEP164	XRN1	RPL21	DSPP	XRN1	DSPP	ACVRL1	NS
CEP192	FMO5	MLPH	DST	FMO5	DST	ADAMTS13	RERG
CEP250	YPEL1	TPX2	EFEMP1	YPEL1	EFEMP1	ADIPOR2	NHS
CEP290	TP53INP2	ZNF185	EFEMP2	TP53INP2	EFEMP2	ADORA2A	RPS9
CEP41	PAX8	PAICS	ELANE	PAX8	ELANE	ADRA2A	SSX2IP
CEP43	NDFIP2	KIF4A	ELN	NDFIP2	ELN	ADRA2B	SLC39A8
CEP57	AMID	FEN1	EMILIN1	AMID	EMILIN1	ADRA2C	SH3BP4
CEP63	IVNS1ABP	NOL5A	EMILIN2	IVNS1ABP	EMILIN2	ADTRP	COL12A1
CEP70	TM4SF8	OGDH	EMILIN3	TM4SF8	EMILIN3	AGER	MCM6
CEP72	SRPRB	FMOD	F11R	SRPRB	F11R	AJAP1	ZNF367
CEP76	COBL	MTB	FBLN1	COBL	FBLN1	AJUBA	FHOD3
CEP78	PLXNA2	PGM5	FBLN5	PLXNA2	FBLN5	AK3	FLJ13220
CETN2	SEMA6D	GNB2L1	FBN1	SEMA6D	FBN1	AKAP1	FOXM1
CHEK1	SGCD	DEPDC1	FBN2	SGCD	FBN2	AKAP10	BEX1
CHEK2	ABHD5	LAMR1	FBN3	ABHD5	FBN3	ALOX12	RAD54B
CHMP2A	PHC3	CFHL1	FGA	PHC3	FGA	ALOX15	EPHB4
CHMP2B	CLDN23	PRRX1	FGB	CLDN23	FGB	ALOX5	MAD2L1
CHMP3	FLJ13456	LSM8	FGF2	FLJ13456	FGF2	ANO6	RPL35
CHMP4A	MEN1	PAFAH1B3	FGG	MEN1	FGG	ANXA1	NOLA2
CHMP4B	ARL4A	KCNMB1	ABAT	ARL4A	ABAT	ANXA2	||
CHMP4C	TNFRSF21	UGT1A6	ACTB	TNFRSF21	ACTB	ANXA5	RCN1
CHMP6	DDX58	NS	ACTG1	DDX58	ACTG1	ANXA6	TCEAL4
CHMP7	SMPD1	RERG	ACVRL1	SMPD1	ACVRL1	ANXA8	ARGBP2
CHTF18	MAP1LC3B	NHS	ADAMTS13	MAP1LC3B	ADAMTS13	AP3B1	ANAPC1
CHTF8	VEGF	RPS9	ADIPOR2	VEGF	ADIPOR2	APCS	CDCA3
CKAP5	MGC72075	SSX2IP	ADORA2A	MGC72075	ADORA2A	APOE	SIAT7B
CKS1B	B2M	SLC39A8	ADRA2A	B2M	ADRA2A	APOH	MRPL24
CLASP1	SPRED2	SH3BP4	ADRA2B	SPRED2	ADRA2B	ARFGEF1	PEMT
CLASP2	CCL23	COL12A1	ADRA2C	CCL23	ADRA2C	ARHGAP24	RPS14
CLIP1	ATF3	MCM6	ADTRP	ATF3	ADTRP	ARHGAP35	ZNF84
CLSPN	TDE2L	ZNF367	AGER	TDE2L	AGER	ARHGEF19	FLJ14525
CNEP1R1	MAP2K5	FHOD3	AJAP1	MAP2K5	AJAP1	ARRB1	FLJ23311
CNTRL	SFTPB	FLJ13220	AJUBA	SFTPB	AJUBA	ARRB2	KIAA1155
COP1	VASP	FOXM1	AK3	VASP	AK3	AXL	LBR
CSNK1D	TCF7L2	BEX1	AKAP1	TCF7L2	AKAP1	B4GALT1	KIAA0114
CSNK1E	FOSL2	RAD54B	AKAP10	FOSL2	AKAP10	BLK	ACPL2
CSNK2A2	JUNB	EPHB4	ALOX12	JUNB	ALOX12	BLOC1S3	MRPS2
CSNK2B	FGL1	MAD2L1	ALOX15	FGL1	ALOX15	BLOC1S4	SPRY1
CTC1	C4A	RPL35	ALOX5	C4A	ALOX5	C1GALT1C1	ADAMTS1
CTDNEP1	LTK	NOLA2	ANO6	LTK	ANO6	C1QBP	CLU
CUL1	TPK1	||	ANXA1	TPK1	ANXA1	C1QTNF1	EXO1
DAXX	KIAA0830	RCN1	ANXA2	KIAA0830	ANXA2	C4BPB	HUNK
DBF4	CA12	TCEAL4	ANXA5	CA12	ANXA5	C6orf89	EBAF
DCTN1	TNKS2	ARGBP2	ANXA6	TNKS2	ANXA6	CADM4	PLK1
DCTN2	MKRN1	ANAPC1	ANXA8	MKRN1	ANXA8	CAPZA1	GPC4
DCTN3	PLEKHF2	CDCA3	AP3B1	PLEKHF2	AP3B1	CAPZA2	NAV3
DHFR	ABTB2	SIAT7B	APCS	APAF1	APCS	CAPZB	MGC14560
DIDO1	AFAP1L1	MRPL24	APOE	ARHGDIB	APOE	CARMIL1	RANBP5
DKC1	APCDD1	PEMT	APOH	BIRC2	APOH	CARMIL2	POLR1C
DMC1	ARHGEF4	RPS14	ARFGEF1	CASP1	ARFGEF1	CAV1	PTPN21
DNA2	ARNT2	ZNF84	ARHGAP24	CASP10	ARHGAP24	CAV3	PRELP
DSCC1	BCL2	FLJ14525	ARHGAP35	CASP2	ARHGAP35	CBX5	IMPDH2
DSN1	BEX1	FLJ23311	ARHGEF19	CASP3	ARHGEF19	CCM2L	SFXN4
DYNC1H1	BEX2	KIAA1155	ARRB1	CASP4	ARRB1	CCN1	MLF1IP
DYNC1I1	CAP2	LBR	ARRB2	CASP6	ARRB2	CCN4	ADH1B
DYNC1I2	CCDC46	KIAA0114	AXL	CASP7	AXL	CD109	MGC24665
DYNC1LI1	CYP2E1	ACPL2	B4GALT1	CASP8	B4GALT1	CD177	DDX20
DYNC1LI2	DGKG	MRPS2	BLK	CASP9	BLK	CD34	POLE2
DYNLL1	DLGAP1	SPRY1	BLOC1S3	DFFA	BLOC1S3	CD36	LOC388974
DYNLL2	DTL	ADAMTS1	BLOC1S4	DFFB	BLOC1S4	CD40	COG4
DYRK1A	DYNC2H1	CLU	C1GALT1C1	GZMB	C1GALT1C1	CD40LG	RODH
E2F1	EPHA4	EXO1	C1QBP	LMNA	C1QBP	CD59	AMT
E2F2	FAM64A	HUNK	C1QTNF1	LMNB1	C1QTNF1	CD9	MGC13170
E2F4	FGFR4	EBAF	C4BPB	LMNB2	C4BPB	CDC42	MKI67
E2F5	FMNL2	PLK1	C6orf89	PARP1	C6orf89	CDH3	IFRD2
E2F6	FSTL1	GPC4	CADM4	PRF1	CADM4	CELA2A	TLE2
EMD	GRAMD1A	NAV3	CAPZA1	XIAP	CAPZA1	CELSR1	NR2C2
EML4	GRK4	MGC14560	CAPZA2	ADAM10	CAPZA2	CFLAR	SLC38A5
ENSA	IGF1R	RANBP5	CAPZB	ADAM17	CAPZB	CLASP1	ATOH8
ERCC6L	IGFBP4	POLR1C	CARMIL1	APH1A	CARMIL1	CLASP2	HTLF
ESCO1	IL17RD	PTPN21	CARMIL2	APH1B	CARMIL2	CLDN1	FLJ40629
ESCO2	KIF12	PRELP	CAV1	ARRB1	CAV1	CLDN19	SIM2
ESPL1	KIF26B	IMPDH2	CAV3	ARRB2	CAV3	CLDN3	EEF1E1
EXO1	KLHL13	SFXN4	CBX5	CNTN1	CBX5	CLDN4	SCML2
FBXL18	LDHB	MLF1IP	CCM2L	DLK1	CCM2L	CLEC1B	SEC8L1
FBXL7	LGR5	ADH1B	CCN1	DLL1	CCN1	CLIC1	CGI-63
FBXO5	LIFR	MGC24665	CCN4	DLL4	CCN4	CORO1B	CGI-30
FBXW11	LOC285141	DDX20	CD109	DNER	CD109	CPB2	FLJ22318
FEN1	MDFIC	POLE2	CD177	DTX1	CD177	CRK	NUP35
FKBP6	MPP3	LOC388974	CD34	DTX2	CD34	CSRP1	TUFT1
FKBPL	NPNT	COG4	CD36	DTX4	CD36	CX3CL1	MGC57827
FOXM1	PITPNC1	RODH	CD40	ITCH	CD40	CXCR4	HH114
FZR1	PLP1	AMT	CD40LG	JAG1	CD40LG	CYP4F11	ALG8
GAR1	RASSF4	MGC13170	CD59	JAG2	CD59	CYP4F2	TYMS
GINS1	RNF157	MKI67	CD9	MIB1	CD9	DCBLD2	RPS8
GINS2	SCN2B	IFRD2	CDC42	MIB2	CDC42	DGKA	ZWINT
GINS3	2006-09-01	TLE2	CDH3	NCSTN	CDH3	DGKB	NEXN
GINS4	SERTAD4	NR2C2	CELA2A	NEURL1	CELA2A	DGKD	DKFZp762K222
GMNN	SLC1A2	SLC38A5	CELSR1	NEURL1B	CELSR1	DGKE	KIAA1893
GOLGA2	SLC38A4	ATOH8	CFLAR	NOTCH1	CFLAR	DGKG	CDC7
GORASP1	SLCO3A1	HTLF	CLASP1	NUMB	CLASP1	DGKH	ZCWCC2
GORASP2	SLIT2	FLJ40629	CLASP2	PSEN1	CLASP2	DGKI	MYBL2
GSK3B	SOAT1	SIM2	CLDN1	PSEN2	CLDN1	DGKK	MTR
GTSE1	SORBS2	EEF1E1	CLDN19	PSENEN	CLDN19	DGKQ	RPS6
H2AB1	SOX4	SCML2	CLDN3	RPS27A	CLDN3	DGKZ	ATIC
H2AC14	TACC1	SEC8L1	CLDN4	UBA52	CLDN4	DMTN	MRPL1
H2AC18	TMEM182	CGI-63	CLEC1B	UBB	CLEC1B	DOCK1	POLS
H2AC19	TNFRSF19	CGI-30	CLIC1	UBC	CLIC1	DOCK11	MGC3036
H2AC20	UTRN	FLJ22318	CORO1B	TLR7	CORO1B	DOCK6	LOC283596
H2AC4	ZNF141	NUP35	CPB2	IFIT3	CPB2	DOCK8	BST1
H2AC6	ZNF273	TUFT1	CRK	DAPL1	CRK	DOCK9	TP53I11
H2AC7	ZNF493	MGC57827	CSRP1	TMEM98	CSRP1	DRD5	GYG2
H2AC8	ZNF626	HH114	CX3CL1	EGFR	CX3CL1	DSP	Prostein
H2AJ	ZNF678	ALG8	CXCR4	IGHA	CXCR4	DTNBP1	STK33
H2AX	ZNF680	TYMS	CYP4F11	ANO7	CYP4F11	DUOX1	PKMYT1
H2AZ1	ZNF714	RPS8	CYP4F2	IGHG3	CYP4F2	DUOX2	DDX28
H2AZ2	ZNF85	ZWINT	DCBLD2	CTLA2A	DCBLD2	DUSP10	MCM3
H2BC1	ZNF92	NEXN	DGKA	CPA3	DGKA	DYSF	CDC6
H2BC10	ZNF93	DKFZp762K222	DGKB	ODC1	DGKB	EDN1	UBA52
H2BC11	ASRGL1	KIAA1893	DGKD	IL1RL1	DGKD	EGFR	TARBP1
H2BC12	CD44	CDC7	DGKE	KLRG1	DGKE	EHD1	DMD
H2BC13	CENPF	ZCWCC2	DGKG	CCR1	DGKG	EHD2	ALDH1A1
H2BC14	EPHB3	MYBL2	DGKH	PCSK1	DGKH	EHD3	LOC91942
H2BC15	PRELP	MTR	DGKI	MCPT1	DGKI	ELK3	CDC25B
H2BC17	PSRC1	RPS6	DGKK	CTLA2B	DGKK	ENPP4	CDK1
H2BC21	PTHLH	ATIC	DGKQ	GPR15	DGKQ	ENTPD1	CSK
H2BC3	PTPRO	MRPL1	DGKZ	PFKL	DGKZ	ENTPD2	GRB2
H2BC4	PVT1	POLS	DMTN	PENK	DMTN	EPB41L4B	PRKCA
H2BC5	ST3GAL3	MGC3036	DOCK1	CTSH	DOCK1	EPHB2	PRKCB
H2BC6	TEAD2	LOC283596	DOCK11	EDNRB	DOCK11	EPPK1	PTPRA
H2BC7	ADAM10	BST1	DOCK6	HSF2	DOCK6	ERBB2	VPS16
H2BC8	ADAM17	TP53I11	DOCK8	IL18RAP	DOCK8	ERBB3	APAF1
H2BC9	APH1A	GYG2	DOCK9	GALC	DOCK9	EREG	ARHGDIB
H2BS1	APH1B	Prostein	DRD5	FGL2	DRD5	ETS1	BIRC2
H2BU1	ARRB1	STK33	DSP	SLC15A3	DSP	EVPL	BIRC3
H3-3A	ARRB2	PKMYT1	DTNBP1	ERO1L	DTNBP1	EVPLL	CASP1
H3-3B	CNTN1	DDX28	DUOX1	MMP25	DUOX1	F10	CASP10
H3-4	DLK1	MCM3	DUOX2	CYSLTR2	DUOX2	F11	CASP2
H3C1	DLL1	CDC6	DUSP10	TTC39C	DUSP10	F12	CASP3
H3C10	DLL4	UBA52	DYSF	CCL3	DYSF	F13B	CASP4
H3C11	DNER	TARBP1	EDN1	CMA2	EDN1	F2	CASP6
H3C12	DTX1	DMD	EGFR	NFKBIA	EGFR	F2R	CASP7
H3C13	DTX2	ALDH1A1	EHD1	CYSLTR1	EHD1	F2RL1	CASP8
H3C14	DTX4	LOC91942	EHD2	HBA-A2	EHD2	F2RL2	CASP9
H3C15	ITCH	CDC25B	EHD3	NOTCH4	EHD3	F2RL3	DFFA
H3C2	JAG1	CDK1	ELK3	MPHOSPH6	ELK3	F3	DFFB
H3C3	JAG2	CSK	ENPP4	ITPRIPL2	ENPP4	F5	GZMB
H3C4	MIB1	GRB2	ENTPD1	SNORD58B	ENTPD1	F7	LMNA
H3C6	MIB2	PRKCA	ENTPD2	SNCA	ENTPD2	F8	LMNB1
H3C7	NCSTN	PRKCB	EPB41L4B	KCNA4	EPB41L4B	F9	LMNB2
H3C8	NEURL1	PTPRA	EPHB2	GEM	EPHB2	FER1L5	PARP1
H4-16	NEURL1B	VPS16	EPPK1	NPNT	EPPK1	FERMT3	PRF1
H4C1	NOTCH1	PSMD3	ERBB2	CMA2///MCPT9	ERBB2	FGF1	XIAP
H4C11	NUMB	PSMD9	ERBB3	PDE8A	ERBB3	FGF10	PSMD3
H4C12	PSEN1	PSMD12	EREG	HAVCR2	EREG	FGFR1OP2	PSMD9
H4C13	PSEN2	PSMD11	ETS1	HBB-BT	ETS1	FGFR2	PSMD12
H4C14	PSENEN	PSMD6	EVPL	MCPT2	EVPL	FIBP	PSMD11
H4C15	RPS27A	PSMD7	EVPLL	GGH	EVPLL	FLNA	PSMD6
H4C2	UBA52	PSMD13	F10	CXCL2	F10	FN1	PSMD7
H4C3	UBB	PSMD14	F11	ALAS2	F11	FOXA2	PSMD13
H4C4	UBC	PSMD8	F12	PIM1	F12	FOXC2	PSMD14
H4C5	DKFZP586A	SEM1	F13B	VCPKMT	F13B	FUT10	PSMD8
H4C6	SERPINE2	PSMD4	F2	SLC25A19	F2	FYN	SEM1
H4C8	ID3	PSMD2	F2R	CCRL2	F2R	FZD6	PSMD4
H4C9	CLIC4	PSMD1	F2RL1	CXCR6	F2RL1	FZD7	PSMD2
HAUS1	CCR8	ADRM1	F2RL2	PI4K2A	F2RL2	GAS6	PSMD1
HAUS2	FANCL	PSMC2	F2RL3	ADGRG5	F2RL3	GATA1	ADRM1
HAUS3	TOP2A	PSMC1	F3	CCR8	F3	GATA2	PSMC2
HAUS4	GEM	PSMC5	F5	FRMD5	F5	GATA3	PSMC1
HAUS5	TM4SF13	PSMC6	F7	PURB	F7	GATA4	PSMC5
HAUS6	MKI67	PSMC3	F8	IL17RB	F8	GATA5	PSMC6
HAUS7	ICA1	PSMC4	F9	SYTL3	F9	GATA6	PSMC3
HAUS8	NR4A1	PSME1	FER1L5	LAMC1	FER1L5	GGCX	PSMC4
HDAC1	PTPLA	PSME2	FERMT3	CDKN1B	FERMT3	GJA1	PSME1
HDAC8	DFNB31	PSME3	FGF1	CEP85L	FGF1	GLI3	PSME2
HERC2	SPC25	PSME4	FGF10	GYPA	FGF10	GNA11	PSME3
HJURP	CPE	PSMA6	FGFR1OP2	MKNK2	FGFR1OP2	GNA12	PSME4
HMMR	CPM	PSMA2	FGFR2	ATXN1	FGFR2	GNA13	PSMA6
HSP90AB1	DAZL	PSMA4	FIBP	IKZF5	FIBP	GNA14	PSMA2
HSPA2	SIP	PSMA7	FLNA	IRS2	FLNA	GNA15	PSMA4
HUS1	ARHI	PSMA8	FN1	ADAM8	FN1	GNAQ	PSMA7
INCENP	ADH1A	PSMA5	FOXA2	PCYT1A	FOXA2	GNAS	PSMA8
IST1	ADH1B	PSMA1	FOXC2	JUN	FOXC2	GNB1	PSMA5
ITGB3BP	ADH1C	PSMA3	FUT10	PLXND1	FUT10	GNG2	PSMA1
JAK2	ADH4	PSMB6	FYN	CHIA	FYN	GP1BA	PSMA3
KIF18A	ADH5	PSMB7	FZD6	CHIT1	FZD6	GP1BB	PSMB6
KIF20A	ADH6	PSMB3	FZD7	HEXA	FZD7	GP5	PSMB7
KIF23	ADH7	PSMB2	GAS6	HEXB	GAS6	GP6	PSMB3
KIF2A	COMT	PSMB5	GATA1	NAGK	GATA1	GP9	PSMB2
KIF2B	GOT1L1	PSMB1	GATA2	PGM3	GATA2	GPR4	PSMB5
KIF2C	DBH	PSMB4	GATA3	UAP1	GATA3	GPX1	PSMB1
KMT5A	DCT	PSMB9	GATA4	UAP1L1	GATA4	GRHL3	PSMB4
KNL1	DDC	PSMB10	GATA5	GNE	GATA5	GSN	PSMB9
KNTC1	ALDH3A1	PSMB8	GATA6	RENBP	GATA6	H3-3A	PSMB10
KPNB1	FAH	PSMB11	GGCX	NANS	GGCX	H3-3B	PSMB8
LBR	LRTOMT	IFNG	GJA1	NANP	GJA1	H3C1	PSMB11
LCMT1	ALDH3B1	PSMF1	GLI3	NPL	GLI3	H3C10	IFNG
LEMD2	ALDH3B2	POMP	GNA11	CMAS	GNA11	H3C11	PSMF1
LEMD3	IL4I1	AAAS	GNA12	CYB5R1	GNA12	H3C12	POMP
LIG1	GOT1	ABL1	GNA13	CYB5R3	GNA13	H3C13	AAAS
LIN37	GOT2	ABRAXAS1	GNA14	CYB5R2	GNA14	H3C14	ABL1
LIN52	GSTZ1	ACD	GNA15	CYB5RL	GNA15	H3C15	ABRAXAS1
LIN54	HGD	ACTR1A	GNAQ	CYB5R4	GNAQ	H3C2	ACD
LIN9	AOC2	AHCTF1	GNAS	HK3	GNAS	H3C3	ACTR1A
LPIN1	AOX1	AJUBA	GNB1	HK1	GNB1	H3C4	AHCTF1
LPIN2	HPD	AKAP9	GNG2	HKDC1	GNG2	H3C6	AJUBA
LPIN3	MAOA	AKT1	GP1BA	AMDHD2	GP1BA	H3C7	AKAP9
LYN	MAOB	AKT2	GP1BB	GNPNAT1	GP1BB	H3C8	AKT1
MAD1L1	MIF	AKT3	GP5	GNPDA1	GP5	HBB	AKT2
MAD2L1	PNMT	ALMS1	GP6	GNPDA2	GP6	HBD	AKT3
MAPK1	TAT	ANAPC10	GP9	GFPT2	GP9	HBE1	ALMS1
MAPRE1	TH	ANAPC11	GPR4	GFPT1	GPR4	HBEGF	ANAPC10
MASTL	TPO	ANAPC15	GPX1	UXS1	GPX1	HBG1	ANAPC11
MAU2	TYR	ANAPC16	GRHL3	GCK	GRHL3	HBG2	ANAPC15
MCM10	TYRP1	ANAPC2	GSN	GPI	GSN	HDAC1	ANAPC16
MCM2	FAHD1	ANAPC4	H3-3A	PGM1	H3-3A	HDAC2	ANAPC2
MCM3	AOC3	ANAPC5	H3-3B	PGM2	H3-3B	HGFAC	ANAPC4
MCM4	PLA2G4B	ANAPC7	H3C1	UGDH	H3C1	HIF1A	ANAPC5
MCM5	LPCAT3	ANKLE2	H3C10	GALK1	H3C10	HMG20B	ANAPC7
MCM6	CEPT1	ANKRD28	H3C11	GALT	H3C11	HMGCR	ANKLE2
MCM7	CDS1	ARPP19	H3C12	GALE	H3C12	HMOX1	ANKRD28
MCM8	PEMT	ATM	H3C13	PMM2	H3C13	HNF4A	ARPP19
MCPH1	CDIPT	ATR	H3C14	PMM1	H3C14	HPS4	ATM
MDC1	LYPLA1	ATRIP	H3C15	GMPPB	H3C15	HPS5	ATR
MDM2	AGPAT1	ATRX	H3C2	GMPPA	H3C2	HPS6	ATRIP
MDM4	AGPAT2	AURKA	H3C3	GMDS	H3C3	HPSE	ATRX
MIS12	PNPLA6	B9D2	H3C4	MPI	H3C4	HRAS	AURKA
MIS18A	CHAT	BABAM1	H3C6	FCSK	H3C6	HRG	B9D2
MIS18BP1	PLAAT3	BABAM2	H3C7	FPGT	H3C7	HSPB1	BABAM1
MLH1	CHKA	BANF1	H3C8	GFUS	H3C8	IFNA1	BABAM2
MLH3	CHKB	BARD1	HBB	GLYCTK	HBB	IFNA10	BANF1
MNAT1	LYPLA2	BLM	HBD	FBP1	HBD	IFNA13	BARD1
MND1	PLD4	BLZF1	HBE1	PRPS1L1	HBE1	IFNA14	BLM
MRE11	PLA2G4E	BORA	HBEGF	ALDOA	HBEGF	IFNA16	BLZF1
MSH4	MBOAT2	BRCA1	HBG1	RPIA	HBG1	IFNA17	BORA
MSH5	GPAT4	BRCA2	HBG2	G6PD	HBG2	IFNA2	BRCA1
MYBL2	DGKK	BRCC3	HDAC1	PGLS	HDAC1	IFNA21	BRCA2
MZT1	GPAT2	BRIP1	HDAC2	IDNK	HDAC2	IFNA4	BRCC3
MZT2A	PLB1	BUB1	HGFAC	DERA	HGFAC	IFNA5	BRIP1
MZT2B	MBOAT1	BUB1B	HIF1A	PFKM	HIF1A	IFNA6	BTRC
NCAPD2	DGKA	BUB3	HMG20B	PFKP	HMG20B	IFNA7	BUB1
NCAPD3	DGKB	CABLES1	HMGCR	PGD	HMGCR	IFNA8	BUB1B
NCAPG	DGKH	CC2D1B	HMOX1	PRPS1	HMOX1	IFNB1	BUB3
NCAPG2	DGKQ	CCNA1	HNF4A	PRPS2	HNF4A	IL1A	CABLES1
NCAPH	PHOSPHO1	CCND3	HPS4	RPE	HPS4	IL24	CC2D1B
NCAPH2	PLPP4	CCNE2	HPS5	RBKS	HPS5	IL6	CCNA1
NDC1	GPD1L	CCNH	HPS6	TALDO1	HPS6	ILK	CCND1
NDC80	LPIN1	CCP110	HPSE	TKT	HPSE	INS	CCND3
NDE1	PLD3	CDC14A	HRAS	RPEL1	HRAS	INSL3	CCNE2
NDEL1	PLA2G15	CDC16	HRG	TKTL1	HRG	IRF1	CCNH
NEDD1	PISD	CDC23	HSPB1	TKTL2	HSPB1	IRF2	CCP110
NEK2	LCLAT1	CDC26	IFNA1	FBP2	IFNA1	ITGA2	CDC14A
NEK6	LPCAT4	CDC27	IFNA10	RGN	IFNA10	ITGA2B	CDC16
NEK7	PLA2G4F	CDC45	IFNA13	H6PD	IFNA13	ITGA5	CDC23
NEK9	PLA2G2D	CDCA8	IFNA14	AKR1B1	IFNA14	ITGA9	CDC26
NHP2	GPD1	CDK11A	IFNA16	TKFC	IFNA16	ITGB1	CDC27
NINL	GPD2	CDK11B	IFNA17	KHK	IFNA17	ITGB3	CDC45
NIPBL	PLA2G4D	CDK2	IFNA2	PFKFB1	IFNA2	ITPK1	CDCA8
NME7	PLA2G2E	CDK5RAP2	IFNA21	PFKFB2	IFNA21	ITPR1	CDK11A
NOP10	PNPLA7	CDK7	IFNA4	PFKFB3	IFNA4	ITPR2	CDK11B
NSD2	PLA2G2C	CDKN1B	IFNA5	PFKFB4	IFNA5	ITPR3	CDK2
NSL1	LCAT	CDKN1C	IFNA6	ENOSF1	IFNA6	JAK2	CDK5RAP2
NUDC	PLA2G3	CDKN2A	IFNA7	TIGAR	IFNA7	JAML	CDK7
NUF2	PCYT1A	CDKN2C	IFNA8	SORD	IFNA8	JMJD1C	CDKN1B
NUMA1	PLA1A	CDKN2D	IFNB1	TPI1	IFNB1	KANK1	CDKN1C
NUP107	PLA2G1B	CENPC	IL1A	TREH	IL1A	KDM1A	CDKN2A
NUP133	PLA2G2A	CENPH	IL24	AGL	IL24	KLKB1	CDKN2C
NUP153	PLA2G4A	CENPI	IL6	G6PC1	IL6	KNG1	CDKN2D
NUP155	PLA2G5	CENPJ	ILK	GAA	ILK	KRT1	CENPC
NUP160	PLD1	CENPK	INS	GANC	INS	KRT6A	CENPH
NUP188	PLD2	CENPL	INSL3	GBE1	INSL3	LACRT	CENPI
NUP205	CRLS1	CENPM	IRF1	AMY1A	IRF1	LMAN1	CENPJ
NUP210	LPCAT2	CENPN	IRF2	AMY1B	IRF2	LNPK	CENPK
NUP214	ETNK2	CENPO	ITGA2	AMY1C	ITGA2	LOX	CENPL
NUP35	AGPAT5	CENPP	ITGA2B	AMY2A	ITGA2B	LYN	CENPM
NUP37	ETNK1	CENPQ	ITGA5	AMY2B	ITGA5	MACF1	CENPN
NUP42	GPCPD1	CENPS	ITGA9	PGM2L1	ITGA9	MAFF	CENPO
NUP43	AGPAT3	CENPT	ITGB1	GYG1	ITGB1	MAFG	CENPP
NUP50	AGPAT4	CENPU	ITGB3	GYS1	ITGB3	MAFK	CENPQ
NUP54	ADPRM	CENPW	ITPK1	GYS2	ITPK1	MAP3K5	CENPS
NUP58	CHPT1	CENPX	ITPR1	ENPP3	ITPR1	MAPK1	CENPT
NUP62	GPAM	CEP131	ITPR2	GBA3	ITPR2	MAPK3	CENPU
NUP85	PCYT2	CEP135	ITPR3	G6PC2	ITPR3	MCAM	CENPW
NUP88	PLA2G2F	CEP152	JAK2	PYGB	JAK2	MERTK	CENPX
NUP93	ETNPPL	CEP164	JAML	PYGL	JAML	METAP1	CEP131
NUP98	LPIN3	CEP192	JMJD1C	PYGM	JMJD1C	MFN2	CEP135
ODF2	TAZ	CEP250	KANK1	SI	KANK1	MIA3	CEP152
OFD1	MBOAT7	CEP290	KDM1A	GYG2	KDM1A	MIR1298	CEP164
OIP5	LPCAT1	CEP41	KLKB1	MGAM	KLKB1	MIR15B	CEP192
OPTN	PTDSS2	CEP43	KNG1	G6PC3	KNG1	MIR17	CEP250
ORC1	PLA2G12A	CEP57	KRT1	MGAM2	KRT1	MIR200B	CEP290
ORC2	PLA2G6	CEP63	KRT6A	GALM	KRT6A	MIR221	CEP41
ORC3	PLA2G10	CEP70	LACRT	B4GALT1	LACRT	MIR29B1	CEP43
ORC4	GNPAT	CEP72	LMAN1	GLA	LMAN1	MIR29B2	CEP57
ORC5	PLPP5	CEP76	LNPK	GLB1	LNPK	MIR34A	CEP63
ORC6	PLA2G12B	CEP78	LOX	LALBA	LOX	MIR451A	CEP70
PAFAH1B1	GPAT3	CETN2	LYN	LCT	LYN	MIR892B	CEP72
PCBP4	DGKZ	CHEK2	MACF1	B4GALT2	MACF1	MMP12	CEP76
PCM1	DGKE	CHMP2A	MAFF	AADAT	MAFF	MMRN1	CEP78
PCNA	DGKD	CHMP2B	MAFG	ADHFE1	MAFG	MPIG6B	CETN2
PCNT	SELENOI	CHMP3	MAFK	ADSS1	MAFK	MPL	CHEK2
PDS5A	PLA2G4C	CHMP4A	MAP3K5	AGMAT	MAP3K5	MRTFA	CHMP2A
PDS5B	PLPP1	CHMP4B	MAPK1	ALDH18A1	MAPK1	MSX2	CHMP2B
PHF20	PLPP2	CHMP4C	MAPK3	ALDH4A1	MAPK3	MTOR	CHMP3
PHF8	PLPP3	CHMP6	MCAM	ALDH5A1	MCAM	MYH10	CHMP4A
PHLDA1	JMJD7-PLA2G4B	CHMP7	MERTK	AMDHD1	MERTK	MYH9	CHMP4B
PIAS4	CDS2	CHTF18	METAP1	ARG1	METAP1	MYL12A	CHMP4C
PIF1	DGKI	CHTF8	MFN2	ARG2	MFN2	MYL9	CHMP6
PKMYT1	PCYT1B	CKAP5	MIA3	ART4	MIA3	MYLK	CHMP7
PLK1	PGS1	CKS1B	MIR1298	ASL	MIR1298	MYOF	CHTF18
PLK4	PTDSS1	CLASP1	MIR15B	ASNS	MIR15B	MYOZ1	CHTF8
PMF1	LPGAT1	CLASP2	MIR17	ASNSD1	MIR17	NDNF	CKAP5
POLA1	PTGES3	CLIP1	MIR200B	ASRGL1	MIR200B	NF1	CKS1B
POLA2	CYP4F8	CLSPN	MIR221	ASS1	MIR221	NFE2	CLASP1
POLD1	CYP2U1	CNEP1R1	MIR29B1	ATCAY	MIR29B1	NFE2L2	CLASP2
POLD2	PRXL2B	CNTRL	MIR29B2	ATP2B4	MIR29B2	NLRP6	CLIP1
POLD3	CYP2B6	COP1	MIR34A	CAD	MIR34A	NOG	CLSPN
POLD4	CYP2C19	CSNK1D	MIR451A	CLN3	MIR451A	NOS3	CNEP1R1
POLE	CYP2C8	CSNK1E	MIR892B	CPS1	MIR892B	NOTCH2	CNTRL
POLE2	CYP2C9	CSNK2A2	MMP12	CTPS1	MMP12	NOTCH4	COP1
POLE3	CYP2J2	CSNK2B	MMRN1	CTPS2	MMRN1	NRG1	CSNK1D
POLE4	EPHX2	CTC1	MPIG6B	DAO	MPIG6B	OCLN	CSNK1E
POLR2A	ALOX12	CTDNEP1	MPL	DDAH1	MPL	ODAM	CSNK2A1
POLR2B	ALOX12B	CUL1	MRTFA	DDAH2	MRTFA	OPRM1	CSNK2A2
POLR2C	ALOX15	DAXX	MSX2	DGLUCY	MSX2	P2RX1	CSNK2B
POLR2D	ALOX15B	DBF4	MTOR	FAH	MTOR	P2RX2	CTC1
POLR2E	GPX6	DCTN1	MYH10	FPGS	MYH10	P2RX3	CTDNEP1
POLR2F	GGT1	DCTN2	MYH9	FTCD	MYH9	P2RX4	CUL1
POLR2G	GGT5	DCTN3	MYL12A	GAD1	MYL12A	P2RX5	DAXX
POLR2H	HPGDS	DHFR	MYL9	GAD2	MYL9	P2RX6	DBF4
POLR2I	GPX1	DIDO1	MYLK	GCLC	MYLK	P2RX7	DCTN1
POLR2J	GPX3	DMC1	MYOF	GCLM	MYOF	P2RY1	DCTN2
POLR2K	GPX5	DNA2	MYOZ1	GGT1	MYOZ1	P2RY12	DCTN3
POLR2L	GPX7	DSCC1	NDNF	GLS	NDNF	PABPC4	DHFR
POM121	LTA4H	DSN1	NF1	GLS2	NF1	PAFAH2	DIDO1
POM121C	CYP4F3	DYNC1H1	NFE2	GLUD1	NFE2	PAK1	DMC1
POT1	LTC4S	DYNC1I1	NFE2L2	GLUD2	NFE2L2	PAPSS2	DNA2
PPME1	GPX8	DYNC1I2	NLRP6	GLUL	NLRP6	PDCD10	DSCC1
PPP1CB	PTGDS	DYNC1LI1	NOG	GLYATL1	NOG	PDGFA	DSN1
PPP1CC	PTGIS	DYNC1LI2	NOS3	GLYATL1B	NOS3	PDGFB	DYNC1H1
PPP1R12A	PTGS1	DYNLL1	NOTCH2	GMPS	NOTCH2	PDGFRA	DYNC1I1
PPP1R12B	PTGS2	DYNLL2	NOTCH4	GOT1	NOTCH4	PDPK1	DYNC1I2
PPP2CA	TBXAS1	DYRK1A	NRG1	GOT2	NRG1	PDPN	DYNC1LI1
PPP2CB	PTGES2	E2F1	OCLN	HAL	OCLN	PEAR1	DYNC1LI2
PPP2R1A	CYP4F2	E2F2	ODAM	MECP2	ODAM	PECAM1	DYNLL1
PPP2R1B	AKR1C3	E2F4	OPRM1	MIR21	OPRM1	PF4	DYNLL2
PPP2R2A	CBR1	E2F5	P2RX1	MTHFS	P2RX1	PF4V1	DYRK1A
PPP2R2D	CBR3	E2F6	P2RX2	NAGS	P2RX2	PHF21A	E2F1
PPP2R3B	PTGES	EMD	P2RX3	NIT2	P2RX3	PHLDB2	E2F2
PPP2R5A		EML4	P2RX4	NOS1	P2RX4	PIK3CA	E2F4
PPP2R5B		ENSA	P2RX5	NOS2	P2RX5	PIK3CB	E2F5
PPP2R5C		ERCC6L	P2RX6	NOS3	P2RX6	PIK3CG	E2F6
PPP2R5D		ESCO1	P2RX7	NOXRED1	P2RX7	PIK3R1	EMD
PPP2R5E		ESCO2	P2RY1	NR1H4	P2RY1	PIK3R6	EML4
PPP6C		ESPL1	P2RY12	OAT	P2RY12	PLA2G4A	ENSA
PPP6R3		FBXL18	PABPC4	OTC	PABPC4	PLAT	ERCC6L
PRDM9		FBXL7	PAFAH2	PFAS	PAFAH2	PLAU	ESCO1
PRIM1		FBXO5	PAK1	PHGDH	PAK1	PLAUR	ESCO2
PRIM2		FBXW11	PAPSS2	PPAT	PAPSS2	PLCG2	ESPL1
PRKACA		FKBP6	PDCD10	PRODH	PDCD10	PLEC	FBXL18
PRKAR2B		FKBPL	PDGFA	PRODH2	PDGFA	PLET1	FBXL7
PRKCA		FZR1	PDGFB	PYCR1	PDGFB	PLG	FBXO5
PRKCB		GAR1	PDGFRA	PYCR2	PDGFRA	PLPP3	FBXW11
PSMC3IP		GINS1	PDPK1	PYCR3	PDPK1	PLSCR1	FKBP6
PSMD10		GINS2	PDPN	SIRT4	PDPN	POSTN	FKBPL
PSMD5		GINS3	PEAR1	SLC25A12	PEAR1	PPARA	FZR1
PTK6		GINS4	PECAM1	SLC39A8	PECAM1	PPARD	GAR1
PTTG1		GOLGA2	PF4	SLC7A11	PF4	PPL	GINS1
RAB1A		GORASP1	PF4V1	SLC7A7	PF4V1	PPP3CA	GINS2
RAB1B		GORASP2	PHF21A	TAT	PHF21A	PRCP	GINS3
RAB2A		GTSE1	PHLDB2	UROC1	PHLDB2	PRDX2	GINS4
RAB8A		H2AB1	PIK3CA	GSTO2	PIK3CA	PRKACA	GOLGA2
RAD1		H2AC14	PIK3CB	GGT6	PIK3CB	PRKACB	GORASP1
RAD17		H2AC18	PIK3CG	GSTA5	PIK3CG	PRKACG	GORASP2
RAD21		H2AC19	PIK3R1	GPX6	PIK3R1	PRKAR1A	GSK3B
RAD50		H2AC20	PIK3R6	GGT7	PIK3R6	PRKAR1B	GTSE1
RAD51		H2AC4	PLA2G4A	GGT5	PLA2G4A	PRKAR2A	H2AB1
RAD51C		H2AC6	PLAT	OPLAH	PLAT	PRKAR2B	H2AC14
RAD9A		H2AC7	PLAU	HPGDS	PLAU	PRKCA	H2AC18
RAD9B		H2AC8	PLAUR	GPX1	PLAUR	PRKCB	H2AC19
RAE1		H2AJ	PLCG2	GPX3	PLCG2	PRKCD	H2AC20
RAN		H2AX	PLEC	GPX4	PLEC	PRKCE	H2AC4
RANBP2		H2AZ1	PLET1	GPX5	PLET1	PRKCG	H2AC6
RANGAP1		H2AZ2	PLG	GPX7	PLG	PRKCH	H2AC7
RB1		H2BC1	PLPP3	GSR	PLPP3	PRKCQ	H2AC8
RBBP4		H2BC10	PLSCR1	GSS	PLSCR1	PROC	H2AJ
RBBP7		H2BC11	POSTN	GSTA1	POSTN	PROCR	H2AX
RBBP8		H2BC12	PPARA	GSTA2	PPARA	PROS1	H2AZ1
RBL1		H2BC13	PPARD	GSTA3	PPARD	PROZ	H2AZ2
RBL2		H2BC14	PPL	GSTA4	PPL	PRSS56	H2BC1
RBX1		H2BC15	PPP3CA	GSTM1	PPP3CA	PRTN3	H2BC10
RCC2		H2BC17	PRCP	GSTM2	PRCP	PTEN	H2BC11
REC8		H2BC21	PRDX2	GSTM3	PRDX2	PTK2	H2BC12
RFC1		H2BC3	PRKACA	GSTM4	PRKACA	PTK7	H2BC13
RFC2		H2BC4	PRKACB	GSTM5	PRKACB	PTPN11	H2BC14
RFC3		H2BC5	PRKACG	GSTP1	PRKACG	PTPN6	H2BC15
RFC4		H2BC6	PRKAR1A	GSTT1	PRKAR1A	RAB3A	H2BC17
RFC5		H2BC7	PRKAR1B	GSTT2	PRKAR1B	RAB5A	H2BC21
RHNO1		H2BC8	PRKAR2A	IDH1	PRKAR2A	RAC1	H2BC3
RMI1		H2BC9	PRKAR2B	IDH2	PRKAR2B	RAD51B	H2BC4
RMI2		H2BS1	PRKCA	GSTK1	PRKCA	RAD51C	H2BC5
RNF168		H2BU1	PRKCB	MGST2	PRKCB	RAF1	H2BC6
RNF8		H3-3A	PRKCD	MGST3	PRKCD	RAP2B	H2BC7
RPA1		H3-3B	PRKCE	GPX8	PRKCE	RBSN	H2BC8
RPA2		H3-4	PRKCG	CHAC2	PRKCG	RCOR1	H2BC9
RPA3		H3C1	PRKCH	RRM2B	PRKCH	REG1A	H2BS1
RPA4		H3C10	PRKCQ	LAP3	PRKCQ	REG3A	H2BU1
RPS27		H3C11	PROC	TXNDC12	PROC	REG3G	H3-3A
RPS27A		H3C12	PROCR	NAT8B	PROCR	RHOA	H3-3B
RRM2		H3C13	PROS1	RRM1	PROS1	RHOC	H3-4
RSF1		H3C14	PROZ	RRM2	PROZ	RREB1	H3C1
RTEL1		H3C15	PRSS56	GSTT2B	PRSS56	SAA1	H3C10
SDCCAG8		H3C2	PRTN3	SMS	PRTN3	SCARB1	H3C11
SEC13		H3C3	PTEN	SRM	PTEN	SCRIB	H3C12
SEH1L		H3C4	PTK2	GGCT	PTK2	SCUBE1	H3C13
SET		H3C6	PTK7	CHAC1	PTK7	SDC1	H3C14
SFI1		H3C7	PTPN11	NAT8	PTPN11	SDC4	H3C15
SFN		H3C8	PTPN6	GSTO1	PTPN6	SELP	H3C2
SGO1		H4-16	RAB3A	CA5B	RAB3A	SERPINA1	H3C3
SGO2		H4C1	RAB5A	CA14	RAB5A	SERPINA10	H3C4
SHQ1		H4C11	RAC1	CA13	RAC1	SERPINA5	H3C6
SIRT2		H4C12	RAD51B	CA1	RAD51B	SERPINB2	H3C7
SKA1		H4C13	RAD51C	CA2	RAD51C	SERPINC1	H3C8
SKA2		H4C14	RAF1	CA3	RAF1	SERPIND1	H4-16
SKP1		H4C15	RAP2B	CA5A	RAP2B	SERPINE1	H4C1
SKP2		H4C2	RBSN	CA6	RBSN	SERPINE2	H4C11
SMARCA5		H4C3	RCOR1	CA7	RCOR1	SERPINF2	H4C12
SMC1A		H4C4	REG1A	CA8	REG1A	SFTA3	H4C13
SMC1B		H4C5	REG3A	CA9	REG3A	SH2B1	H4C14
SMC2		H4C6	REG3G	ADH1A	REG3G	SH2B2	H4C15
SMC3		H4C8	RHOA	ADH1B	RHOA	SHH	H4C2
SMC4		H4C9	RHOC	ADH1C	RHOC	SLC11A1	H4C3
SPAST		HAUS1	RREB1	ADH4	RREB1	SLC12A2	H4C4
SPC24		HAUS2	SAA1	ADH5	SAA1	SLC4A1	H4C5
SPC25		HAUS3	SCARB1	ADH6	SCARB1	SLC7A11	H4C6
SPDL1		HAUS4	SCRIB	ADH7	SCRIB	SMOC2	H4C8
SPO11		HAUS5	SCUBE1	COMT	SCUBE1	SPARC	H4C9
SRC		HAUS6	SDC1	GOT1L1	SDC1	SPRR3	HAUS1
SSNA1		HAUS7	SDC4	DBH	SDC4	SRC	HAUS2
STAG1		HAUS8	SELP	DCT	SELP	SRF	HAUS3
STAG2		HDAC8	SERPINA1	DDC	SERPINA1	SRSF6	HAUS4
STAG3		HERC2	SERPINA10	ALDH3A1	SERPINA10	STXBP1	HAUS5
STN1		HJURP	SERPINA5	LRTOMT	SERPINA5	STXBP3	HAUS6
SUMO1		HMMR	SERPINB2	ALDH3B1	SERPINB2	SYK	HAUS7
SUN1		HSP90AB1	SERPINC1	ALDH3B2	SERPINC1	SYT11	HAUS8
SUN2		HSPA2	SERPIND1	IL4I1	SERPIND1	SYT7	HDAC1
SYCE1		HUS1	SERPINE1	GSTZ1	SERPINE1	SYTL4	HDAC8
SYCE2		INCENP	SERPINE2	HGD	SERPINE2	TBXA2R	HERC2
SYCE3		IST1	SERPINF2	AOC2	SERPINF2	TEC	HJURP
SYCP1		JAK2	SFTA3	AOX1	SFTA3	TFPI	HMMR
SYCP2		KIF18A	SH2B1	HPD	SH2B1	TFPI2	HSP90AB1
SYCP3		KIF20A	SH2B2	MAOA	SH2B2	THBD	HSPA2
SYNE1		KIF23	SHH	MAOB	SHH	THBS1	HUS1
SYNE2		KIF2A	SLC11A1	MIF	SLC11A1	TIMP1	INCENP
TAOK1		KIF2B	SLC12A2	PNMT	SLC12A2	TLN1	IST1
TEN1		KIF2C	SLC4A1	TH	SLC4A1	TLR4	JAK2
TERF1		KMT5A	SLC7A11	TPO	SLC7A11	TMEFF2	KIF18A
TERF2		KNL1	SMOC2	TYR	SMOC2	TNC	KIF20A
TERF2IP		KNTC1	SPARC	TYRP1	SPARC	TNF	KIF23
TEX12		KPNB1	SPRR3	FAHD1	SPRR3	TNFRSF12A	KIF2A
TEX15		LCMT1	SRC	AOC3	SRC	TOR1A	KIF2B
TFDP1		LEMD2	SRF	PLA2G4B	SRF	TPM1	KIF2C
TFDP2		LEMD3	SRSF6	LPCAT3	SRSF6	TREML1	KMT5A
TINF2		LIG1	STXBP1	CEPT1	STXBP1	TRIM72	KNL1
TMPO		LIN37	STXBP3	CDS1	STXBP3	TRPC3	KNTC1
TNPO1		LIN52	SYK	PEMT	SYK	TRPC6	KPNB1
TOP2A		LIN54	SYT11	CDIPT	SYT11	TRPC7	LCMT1
TOP3A		LIN9	SYT7	LYPLA1	SYT7	TSPAN32	LEMD2
TOPBP1		LMNA	SYTL4	AGPAT1	SYTL4	TSPAN8	LEMD3
TP53BP1		LMNB1	TBXA2R	AGPAT2	TBXA2R	TXK	LIG1
TPR		LPIN1	TEC	PNPLA6	TEC	TYRO3	LIN37
TPX2		LPIN2	TFPI	CHAT	TFPI	UBASH3B	LIN52
TUBA1A		LPIN3	TFPI2	PLAAT3	TFPI2	USF1	LIN54
TUBA1B		LYN	THBD	CHKA	THBD	VANGL2	LIN9
TUBA1C		MAD1L1	THBS1	CHKB	THBS1	VAV2	LPIN1
TUBA3C		MAPK1	TIMP1	LYPLA2	TIMP1	VAV3	LPIN2
TUBA3D		MAPK3	TLN1	PLD4	TLN1	VCL	LPIN3
TUBA3E		MAPRE1	TLR4	PLA2G4E	TLR4	VEGFA	LYN
TUBA4A		MASTL	TMEFF2	MBOAT2	TMEFF2	VIL1	MAD1L1
TUBA4B		MAU2	TNC	GPAT4	TNC	VKORC1	MAPK1
TUBA8		MCM10	TNF	DGKK	TNF	VPS45	MAPK3
TUBAL3		MCM2	TNFRSF12A	GPAT2	TNFRSF12A	VTN	MAPRE1
TUBB		MCM4	TOR1A	PLB1	TOR1A	VWF	MASTL
TUBB1		MCM5	TPM1	MBOAT1	TPM1	WAS	MAU2
TUBB2A		MCM7	TREML1	DGKA	TREML1	WFDC1	MCM10
TUBB2B		MCM8	TRIM72	DGKB	TRIM72	WNT3A	MCM2
TUBB3		MCPH1	TRPC3	DGKG	TRPC3	WNT4	MCM4
TUBB4A		MDC1	TRPC7	DGKH	TRPC7	WNT5A	MCM5
TUBB4B		MDM2	TSPAN32	DGKQ	TSPAN32	WNT5B	MCM7
TUBB6		MDM4	TSPAN8	PHOSPHO1	TSPAN8	WNT7A	MCM8
TUBB8		MIS12	TXK	PLPP4	TXK	XBP1	MCPH1
TUBB8B		MIS18A	TYRO3	GPD1L	TYRO3	YWHAZ	MDC1
TUBG1		MIS18BP1	UBASH3B	LPIN1	UBASH3B	ZFPM1	MDM2
TUBG2		MLH1	USF1	PLD3	USF1	ABTB2	MDM4
TUBGCP2		MLH3	VANGL2	PLA2G15	VANGL2	AFAP1L1	MIS12
TUBGCP3		MNAT1	VAV2	PISD	VAV2	APCDD1	MIS18A
TUBGCP4		MND1	VAV3	LCLAT1	VAV3	ARHGEF4	MIS18BP1
TUBGCP5		MRE11	VCL	LPCAT4	VCL	ARNT2	MLH1
TUBGCP6		MSH4	VEGFA	PLA2G4F	VEGFA	AXIN2	MLH3
TYMS		MSH5	VIL1	PLA2G2D	VIL1	BCL2	MNAT1
UBA52		MZT1	VKORC1	GPD1	VKORC1	BEX1	MND1
UBB		MZT2A	VPS45	GPD2	VPS45	BEX2	MRE11
UBC		MZT2B	VTN	PLA2G4D	VTN	CAP2	MSH4
UBE2C		NCAPD2	VWF	PLA2G2E	VWF	CCDC46	MSH5
UBE2D1		NCAPD3	WAS	PNPLA7	WAS	CYP2E1	MZT1
UBE2E1		NCAPG	WFDC1	PLA2G2C	WFDC1	DLGAP1	MZT2A
UBE2I		NCAPG2	WNT3A	LCAT	WNT3A	DTL	MZT2B
UBE2N		NCAPH	WNT4	PLA2G3	WNT4	DYNC2H1	NCAPD2
UBE2S		NCAPH2	WNT5A	PLA1A	WNT5A	EPHA4	NCAPD3
UBE2V2		NDC1	WNT5B	PLA2G1B	WNT5B	FAM64A	NCAPG
UIMC1		NDC80	WNT7A	PLA2G2A	WNT7A	FGFR4	NCAPG2
USO1		NDE1	XBP1	PLA2G4A	XBP1	FMNL2	NCAPH
VPS4A		NDEL1	YWHAZ	PLA2G5	YWHAZ	FSTL1	NCAPH2
VRK1		NEDD1	ZFPM1	PLD1	ZFPM1	GRAMD1A	NDC1
VRK2		NEK6	CSNK2A1	PLD2	HSPG2	GRK4	NDC80
WAPL		NEK7	ELK1	CRLS1	IBSP	IGF1R	NDE1
WEE1		NEK9	FOS	LPCAT2	ICAM1	IGFBP4	NDEL1
WRAP53		NHP2	GRB2	ETNK2	ICAM2	IL17RD	NEDD1
WRN		NINL	IL2	AGPAT5	ICAM3	KIF12	NEK6
XPO1		NIPBL	IL2RA	ETNK1	ICAM4	KIF26B	NEK7
YWHAB		NME7	JAK1	GPCPD1	ICAM5	KLHL13	NEK9
YWHAE		NOP10	JAK3	AGPAT3	ITGA1	LDHB	NHP2
YWHAG		NSD2	JUN	AGPAT4	ITGA10	LGR5	NINL
YWHAH		NSL1	MAP2K1	ADPRM	ITGA11	LIFR	NIPBL
YWHAQ		NUDC	MAPK8	CHPT1	ITGA3	LOC285141	NME7
YWHAZ		NUF2	SHC1	GPAM	ITGA6	MDFIC	NOP10
ZNF385A		NUMA1	SOS1	PCYT2	ITGA7	MPP3	NSD2
ZW10		NUP107	STAT5A	PLA2G2F	ITGA8	NPNT	NSL1
ZWILCH		NUP133	STAT5B	ETNPPL	ITGAD	PITPNC1	NUDC
ZWINT		NUP153	BLVRA	LPIN3	ITGAE	PLP1	NUF2
ACKR2		NUP155	BLVRB	TAZ	ITGAV	RASSF4	NUMA1
ACKR4		NUP160	IL10	MBOAT7	ITGAX	RNF157	NUP107
ADGRE5		NUP188	IL10RB	LPCAT1	ITGB5	SCN2B	NUP133
AIM2		NUP205	STAT1	PTDSS2	ITGB6	2006-09-01	NUP153
ANXA11		NUP210	STAT3	PLA2G12A	ITGB7	SERTAD4	NUP155
APLN		NUP214	HSPG2	PLA2G6	ITGB8	SLC1A2	NUP160
APOA1		NUP37	IBSP	PLA2G10	JAM2	SLC38A4	NUP188
APOA2		NUP42	ICAM1	GNPAT	JAM3	SLCO3A1	NUP205
APOA4		NUP43	ICAM2	PLPP5	MADCAM1	SLIT2	NUP210
APOBEC3F		NUP50	ICAM3	PLA2G12B	SPP1	SOAT1	NUP214
APOBEC3G		NUP54	ICAM4	GPAT3	FLT1	SORBS2	NUP37
AQP9		NUP58	ICAM5	DGKZ	FLT4	SOX4	NUP42
ATP6V0A2		NUP62	ITGA1	DGKE	PGF	TACC1	NUP43
BCAR1		NUP85	ITGA10	DGKD	VEGFB	TMEM182	NUP50
BCL10		NUP88	ITGA11	SELENOI	VEGFC	TNFRSF19	NUP54
BCL2		NUP93	ITGA3	PLA2G4C	VEGFD	UTRN	NUP58
BLNK		NUP98	ITGA6	PLPP1	PDCD1LG1	ZNF141	NUP62
BNIP3		ODF2	ITGA7	PLPP2	PDCD1LG2	ZNF273	NUP85
BNIP3L		OFD1	ITGA8	PLPP3	PDCD1	ZNF493	NUP88
BST1		OIP5	ITGAD	JMJD7-PLA2G4B	STAT1	ZNF626	NUP93
BST2		OPTN	ITGAE	CDS2	IFNG	ZNF678	NUP98
C1QBP		ORC1	ITGAV	DGKI	TBX21	ZNF680	ODF2
C2		ORC2	ITGAX	PCYT1B	ICOS	ZNF714	OFD1
C5AR1		ORC3	ITGB5	PGS1	TNFRSF6B	ZNF85	OIP5
CADM1		ORC4	ITGB6	PTDSS1	IL8	ZNF92	OPTN
CCL18		ORC5	ITGB7	LPGAT1	IRTA2	ZNF93	ORC1
CCL19		ORC6	ITGB8	ADCY1	INDO	ASRGL1	ORC2
CCL2		PAFAH1B1	JAM2	ADCY2	MMP7	CENPF	ORC3
CCL20		PCBP4	JAM3	ADCY3	LILRB3	EPHB3	ORC4
CCL21		PCM1	MADCAM1	ADCY4	PTGS2	PRELP	ORC5
CCL22		PCNA	SPP1	ADCY5	TNFRSF8	PSRC1	ORC6
CCL23		PCNT	FLT1	ADCY6	CD4	PTHLH	PAFAH1B1
CCL24		PDS5A	FLT4	ADCY7	CXCR3	PTPRO	PCBP4
CCL25		PDS5B	PGF	ADCY8	GAPD	PVT1	PCM1
CCL26		PHF20	VEGFB	ADCY9	CD8A	ST3GAL3	PCNA
CCL27		PHF8	VEGFC	ADRA1B	IRAK4	TEAD2	PCNT
CCL4		PIAS4	VEGFD	AKT1	CD3Z	HSPG2	PDS5A
CCR1		PIF1	ACKR2	ARHGEF1	EBAG9	IBSP	PDS5B
CCR2		PLK4	ACKR4	BCAR1	IL10	ICAM1	PHF20
CCR4		PMF1	ADGRE5	CRK	LAT	ICAM2	PHF8
CCR5		POLA1	AIM2	CXCL8	IL18	ICAM3	PIAS4
CCR6		POLA2	ANXA11	FOS	VEGF	ICAM4	PIF1
CCR8		POLD1	APLN	GAB1	THSD1	ICAM5	PLK4
CCR9		POLD2	APOA1	GNA12	FOXP3	ITGA1	PMF1
CD164		POLD3	APOA2	GNA13	CXCR6	ITGA10	POLA1
CD1D		POLD4	APOA4	GNA14	JAG1	ITGA11	POLA2
CD22		POLE	APOBEC3F	GNA15	TNFRSF10A	ITGA3	POLD1
CD274		POLE3	APOBEC3G	GNAI1	ACE	ITGA6	POLD2
CD28		POLE4	AQP9	GNAI2	B7H3	ITGA7	POLD3
CD40LG		POLR2A	ATP6V0A2	GNAI3	BIRC5	ITGA8	POLD4
CD7		POLR2B	BCAR1	GNAO1	CD97	ITGAD	POLE
CD79A		POLR2C	BCL10	GNAQ	ART1	ITGAE	POLE3
CD79B		POLR2D	BCL2	GNAZ	GLNY	ITGAV	POLE4
CD83		POLR2E	BLNK	GNB1	IL12RB2	ITGAX	POLR2A
CD86		POLR2F	BNIP3	GNG2	STAT4	ITGB5	POLR2B
CD96		POLR2G	BNIP3L	GSK3B		ITGB6	POLR2C
CEACAM8		POLR2H	BST1	HBEGF		ITGB7	POLR2D
CEBPB		POLR2I	BST2	HRAS		ITGB8	POLR2E
CEBPG		POLR2J	C2	IL6		JAM2	POLR2F
CFHR1		POLR2K	C5AR1	LPAR1		JAM3	POLR2G
CHST4		POLR2L	CADM1	LPAR2		MADCAM1	POLR2H
CHUK		POM121	CCL18	LPAR3		SPP1	POLR2I
CIITA		POM121C	CCL19	LPAR4		FLT1	POLR2J
CMKLR1		POT1	CCL2	LYN		FLT4	POLR2K
CNIH1		PPME1	CCL20	MAPT		PGF	POLR2L
CNR2		PPP1CB	CCL21	MMP2		VEGFB	POM121
COLEC12		PPP1CC	CCL22	MMP9		VEGFC	POM121C
CRHR1		PPP1R12A	CCL23	NFKB1		VEGFD	POT1
CRTAM		PPP1R12B	CCL24	PIK3CB		C1QC	PPME1
CTLA4		PPP2CB	CCL25	PIK3R1		C1R	PPP1CB
CTSC		PPP2R1A	CCL26	PLCB3		C1S	PPP1CC
CTSG		PPP2R1B	CCL27	PLCG1		C2	PPP1R12A
CTSW		PPP2R2A	CCL4	PRKCE		C3	PPP1R12B
CX3CL1		PPP2R2D	CCR2	PRKD1		C4A	PPP2CA
CXCL12		PPP2R3B	CCR4	PTK2		C4B	PPP2CB
CXCL13		PPP2R5A	CCR5	PTK2B		C4B_2	PPP2R1A
CXCR4		PPP2R5B	CCR6	PXN		C4BPA	PPP2R1B
DEFA1		PPP2R5C	CCR8	RAC1		C5	PPP2R2A
DEFB1		PPP2R5D	CCR9	RELA		C5AR1	PPP2R2D
DEFB103A		PPP2R5E	CD164	RHOA		C5AR2	PPP2R3B
DEFB118		PPP6C	CD1D	SLC9A3R2		C6	PPP2R5A
DEFB127		PPP6R3	CD22	SRC		C7	PPP2R5B
DEFB4A		PRDM9	CD274	TIAM1		C8A	PPP2R5C
DMBT1		PRIM1	CD28	TRIP6		C8B	PPP2R5D
DPP4		PRIM2	CD7	ACAA2		C8G	PPP2R5E
DPP8		PRKACA	CD79A	HTD2		C9	PPP6C
EBI3		PRKAR2B	CD79B	CPT1C		CD19	PPP6R3
ELP1		PSMC3IP	CD83	CPT1A		CD46	PRDM9
EREG		PSMD10	CD96	CPT1B		CD55	PRIM1
ETS1		PSMD5	CEBPB	CPT2		CD81	PRIM2
FCAR		PTK6	CEBPG	ECHS1		CFB	PRKACA
FCGR1A		RAB1A	CFHR1	EHHADH		CFD	PRKAR2B
FCGR2B		RAB1B	CHST4	ACSF3		CFH	PSMC3IP
FCGR3A		RAB2A	CHUK	HACD2		CFHR1	PSMD10
FCGR3B		RAB8A	CIITA	ACSL1		CFHR2	PSMD5
FCGRT		RAD1	CMKLR1	ACSL3		CFHR3	PTK6
FCN1		RAD17	CNIH1	ACSL4		CFHR4	RAB1A
FCN2		RAD21	CNR2	FASN		CFHR5	RAB1B
FOXP3		RAD50	COLEC12	ACSBG1		CFI	RAB2A
FTH1		RAD51C	CRHR1	ACSL6		CFP	RAB8A
FYB1		RAD9A	CRTAM	MCAT		CLU	RAD1
FYN		RAD9B	CTLA4	ACAA1		COLEC10	RAD17
GEM		RAE1	CTSC	HADHA		COLEC11	RAD21
GPI		RAN	CTSW	HADHB		CPN1	RAD50
GPR183		RANBP2	CXCL13	HADH		CPN2	RAD51C
GTPBP1		RANGAP1	DEFA1	ACACA		CR1	RAD9A
GZMA		RB1	DEFB1	HSD17B4		CR2	RAD9B
HAMP		RBBP4	DEFB103A	ACADL		CRP	RAE1
HLA-DRB3		RBBP7	DEFB118	ACADM		FCN1	RAN
HRH2		RBBP8	DEFB127	ACADS		FCN2	RANBP2
IFI6		RBL1	DEFB4A	ACADSB		FCN3	RANGAP1
IFITM2		RBL2	DMBT1	ACADVL		GZMM	RB1
IFITM3		RBX1	DPP4	ACAT1		IGHG1	RBBP4
IFNK		RCC2	DPP8	ACAT2		IGHG2	RBBP7
IFNL1		REC8	EBI3	FADS1		IGHG4	RBBP8
IFNLR1		RFC1	ELP1	HACD4		IGHV1-2	RBL1
IGSF6		RFC2	FCAR	MECR		IGHV1-46	RBL2
IK		RFC5	FCGR1A	HSD17B12		IGHV1-69	RBX1
IKBKG		RHNO1	FCGR3A	HACD3		IGHV2-5	RCC2
IL12A		RMI1	FCGR3B	ELOVL2		IGHV2-70	REC8
IL12B		RMI2	FCGRT	OXSM		IGHV3-11	RFC1
IL15		RNF168	FCN1	PPT1		IGHV3-13	RFC2
IL16		RNF8	FCN2	ELOVL5		IGHV3-23	RFC5
IL17A		RPA1	FOXP3	SCD		IGHV3-30	RHNO1
IL17B		RPA2	FTH1	SCP2		IGHV3-33	RMI1
IL18		RPA3	FYB1	ELOVL1		IGHV3-48	RMI2
IL18BP		RPA4	GEM	ELOVL4		IGHV3-53	RNF168
IL1R2		RPS27A	GPI	ELOVL6		IGHV3-7	RNF8
IL27		RSF1	GPR183	HSD17B8		IGHV4-34	RPA1
IL27RA		RTEL1	GTPBP1	SCD5		IGHV4-39	RPA2
IL4		SDCCAG8	GZMA	ELOVL7		IGHV4-59	RPA3
IL6R		SEC13	HAMP	ACSBG2		IGKV1-12	RPA4
IL6ST		SEH1L	HLA-DRB3	ACOX3		IGKV1-16	RPS27A
IL7		SET	HRH2	ELOVL3		IGKV1-17	RSF1
KIR2DL1		SFI1	IFI6	CBR4		IGKV1-33	RTEL1
KIR2DL3		SGO1	IFITM2	HACD1		IGKV1-39	SDCCAG8
KRT1		SGO2	IFITM3	PPT2		IGKV1-5	SEC13
LAT		SHQ1	IFNK	FADS2		IGKV1D-12	SEH1L
LAT2		SIRT2	IFNL1	TECR		IGKV1D-16	SET
LAX1		SKA1	IFNLR1	PTGES3		IGKV1D-33	SFI1
LTB4R		SKA2	IK	CYP4F8		IGKV1D-39	SGO1
LTF		SKP1	IKBKG	CYP2U1		IGKV2-28	SGO2
LY75		SKP2	IL12A	PRXL2B		IGKV2-30	SHQ1
LY86		SMARCA5	IL12B	CYP2B6		IGKV2D-28	SIRT2
MADCAM1		SMC1A	IL15	CYP2C19		IGKV2D-30	SKA1
MALT1		SMC1B	IL16	CYP2C8		IGKV2D-40	SKA2
MAP3K7		SMC2	IL17A	CYP2C9		IGKV3-11	SKP1
MAP4K2		SMC3	IL17B	CYP2E1		IGKV3-15	SKP2
MBL2		SMC4	IL18	CYP2J2		IGKV3-20	SMARCA5
MBP		SPAST	IL18BP	EPHX2		IGKV3D-20	SMC1A
MNX1		SPC24	IL1R2	ALOX12		IGKV4-1	SMC1B
MR1		SPC25	IL27	ALOX12B		IGKV5-2	SMC2
MS4A1		SPDL1	IL27RA	ALOX15		IGLC2	SMC3
MS4A2		SPO11	IL4	ALOX15B		IGLC3	SMC4
NCR1		SRC	IL6R	LTA4H		IGLV1-40	SPAST
NFAM1		SSNA1	IL6ST	CYP4F3		IGLV1-44	SPC24
NFIL3		STAG1	IL7	LTC4S		IGLV1-47	SPC25
OPRD1		STAG2	KIR2DL1	PTGDS		IGLV1-51	SPDL1
OPRK1		STAG3	KIR2DL3	PTGIS		IGLV2-11	SPO11
PAX5		STN1	LAT	PTGS1		IGLV2-14	SRC
PDCD1		SUMO1	LAT2	PTGS2		IGLV2-23	SSNA1
POU2AF1		SUN1	LAX1	TBXAS1		IGLV2-8	STAG1
POU2F2		SUN2	LTB4R	PTGES2		IGLV3-1	STAG2
PRELID1		SYCE1	LTF	CYP4F2		IGLV3-19	STAG3
PRKRA		SYCE2	LY75	AKR1C3		IGLV3-21	STN1
PTAFR		SYCE3	MALT1	CBR1		IGLV3-25	SUMO1
PTGDR2		SYCP1	MAP3K7	CBR3		IGLV3-27	SUN1
PYDC1		SYCP2	MAP4K2	PTGES		IGLV6-57	SUN2
RAG1		SYCP3	MBL2	CYP1A2		IGLV7-43	SYCE1
RFX1		SYNE1	MBP	CYP3A4		MASP1	SYCE2
RSAD2		SYNE2	MNX1			MASP2	SYCE3
S1PR4		TAOK1	MR1			MBL2	SYCP1
SECTM1		TEN1	MS4A1				SYCP2
SEMA3C		TERF1	MS4A2				SYCP3
SEMA4D		TERF2	NCR1				SYNE1
SEMA7A		TERF2IP	NFAM1				SYNE2
SFTPD		TEX12	NFIL3				TAOK1
SKAP1		TEX15	OPRD1				TEN1
SLA2		TFDP1	OPRK1				TERF1
SOCS5		TFDP2	PAX5				TERF2
SP2		TINF2	PDCD1				TERF2IP
SPINK5		TMPO	POU2AF1				TEX12
ST6GAL1		TNPO1	POU2F2				TEX15
TAPBP		TOP3A	PRELID1				TFDP1
TARBP2		TOPBP1	PRKRA				TFDP2
TCF12		TP53BP1	PSMB10				TINF2
TCF7		TPR	PTAFR				TMPO
TENM1		TUBA1A	PTGDR2				TNPO1
THY1		TUBA1B	PYDC1				TOP3A
TLR7		TUBA1C	RAG1				TOPBP1
TLR8		TUBA3C	RFX1				TP53BP1
TNFAIP1		TUBA3D	S1PR4				TPR
TNFRSF14		TUBA3E	SECTM1				TUBA1A
TNFRSF4		TUBA4A	SEMA3C				TUBA1B
TNFSF13		TUBA4B	SEMA4D				TUBA1C
TRAF2		TUBA8	SEMA7A				TUBA3C
TRAF6		TUBAL3	SFTPD				TUBA3D
TRAT1		TUBB	SKAP1				TUBA3E
TREM1		TUBB1	SLA2				TUBA4A
TREM2		TUBB2A	SOCS5				TUBA4B
TRIM22		TUBB2B	SP2				TUBA8
VIPR1		TUBB3	SPINK5				TUBAL3
VTN		TUBB4A	ST6GAL1				TUBB
WAS		TUBB4B	TAPBP				TUBB1
XBP1		TUBB6	TARBP2				TUBB2A
YTHDF2		TUBB8	TCF12				TUBB2B
ZEB1		TUBB8B	TCF7				TUBB3
CD3E		TUBG1	TENM1				TUBB4A
CD3G		TUBG2	THY1				TUBB4B
CD4		TUBGCP2	TLR8				TUBB6
CSK		TUBGCP3	TNFAIP1				TUBB8
HLA-DQA1		TUBGCP4	TNFRSF14				TUBB8B
HLA-DQA2		TUBGCP5	TNFRSF4				TUBG1
HLA-DQB1		TUBGCP6	TNFSF13				TUBG2
HLA-DQB2		UBB	TRAF2				TUBGCP2
HLA-DRB1		UBC	TRAF6				TUBGCP3
HLA-DRB4		UBE2D1	TREM1				TUBGCP4
HLA-DRB5		UBE2E1	TREM2				TUBGCP5
PDCD1LG2		UBE2I	TRIM22				TUBGCP6
PTPN11		UBE2N	UBE2N				UBB
PTPN6		UBE2S	VIPR1				UBC
TRAV19		UBE2V2	YTHDF2				UBE2D1
TRAV29DV5		UIMC1	CD3E				UBE2E1
TRAV8-4		USO1	CD3G				UBE2I
TRBV12-3		VPS4A	CD4				UBE2N
TRBV7-9		VRK1	CSK				UBE2S
PDCD1LG1		VRK2	HLA-DQA1				UBE2V2
IRF1		WAPL	HLA-DQA2				UIMC1
TBX21		WEE1	HLA-DQB1				USO1
ICOS		WRAP53	HLA-DQB2				VPS4A
TNFRSF6B		WRN	HLA-DRB1				VRK1
IL8		XPO1	HLA-DRB4				VRK2
IRTA2		YWHAB	HLA-DRB5				WAPL
INDO		YWHAE	PDCD1LG2				WEE1
IL18R1		YWHAG	TRAV19				WRAP53
MMP7		YWHAH	TRAV29DV5				WRN
LILRB3		YWHAQ	TRAV8-4				XPO1
PTGS2		YWHAZ	TRBV12-3				YWHAB
TNFRSF8		ZNF385A	TRBV7-9				YWHAE
CXCR3		ZW10	PDCD1LG1				YWHAG
GAPD		ZWILCH	IFNG				YWHAH
CD8A		AARS1	TBX21				YWHAQ
IRAK4		AARS2	ICOS				YWHAZ
CD3Z		AIMP1	TNFRSF6B				ZNF385A
EBAG9		AIMP2	IL8				ZW10
GATA3		APEH	IRTA2				ZWILCH
VEGF		AURKAIP1	INDO				AARS1
THSD1		CARS1	MMP7				AARS2
CXCR6		CARS2	LILRB3				AIMP1
JAG1		CHCHD1	PTGS2				AIMP2
TNFRSF10A		DAP3	TNFRSF8				APEH
ACE		DARS1	CXCR3				AURKAIP1
B7H3		DARS2	GAPD				CARS1
CD97		DDOST	CD8A				CARS2
CEACAM1		EARS2	IRAK4				CHCHD1
TNFSF4		EEF1A2	CD3Z				DAP3
ART1		EEF1B2	EBAG9				DARS1
DAP10		EEF1D	VEGF				DARS2
PLC?		EEF2	THSD1				DDOST
PKC		EIF1AX	CXCR6				EARS2
RAC		EIF2B1	JAG1				EEF1A2
PAK		EIF2B2	TNFRSF10A				EEF1B2
GLNY		EIF2B3	ACE				EEF1D
IL12RB2		EIF2B4	B7H3				EEF2
STAT4		EIF2B5	BIRC5				EIF1AX
A2M		EIF2S2	CD97				EIF2B1
AADACL1		EIF2S3	ART1				EIF2B2
AAK1		EIF3A	DAP10				EIF2B3
ABCA1		EIF3B	PLC?				EIF2B4
ABCF2		EIF3C	PKC				EIF2B5
ABCG1		EIF3D	RAC				EIF2S2
ABI3BP		EIF3E	PAK				EIF2S3
ABLIM1		EIF3F	GLNY				EIF3A
ACAA2		EIF3G	IL12RB2				EIF3B
ACAD8		EIF3H	STAT4				EIF3C
ACBD6		EIF3I	AADACL1				EIF3D
ACP5		EIF3J	AAK1				EIF3E
ACPL2		EIF3K	ABCA1				EIF3F
ACSL6		EIF3L	ABCF2				EIF3G
ACSM3		EIF3M	ABCG1				EIF3H
ACTA2		EIF4A2	ABI3BP				EIF3I
ACTG2		EIF4B	ABLIM1				EIF3J
ACTN4		EIF4EBP1	ACAA2				EIF3K
ACVR1C		EIF4H	ACAD8				EIF3L
ACVR2A		EIF5	ACBD6				EIF3M
ADAM12		EIF5B	ACP5				EIF4A2
ADAM28		EPRS1	ACPL2				EIF4B
ADAM9		ERAL1	ACSL6				EIF4EBP1
ADAMDEC1		ETF1	ACSM3				EIF4H
ADAMTS1		FARS2	ACTA2				EIF5
ADAMTS17		FARSA	ACTN4				EIF5B
ADAMTS9		FARSB	ACVR1C				EPRS1
ADD3		FAU	ACVR2A				ERAL1
ADFP		GADD45GIP1	ADAM28				ETF1
ADORA3		GARS1	ADAMDEC1				FARS2
AEBP1		GFM1	ADAMTS17				FARSA
AES		GFM2	ADD3				FARSB
AGR2		GSPT1	ADFP				FAU
AGR3		GSPT2	ADORA3				GADD45GIP1
AGTPBP1		HARS1	AEBP1				GARS1
AGTRL1		HARS2	AES				GFM1
AGXT2L2		IARS1	AGR2				GFM2
AHI1		IARS2	AGR3				GSPT1
AHR		KARS1	AGTPBP1				GSPT2
AK3L1		LARS1	AGTRL1				HARS1
AK5		LARS2	AGXT2L2				HARS2
AKAP10		MARS1	AHI1				IARS1
AKAP7		MARS2	AHR				IARS2
ALCAM		MRPL10	AK3L1				KARS1
ALDH2		MRPL11	AK5				LARS1
ALDH3B2		MRPL12	AKAP7				LARS2
ALDH7A1		MRPL13	AKT3				MARS1
ALKBH7		MRPL14	ALCAM				MARS2
ALS2CR13		MRPL15	ALDH2				MRPL10
ALS2CR16		MRPL16	ALDH3B2				MRPL11
AMICA1		MRPL17	ALDH7A1				MRPL12
AMIGO1		MRPL18	ALKBH7				MRPL13
AMMECR1		MRPL19	ALMS1				MRPL14
AMN1		MRPL2	ALS2CR13				MRPL15
AMOTL1		MRPL20	ALS2CR16				MRPL16
AMOTL2		MRPL21	AMICA1				MRPL17
ANG		MRPL22	AMIGO1				MRPL18
ANGPTL4		MRPL23	AMMECR1				MRPL19
ANK3		MRPL27	AMN1				MRPL2
ANKRD22		MRPL28	AMOTL1				MRPL20
ANKRD25		MRPL30	AMOTL2				MRPL21
ANKRD30A		MRPL32	ANAPC7				MRPL22
ANKRD37		MRPL33	ANG				MRPL23
ANKRD44		MRPL34	ANGPTL4				MRPL27
ANKRD49		MRPL35	ANK3				MRPL28
ANKRD50		MRPL36	ANKRD22				MRPL30
ANKRD55		MRPL37	ANKRD25				MRPL32
ANKRD57		MRPL38	ANKRD30A				MRPL33
ANKRD9		MRPL39	ANKRD37				MRPL34
ANLN		MRPL4	ANKRD44				MRPL35
ANTXR1		MRPL40	ANKRD49				MRPL36
ANUBL1		MRPL41	ANKRD50				MRPL37
ANXA2		MRPL42	ANKRD55				MRPL38
ANXA3		MRPL43	ANKRD57				MRPL39
ANXA4		MRPL44	ANKRD9				MRPL4
AP1M1		MRPL45	ANLN				MRPL40
AP1S2		MRPL46	ANTXR1				MRPL41
AP3M1		MRPL47	ANUBL1				MRPL42
AP4S1		MRPL48	ANXA3				MRPL43
APBA2		MRPL49	ANXA4				MRPL44
APBB2		MRPL50	AP1M1				MRPL45
APOBEC3B		MRPL51	AP1S2				MRPL46
APOC1		MRPL52	AP3M1				MRPL47
APOD		MRPL53	AP4S1				MRPL48
APOE		MRPL54	APBA2				MRPL49
APOLD1		MRPL55	APBB2				MRPL50
APP		MRPL57	APOBEC3B				MRPL51
APPBP2		MRPL58	APOC1				MRPL52
APRT		MRPL9	APOD				MRPL53
AQP1		MRPS10	APOLD1				MRPL54
AQR		MRPS11	APPBP2				MRPL55
AREG		MRPS14	APRT				MRPL57
ARF4		MRPS15	AQP1				MRPL58
ARHGAP18		MRPS16	AQR				MRPL9
ARHGAP26		MRPS17	AREG				MRPS10
ARHGAP29		MRPS18A	ARF4				MRPS11
ARHGAP30		MRPS18B	ARHGAP18				MRPS14
ARHGAP4		MRPS18C	ARHGAP26				MRPS15
ARHGAP5		MRPS21	ARHGAP29				MRPS16
ARHGAP8		MRPS22	ARHGAP30				MRPS17
ARHGEF12		MRPS23	ARHGAP4				MRPS18A
ARHGEF18		MRPS24	ARHGAP5				MRPS18B
ARHGEF3		MRPS25	ARHGAP8				MRPS18C
ARID1A		MRPS26	ARHGEF12				MRPS21
ARID4B		MRPS27	ARHGEF18				MRPS22
ARIH2		MRPS28	ARHGEF3				MRPS23
ARL17		MRPS30	ARID1A				MRPS24
ARL4A		MRPS31	ARID4B				MRPS25
ARMC8		MRPS33	ARIH2				MRPS26
ARMCX1		MRPS34	ARL17				MRPS27
ARPP-19		MRPS35	ARL4A				MRPS28
ARRB2		MRPS36	ARMC8				MRPS30
ARSD		MRPS5	ARMCX1				MRPS31
ASAHL		MRPS6	ARPP-19				MRPS33
ASCC2		MRPS7	ARSD				MRPS34
ASF1A		MRPS9	ASAHL				MRPS35
ASPH		MRRF	ASCC2				MRPS36
ASPM		MT-RNR1	ASF1A				MRPS5
ASPN		MT-RNR2	ASPH				MRPS6
ASS1		MTFMT	ASPM				MRPS7
ATAD2		MTIF2	ASS1				MRPS9
ATAD4		MTIF3	ATAD2				MRRF
ATF3		MTRF1L	ATAD4				MT-RNR1
ATF7IP2		N6AMT1	ATF3				MT-RNR2
ATG16L2		NARS1	ATF7IP2				MTFMT
ATOX1		NARS2	ATG16L2				MTIF2
ATP10A		OXA1L	ATM				MTIF3
ATP11A		PABPC1	ATOX1				MTRF1L
ATP1B1		PARS2	ATP10A				N6AMT1
ATP1B3		PPA1	ATP11A				NARS1
ATP2A2		PPA2	ATP1B1				NARS2
ATP2C1		PTCD3	ATP1B3				OXA1L
ATP6V1D		QARS1	ATP2A2				PABPC1
ATP6V1E2		RARS1	ATP2C1				PARS2
ATP8B1		RARS2	ATP6V1D				PPA1
ATP8B2		RPL10	ATP6V1E2				PPA2
ATP9A		RPL10L	ATP8B1				PTCD3
ATXN1		RPL13	ATP8B2				QARS1
ATXN3		RPL13A	ATP9A				RARS1
AUH		RPL14	ATXN1				RARS2
AUTS2		RPL15	ATXN3				RPL10
AXIN2		RPL17	AUH				RPL10L
AXL		RPL18	AURKA				RPL13
AXUD1		RPL18A	AUTS2				RPL13A
AZGP1		RPL19	AXIN2				RPL14
B3GNT2		RPL22	AXUD1				RPL15
B3GNT5		RPL22L1	AZGP1				RPL17
BACE2		RPL23A	B3GNT2				RPL18
BACH2		RPL24	B3GNT5				RPL18A
BAIAP2L1		RPL26	BACE2				RPL19
BAMBI		RPL26L1	BACH2				RPL22
BATF		RPL27	BAIAP2L1				RPL22L1
BBS2		RPL27A	BAMBI				RPL23A
BCAR3		RPL28	BATF				RPL24
BCL11B		RPL29	BBS2				RPL26
BCL6		RPL30	BCAR3				RPL26L1
BCLAF1		RPL32	BCAT1				RPL27
BCOR		RPL34	BCL11B				RPL27A
BCR		RPL35A	BCL6				RPL28
BET1		RPL36	BCLAF1				RPL29
BEX2		RPL36A	BCOR				RPL30
BGN		RPL36AL	BCR				RPL32
BHLHB2		RPL37	BET1				RPL34
BHLHB3		RPL37A	BEX2				RPL35A
BIC		RPL38	BHLHB2				RPL36
BIN1		RPL39	BHLHB3				RPL36A
BTBD3		RPL39L	BIC				RPL36AL
BTG3		RPL3L	BIN1				RPL37
BTLA		RPL4	BTBD3				RPL37A
BTNL9		RPL41	BTG3				RPL38
CA12		RPL7	BTLA				RPL39
CA2		RPL8	BTNL9				RPL39L
CACNA1I		RPL9	BUB1				RPL3L
CADPS2		RPLP0	BUB1B				RPL4
CALD1		RPLP1	CA12				RPL41
CALU		RPLP2	CA2				RPL7
CAMK2G		RPN1	CABLES1				RPL8
CAMK2N1		RPN2	CACNA1I				RPL9
CAMK4		RPS10	CADPS2				RPLP0
CAP2		RPS11	CALD1				RPLP1
CAPG		RPS12	CALU				RPLP2
CARD10		RPS13	CAMK2G				RPN1
CASC5		RPS15	CAMK2N1				RPN2
CASP8AP2		RPS16	CAMK4				RPS10
CAV1		RPS17	CAP2				RPS11
CAV2		RPS18	CAPG				RPS12
CBL		RPS2	CARD10				RPS13
CBX5		RPS20	CASC5				RPS15
CBX7		RPS21	CASP8				RPS16
CCDC101		RPS23	CASP8AP2				RPS17
CCDC109B		RPS24	CAV2				RPS18
CCDC22		RPS25	CBL				RPS2
CCDC39		RPS26	CBX7				RPS20
CCDC47		RPS27L	CC2D1B				RPS21
CCDC50		RPS28	CCDC101				RPS23
CCDC6		RPS29	CCDC109B				RPS24
CCDC64		RPS3A	CCDC22				RPS25
CCDC65		RPS4X	CCDC39				RPS26
CCDC73		RPS4Y1	CCDC47				RPS27L
CCDC76		RPS4Y2	CCDC50				RPS28
CCDC80		RPS7	CCDC6				RPS29
CCDC93		RPSA	CCDC64				RPS3A
CCDC98		SARS1	CCDC65				RPS4X
CCL8		SARS2	CCDC73				RPS4Y1
CCM2		SEC11A	CCDC76				RPS4Y2
CCNG2		SEC11C	CCDC80				RPS7
CCNY		SEC61A1	CCDC93				RPSA
CCT8		SEC61A2	CCDC98				SARS1
CD109		SEC61B	CCL8				SARS2
CD163		SEC61G	CCM2				SEC11A
CD1A		SPCS1	CCNB1				SEC11C
CD200		SPCS2	CCNB2				SEC61A1
CD24		SPCS3	CCND1				SEC61A2
CD244		SRP14	CCND3				SEC61B
CD47		SRP19	CCNG2				SEC61G
CD55		SRP54	CCNH				SPCS1
CD58		SRP68	CCNY				SPCS2
CD59		SRP72	CCT8				SPCS3
CD6		SRP9	CD1A				SRP14
CD63		SRPRA	CD24				SRP19
CD80		SSR1	CD244				SRP54
CD81		SSR2	CD55				SRP68
CD9		SSR3	CD58				SRP72
CDC14B		SSR4	CD6				SRP9
CDC2		TARS1	CD63				SRPRA
CDC2L5		TARS2	CD80				SSR1
CDC40		TRAM1	CD81				SSR2
CDC42BPA		TRMT112	CDC14B				SSR3
CDC42EP4		TSFM	CDC2				SSR4
CDC42SE1		TUFM	CDC20				TARS1
CDCA3		VARS1	CDC25B				TARS2
CDCP1		VARS2	CDC26				TRAM1
CDH1		WARS1	CDC2L5				TRMT112
CDH11		WARS2	CDC40				TSFM
CDH3		YARS1	CDC42BPA				TUFM
CDK2AP1		YARS2	CDC42EP4				VARS1
CDKN3		ADAM10	CDC42SE1				VARS2
CDS1		ADAM17	CDCA3				WARS1
CEACAM6		APH1A	CDCP1				WARS2
CENTA2		APH1B	CDK2AP1				YARS1
CENTB1		ARRB1	CDKN1A				YARS2
CENTB2		ARRB2	CDKN3				CHIA
CENTD1		CNTN1	CDS1				CHIT1
CENTG2		DLK1	CENPA				HEXA
CEP110		DLL1	CENPF				HEXB
CEP55		DLL4	CENPK				NAGK
CEP68		DNER	CENPL				PGM3
CERKL		DTX1	CENTA2				UAP1
CFB		DTX2	CENTB1				UAP1L1
CFI		DTX4	CENTB2				GNE
CFP		ITCH	CENTD1				RENBP
CGA		JAG1	CENTG2				NANS
CGN		JAG2	CEP110				NANP
CGNL1		MIB1	CEP55				NPL
CH25H		MIB2	CEP68				CMAS
CHD3		NCSTN	CERKL				CYB5R1
ChGn		NEURL1	CFB				CYB5R3
CHI3L1		NEURL1B	CFI				CYB5R2
CHMP5		NOTCH1	CFP				CYB5RL
CHN1		NUMB	CGA				CYB5R4
CHRM3		PSEN1	CGN				HK3
CIRBP		PSEN2	CGNL1				HK1
CISD3		PSENEN	CHD3				HK2
CISH		PLA2G4B	ChGn				HKDC1
CKS2		LPCAT3	CHI3L1				AMDHD2
CLC		CEPT1	CHMP4C				GNPNAT1
CLDN1		CDS1	CHMP5				GNPDA1
CLDN11		CDIPT	CHMP7				GNPDA2
CLDN12		LYPLA1	CHN1				GFPT2
CLDN4		AGPAT1	CHRM3				GFPT1
CLDN8		AGPAT2	CIRBP				UXS1
CLDND1		PNPLA6	CISD3				GCK
CLEC12A		CHAT	CISH				GPI
CLEC2D		PLAAT3	CKS1B				PGM1
CLIC2		CHKA	CKS2				PGM2
CLIC4		CHKB	CLC				UGP2
CLU		LYPLA2	CLDN11				UGDH
CMBL		PLD4	CLDN12				GALK1
CMTM4		PLA2G4E	CLDN8				GALT
CNKSR3		MBOAT2	CLDND1				GALE
CNN3		GPAT4	CLEC12A				PMM2
CNO		DGKK	CLEC2D				PMM1
CNOT7		GPAT2	CLIC2				GMPPB
CNOT8		PLB1	CLIC4				GMPPA
COBLL1		MBOAT1	CLU				GMDS
COL11A1		DGKA	CMBL				MPI
COL12A1		DGKB	CMTM4				FCSK
COL15A1		DGKG	CNKSR3				FPGT
COL16A1		DGKH	CNN3				GFUS
COL1A1		DGKQ	CNO				FBP1
COL1A2		PHOSPHO1	CNOT7				ALDOA
COL27A1		PLPP4	CNOT8				ALDOB
COL3A1		GPD1L	COBLL1				ALDOC
COL4A1		PLD3	CORO1C				AKR1B1
COL4A2		PLA2G15	COX19				TKFC
COL4A5		PISD	CPA3				KHK
COL5A1		LCLAT1	CPB1				PFKFB1
COL5A2		LPCAT4	CPE				PFKFB2
COL6A1		PLA2G4F	CPEB2				PFKFB3
COL6A2		PLA2G2D	CPM				PFKFB4
COL6A3		GPD1	CR1				PFKL
COL8A1		GPD2	CRABP2				PFKP
CORO1C		PLA2G4D	CRBN				ENOSF1
COX19		PLA2G2E	CREB3L4				AKR1B10
CPA3		PNPLA7	CREBZF				TIGAR
CPB1		PLA2G2C	CREG1				SORD
CPE		LCAT	CREM				TPI1
CPEB2		ACHE	CRIM1				FBP2
CPM		PLA2G3	CRISPLD1				GALM
CR1		PCYT1A	CRLF3				G6PC1
CRABP2		PLA1A	CROCCL1				GAA
CRBN		PLA2G1B	CRTC3				GANC
CREB3L4		PLA2G2A	CSDA				B4GALT1
CREBZF		PLA2G4A	CSRP2				GLA
CREG1		PLA2G5	CSRP2BP				GLB1
CREM		PLD1	CTA-221G9.4				LALBA
CRIM1		PLD2	CTA-246H3.1				LCT
CRISPLD1		CRLS1	CTBP2				G6PC2
CRLF3		LPCAT2	CTDSP2				SI
CROCCL1		ETNK2	CTDSPL				MGAM
CRTC3		AGPAT5	CTDSPL2				G6PC3
CSDA		ETNK1	CTGF				MGAM2
CSRP2		GPCPD1	CTHRC1				GSTO2
CSRP2BP		AGPAT3	CTNNA1				GGT6
CTA-221G9.4		AGPAT4	CTNNAL1				GSTA5
CTA-246H3.1		ADPRM	CTNND1				G6PD
CTBP2		CHPT1	CTSH				GPX6
CTDSP2		PCYT2	CTSL1				GGT1
CTDSPL		PLA2G2F	CTSL2				GGT7
CTDSPL2		ETNPPL	CTSZ				GGT5
CTGF		TAZ	CTTN				OPLAH
CTHRC1		MBOAT7	CTTNBP2NL				GCLC
CTNNA1		LPCAT1	CUGBP2				GCLM
CTNNAL1		PTDSS2	CUTC				HPGDS
CTNND1		PLA2G12A	CX3CR1				GPX1
CTSB		PLA2G6	CXADR				GPX3
CTSD		PLA2G10	CXCL10				GPX4
CTSH		GNPAT	CXCL11				GPX5
CTSK		PLPP5	CXCL16				GPX7
CTSL1		PLA2G12B	CXorf50B				ANPEP
CTSL2		GPAT3	CXorf52				GSR
CTSZ		DGKZ	CXXC5				GSS
CTTN		DGKE	CYB561D1				GSTA1
CTTNBP2NL		DGKD	CYB561D2				GSTA2
CUGBP2		SELENOI	CYBRD1				GSTA3
CUTC		PLA2G4C	CYFIP1				GSTA4
CX3CR1		PLPP1	CYFIP2				GSTM1
CXADR		PLPP2	CYLD				GSTM2
CXCL10		PLPP3	CYP51A1				GSTM3
CXCL11		JMJD7-PLA2G4B	CYR61				GSTM4
CXCL14		CDS2	CYYR1				GSTM5
CXCL16		DGKI	D4S234E				GSTP1
CXCL9		PCYT1B	DAB2				GSTT1
CXorf50B		PGS1	DACT1				GSTT2
CXorf52		PTDSS1	DARC				IDH1
CXXC5		LPGAT1	DCLK1				IDH2
CYB561D1			DDAH1				GSTK1
CYB561D2			DDEF2				MGST2
CYBRD1			DDHD2				MGST3
CYFIP1			DDX19A				GPX8
CYFIP2			DDX28				CHAC2
CYLD			DDX3X				RRM2B
CYP51A1			DDX46				LAP3
CYR61			DENND4B				TXNDC12
CYYR1			DEPDC6				NAT8B
D4S234E			DFFB				PGD
DAB2			DFNA5				RRM1
DACT1			DHCR24				GSTT2B
DARC			DHPS				SMS
DCLK1			DIP				GGCT
DCN			DIP2A				CHAC1
DDAH1			DIS3				NAT8
DDEF2			DIS3L				GSTO1
DDHD2			DKFZP434B0335				PRDX6
DDR1			DKFZp434H1419				ADH1A
DDR2			DKFZP564O0823				ADH1C
DDX19A			DKFZp667E0512				ADH4
DDX28			DKFZP761M1511				ADH5
DDX3X			DKK3				ADH6
DDX46			DLC1				ADH7
DENND4B			DLG5				COMT
DEPDC6			DLG7				GOT1L1
DFNA5			DMN				DBH
DGKA			DNAH1				DCT
DGKD			DNAJA1				DDC
DHCR24			DNAJA4				ALDH3A1
DHPS			DNAJB1				FAH
DIO2			DNAJB4				LRTOMT
DIP			DNAJC1				ALDH3B1
DIP2A			DNAJC12				ALDH3B2
DIS3			DNAJC19				IL4I1
DIS3L			DOCK10				GOT1
DKFZP434B0335			DOCK4				GOT2
DKFZp434H1419			DOPEY1				GSTZ1
DKFZP564O0823			DPEP2				HGD
DKFZp667E0512			DPH1				AOC2
DKFZP761M1511			DPH5				AOX1
DKK3			DPYD				HPD
DLC1			DPYSL3				MAOA
DLG5			DSC1				MAOB
DLG7			DSC2				MIF
DMD			DSC3				PNMT
DMN			DSE				TAT
DNAH1			DSG2				TH
DNAJA1			DTL				TPO
DNAJA4			DTNA				TYR
DNAJB1			DUSP16				TYRP1
DNAJB4			DUSP4				FAHD1
DNAJC1			DUSP5				AOC3
DNAJC12			DYRK2				ACAA2
DNAJC19			EAPP				HTD2
DOCK10			ECHDC1				CPT1C
DOCK4			ECSM2				CPT1A
DOCK8			ECT2				CPT1B
DOCK9			EDAR				CPT2
DOPEY1			EDG1				ECHS1
DPEP2			EEF1A1				EHHADH
DPH1			EEF1B2				ACSF3
DPH5			EEF1D				HACD2
DPYD			EEF2K				ACSL1
DPYSL3			EFCAB4A				ACSL3
DSC1			EFCAB4B				ACSL4
DSC2			EFHD1				ACSBG1
DSC3			EFNA1				ACSL6
DSE			EFNA5				MCAT
DSG2			EFNB2				ACAA1
DSP			EFS				HADHA
DST			EGR1				HADHB
DTL			EGR3				HADH
DTNA			EHF				ACACA
DUSP10			EIF2C4				HSD17B4
DUSP16			EIF2S3				ACADL
DUSP4			EIF3F				ACADM
DUSP5			EIF3G				ACADS
DYRK2			EIF3K				ACADSB
EAPP			EIF4B				ACADVL
ECHDC1			EIF4E3				ACAT1
ECM2			EIF4EBP2				ACAT2
ECSM2			ELF3				FADS1
ECT2			ELF5				HACD4
EDAR			ELL2				ACOX1
EDG1			ELTD1				MECR
EDIL3			EMP1				HSD17B12
EDNRA			EMP2				HACD3
EEF1A1			ENAH				ELOVL2
EEF1B2			ENC1				OXSM
EEF1D			ENPP1				PPT1
EEF2K			ENTPD4				ELOVL5
EFCAB4A			EPAS1				SCP2
EFCAB4B			EPB41				ELOVL1
EFEMP1			EPB41L2				ELOVL4
EFHD1			EPB41L4A				ELOVL6
EFNA1			EPC2				HSD17B8
EFNA5			EPHX2				SCD5
EFNB2			EPS8				ELOVL7
EFS			EPSTI1				ACSBG2
EGR1			ERBB4				ACOX3
EGR3			ERC1				ELOVL3
EHF			ERCC5				CBR4
EIF2C4			ERICH1				HACD1
EIF2S3			ERRFI1				PPT2
EIF3F			ESD				FADS2
EIF3G			ESR1				TECR
EIF3K			ETNK1
EIF4B			ETV1
EIF4E3			ETV5
EIF4EBP2			ETV6
ELF3			EVI1
ELF5			EVL
ELL2			EXT1
ELTD1			EZH1
EMCN			EZH2
EMP1			FABP4
EMP2			FABP5
ENAH			FABP7
ENC1			FAIM3
ENPP1			FAM100B
ENPP2			FAM101B
ENTPD1			FAM102B
ENTPD4			FAM110B
EPAS1			FAM110C
EPB41			FAM113B
EPB41L2			FAM114A1
EPB41L4A			FAM116A
EPB41L4B			FAM119A
EPC2			FAM120B
EPHX2			FAM122B
EPS8			FAM129A
EPSTI1			FAM133B
ERBB3			FAM13A1
ERBB4			FAM13A1OS
ERC1			FAM19A1
ERCC5			FAM20C
ERICH1			FAM43A
ERRFI1			FAM46C
ESD			FAM55C
ESR1			FAM62B
ETNK1			FAM76B
ETV1			FAM78A
ETV5			FAM79A
ETV6			FAM83D
EVI1			FAM8A1
EVL			FANCI
EXT1			FANCL
EZH1			FARP1
EZH2			FARSB
F11R			FAS
FABP4			FAT
FABP5			FBL
FABP7			FBLIM1
FAIM3			FBXL5
FAM100B			FBXL7
FAM101B			FBXO38
FAM102B			FBXO42
FAM110B			FBXO45
FAM110C			FBXO9
FAM113B			FBXW2
FAM114A1			FCHO2
FAM116A			FER1L3
FAM119A			FEZ2
FAM120B			FGD3
FAM122B			FGD5
FAM129A			FGF13
FAM133B			FGFBP2
FAM13A1			FHIT
FAM13A1OS			FHL1
FAM19A1			FHL2
FAM20C			FILIP1L
FAM43A			FJX1
FAM46C			FKBP9
FAM55C			FLJ10038
FAM62B			FLJ10154
FAM76B			FLJ11850
FAM78A			FLJ12334
FAM79A			FLJ12993
FAM83D			FLJ13197
FAM8A1			FLJ20273
FANCI			FLJ32255
FANCL			FLJ35348
FARP1			FLJ36840
FARSB			FLJ37453
FAS			FLJ39639
FAT			FLJ40330
FBL			FLJ41603
FBLIM1			FLJ46446
FBN1			FLOT2
FBXL5			FLT3LG
FBXO38			FMNL2
FBXO42			FMNL3
FBXO45			FNBP1L
FBXO9			FNBP4
FBXW2			FNDC3B
FCHO2			FNTA
FER1L3			FOSB
FEZ2			FOSL2
FGD3			FOXA1
FGD5			FOXK1
FGF13			FOXP1
FGFBP2			FPRL2
FGFR2			FRAT1
FGG			FRMD4A
FHIT			FRMD4B
FHL1			FRMD6
FHL2			FRY
FILIP1L			FSTL1
FJX1			FUBP1
FKBP9			FUCA1
FLJ10038			FXN
FLJ10154			FXYD3
FLJ11850			FXYD5
FLJ12334			FZD1
FLJ12993			FZD4
FLJ13197			FZD5
FLJ20273			GABARAPL3
FLJ32255			GABPB2
FLJ35348			GABRP
FLJ36840			GADD45G
FLJ37453			GALK2
FLJ39639			GALNT1
FLJ40330			GALNT12
FLJ41603			GALNT3
FLJ46446			GALT
FLOT2			GARNL4
FLT1			GAS1
FLT3LG			GAS2L1
FMNL2			GATAD2A
FMNL3			GATM
FN1			GCA
FNBP1L			GCNT1
FNBP4			GCUD2
FNDC3B			GFPT1
FNTA			GGH
FOSB			GGTA1
FOSL2			GIMAP1
FOXA1			GIMAP2
FOXC1			GIMAP7
FOXK1			GIMAP8
FOXP1			GINS1
FPR1			GINS2
FPRL2			GJA7
FRAT1			GK
FRMD4A			GLA
FRMD4B			GLIPR1
FRMD6			GLIS2
FRY			GLT8D2
FSTL1			GLTSCR2
FUBP1			GLUL
FUCA1			GM2A
FXN			GMFB
FXYD3			GMNN
FXYD5			GNB2L1
FZD1			GNB4
FZD4			GNG12
FZD5			GNL3
FZD7			GOLGA1
GABARAPL3			GOLIM4
GABPB2			GOLM1
GABRP			GOPC
GADD45G			GPA33
GALK2			GPATCH8
GALNT1			GPC1
GALNT12			GPM6B
GALNT3			GPNMB
GALT			GPR107
GARNL4			GPR116
GAS1			GPR126
GAS2L1			GPR137B
GAS6			GPR155
GATA6			GPR177
GATAD2A			GPR34
GATM			GPRASP1
GCA			GPRC5A
GCNT1			GPRIN3
GCUD2			GPSM2
GFPT1			GPSN2
GGH			GRAMD3
GGTA1			GRAP
GIMAP1			GRB14
GIMAP2			GRHL1
GIMAP5			GRK6
GIMAP7			GSPT2
GIMAP8			GSTA4
GJA1			GSTK1
GJA7			GSTO2
GK			GTDC1
GLA			GTF2A2
GLI3			GTF3A
GLIPR1			GUCY1A3
GLIS2			GUCY1B3
GLT8D2			GULP1
GLTSCR2			GUSBL2
GLUL			H19
GM2A			H2BFS
GMFB			H3F3B
GNA11			HAVCR2
GNAS			HBA1
GNB2L1			HBA2
GNB4			hCG_1815491
GNG12			hCG_2045751
GNL3			hCG_25653
GOLGA1			HDAC4
GOLIM4			HDGFRP3
GOLM1			HDHD1A
GOPC			HEATR2
GP5			HEATR5B
GPA33			HECTD2
GPATCH8			HEL308
GPC1			HELZ
GPM6B			HEMGN
GPNMB			HERPUD1
GPR107			HES1
GPR116			HEXA
GPR126			HEXIM1
GPR137B			HEY1
GPR155			HIF1AN
GPR177			HIG2
GPR34			HIP1
GPRASP1			HIPK2
GPRC5A			HIST1H1C
GPRIN3			HIST1H2AC
GPSM2			HIST1H2BC
GPSN2			HIST1H2BD
GRAMD3			HIST1H2BG
GRAP			HIST1H2BK
GRB14			HIST1H3D
GRHL1			HIST1H4H
GRK6			HIST2H2AA3
GSN			HIST2H2AA4
GSPT2			HIST2H2BE
GSTA4			HIVEP2
GSTK1			HK3
GSTO2			HKDC1
GTDC1			HLA-DOA
GTF2A2			HLF
GTF3A			HMG20A
GUCY1A3			HMGB3
GUCY1B3			HMGCS1
GULP1			HMHA1
GUSBL2			HMMR
H19			HN1L
H2BFS			HNMT
H3F3B			HNRPDL
HAVCR2			HNRPLL
HBA1			HOXC6
HBA2			HPCAL1
HBB			HRASLS3
hCG_1815491			HS3ST1
hCG_2045751			HSD17B11
hCG_25653			HSMPP8
HDAC4			HSP90AA1
HDGFRP3			HSP90B1
HDHD1A			HSPA1A
HEATR2			HSPA1B
HEATR5B			HSPA1L
HECTD2			HSPA2
HEL308			HSPB8
HELZ			HSPD1
HEMGN			HSPH1
HERPUD1			HTRA1
HES1			HTRA4
HEXA			ICA1
HEXIM1			ID1
HEY1			ID3
HIF1AN			ID4
HIG2			IDH1
HIP1			IDS
HIPK2			IER5
HIST1H1C			IER5L
HIST1H2AC			IFI27
HIST1H2BC			IFI44
HIST1H2BD			IFI44L
HIST1H2BG			IFIT1
HIST1H2BK			IFIT2
HIST1H3D			IFIT3
HIST1H4H			IFRD1
HIST2H2AA3			IFT80
HIST2H2AA4			IGF1R
HIST2H2BE			IGFBP3
HIVEP2			IGFBP4
HK3			IGFBP5
HKDC1			IGFBP7
HLA-DOA			IGFL2
HLF			IGHA1
HMG20A			IGHG3
HMGB3			IGHM
HMGCS1			IGJ
HMHA1			IGKC
HN1L			IGL@
HNMT			IGLJ3
HNRPDL			IGSF3
HNRPLL			IKZF2
HOXC6			IKZF4
HPCAL1			IKZF5
HRASLS3			IL11RA
HS3ST1			IL13RA1
HSD17B11			IL17RA
HSMPP8			IL17RB
HSP90B1			IL17RD
HSPA1A			IL1R1
HSPA1B			IL28RA
HSPA1L			IMPAD1
HSPB1			INHBA
HSPB8			INPP4B
HSPH1			INPP5F
HTRA1			INSR
HTRA4			INVS
ICA1			IPO9
ICAM1			IQGAP3
ICAM2			IQSEC1
ICAM3			IRAK2
ID1			IREB2
ID3			IRF6
ID4			IRX2
IDH1			IRX3
IDS			IRX5
IER5			ISG15
IER5L			ITSN1
IFI27			ITSN2
IFI44			JAG2
IFI44L			JARID1B
IFIT1			JMJD2C
IFIT2			JMJD5
IFIT3			JMY
IFRD1			JUND
IFT80			KAL1
IGF1			KBTBD11
IGF1R			KCNK1
IGFBP3			KCNK5
[truncated: 1,345 more rows]
