# Supplementary material for: Canonical WNT signaling-driven DKC1 dysregulates sphingolipid biosynthesis and drives colorectal cancer.
Source: Research Square preprint supplement (doi:10.21203/rs.3.rs-3180701/v1), 2023-12-04
Supplement: Supplementary file 7 [file c662a1c2800d6653be180ada.xlsx]

## Sheet: Sheet1
Supplementary table 7: Primers used in this study for qPCR and ChIP-PCR experiments.
Gene	Primer name	Sequence (5'-3')
CCNB1	qCCNB1_F	CAGCACCTGGCTAAGAATGTAG
	qCCNB1_R	GCAGAATTCAGCTGTGGTAGAG
CDK1	qCDK1_F	CAGGATGTGCTTATGCAGGA
	qCDK1_R	TGTACTGACCAGGAGGGATAG
MCM10	qMCM10_F	CAGTAACTGTGGCCTCTACAA
	qMCM10_R	GGTAACAGAGTTTCTCCTCCTATC
DKC1	qDKC1_F	GTAAATGCCATCTGCTATGGG
	qDKC1_R	GCTTCTCCTTTGGTGGTGATA
SGPP2	qSGPP2_F	TTTCCACCTTGGTGTGTCTC
	qSGPP2_R	GTAGGTGAGGACGATGAGGA
GAPDH	qGAPDH_F	TGCACCACCAACTGCTTAGC
	qGAPDH_R	GGCATGGACTGTGGTCATGAG
SOX2	qSOX2_F	CATGGGTTCGGTGGTCAAG
	qSOX2_R	TGATCATGTCCCGGAGGT
KIT	qKIT_F	CAAGGCTTCTCCAATTCTGC
	qKIT_R	TGCAGTGGTCCACAGAAGAG
NANOG	qNANOG_F	TTCACTGTGTTAGCCAGGATG
	qNANOG_R	TGGCTCACGCCTGTAAATC
BRCA1	qBRCA1_F	GCTGCTGCTCATACTACTGATAC
	qBRCA1_R	GACACCACCATGGACATTCTT
BRCA2	qBRCA2_F	CTCAGCCCAGATGACTTCAAA
	qBRCA2_R	GGACTAACAGGTGGAGGTAAAG
ATM	qATM_F	GGACCACACAGGAGAATATGG
	qATM_R	TTGCCATCGGAACCTACAC
RAD51C	qRAD51C_F	CCTCAGGGATTTAGAGATACTGTTG
	qRAD51C_R	ATTCTTCCTCTGGGTCTCGT
RAD51D	qRAD51D_F	GGATTCTCCTGGACACCATC
	qRAD51D_R	GGTCCCAATGTCTACCATCTC
PRKDC	qPRKDC_F	GTGGCCTTACTGGACAAAGA
	qPRKDC_R	CAATAGCCTGCGGGTAGTTAT
CTNNB1	qCTNNB1_F	CAAGAAACGGCTTTCAGTTGAG
	qCTNNB1_R	TGGGCACCAATATCAAGTCC
DKC1_CBM4	F_CBM4_ChIP	GTGGCTGCTTCAACCATAGA
	R_CBM4_ChIP	ACCTCCAAAGCAAGGGTTAG
DKC1_CBM3	F_CBM3_ChIP	GATTATAGCCTCCAGCCATCC
	R_CBM3_ChIP	CAAGACAGGACACAGTGAGAA
DKC1_CBM2	F_CBM2_ChIP	TTTCGGATACGCTGGGTTAAA
	R_CBM2_ChIP	CAGCAGCAACATGAAAGAAGAG
DKC1_CBM1	F_CBM1_ChIP	GCACGCACACTACTCCTATT
	R_CBM1_ChIP	TTTCTCACACCGACCCTTTC
LGR5	F_LGR5_ChIP	TTTTCCTCCCTTCCTTCCTC
	R_LGR5_ChIP	CTAATCGGGGTTTGTGGTTG
ANKARD5	F_ANKARD5_ChIP	TCCTAGGCTCTGCTTTGAGC
	R_ANKARD5_ChIP	ATGTTGGGCCACATAAAAGC
CD70	F_CD70_ChIP	TCTGCCAGTGGAAGTGTTTG
	R_CD70_ChIP	GCTGGGGTCTTCTGGTCTTA
SGPP2_SBM1	F_SBM1_ChIP	GTACAAAGTAGCCTCTAAGGC
	R_SBM1_ChIP	GCCAAAATTATGGACCTCTTC
SGPP2_SBM2	F_SBM2_ChIP	CGCGTTTTTCTCTGTGTATGC
	R_SBM2_ChIP	CAATGCATAGTCTTGGCCTC
NANOG	F_NANOG_ChIP	GCTGGGTTTGTCTTCAGGTTC
	R_NANOG_ChIP	CACACCCCCTACTGACCCAC
